# Supplementary material for: Effect of routinely assessing and addressing depression and diabetes distress on clinical outcomes among adults with type 2 diabetes: a systematic review
Source: PubMed Central journal article supplement — BMJ Open. 2022 May 24;12(5):e054650. doi: 10.1136/bmjopen-2021-054650 (PMC9134162; doi:10.1136/bmjopen-2021-054650), 2022-05-24
Supplement: bmjopen-2021-054650.draft_revisions.pdf [file bmjopen-2021-054650.draft_revisions.pdf]

# BMJ Open

BMJ Open is committed to open peer review. As part of this commitment we make the peer review history of every article we publish publicly available.

When an article is published we post the peer reviewers' comments and the authors' responses online. We also post the versions of the paper that were used during peer review. These are the versions that the peer review comments apply to.

The versions of the paper that follow are the versions that were submitted during the peer review process. They are not the versions of record or the final published versions. They should not be cited or distributed as the published version of this manuscript.

BMJ Open is an open access journal and the full, final, typeset and author-corrected version of record of the manuscript is available on our site with no access controls, subscription charges or pay-per-view fees (<http://bmjopen.bmj.com>).

If you have any questions on BMJ Open's open peer review process please email [info.bmjopen@bmj.com](mailto:info.bmjopen@bmj.com)

# BMJ Open

## Effect of routinely assessing and addressing depression and diabetes distress on clinical outcomes among adults with type 2 diabetes: A systematic review

|                               |                                                                                                                                                                                                                                                                                                                                                                                                                                                                                                                                                                                                                                                                                                                                                                                                                                                                                              |
|-------------------------------|----------------------------------------------------------------------------------------------------------------------------------------------------------------------------------------------------------------------------------------------------------------------------------------------------------------------------------------------------------------------------------------------------------------------------------------------------------------------------------------------------------------------------------------------------------------------------------------------------------------------------------------------------------------------------------------------------------------------------------------------------------------------------------------------------------------------------------------------------------------------------------------------|
| Journal:                      | <i>BMJ Open</i>                                                                                                                                                                                                                                                                                                                                                                                                                                                                                                                                                                                                                                                                                                                                                                                                                                                                              |
| Manuscript ID                 | bmjopen-2021-054650                                                                                                                                                                                                                                                                                                                                                                                                                                                                                                                                                                                                                                                                                                                                                                                                                                                                          |
| Article Type:                 | Original research                                                                                                                                                                                                                                                                                                                                                                                                                                                                                                                                                                                                                                                                                                                                                                                                                                                                            |
| Date Submitted by the Author: | 22-Jun-2021                                                                                                                                                                                                                                                                                                                                                                                                                                                                                                                                                                                                                                                                                                                                                                                                                                                                                  |
| Complete List of Authors:     | McMorrow, Rita; The University of Melbourne, Department of General Practice<br>Hunter, Barbara; The University of Melbourne, Department of General Practice<br>Hendrieckx, Christel; The Australian Centre for Behavioural Research in Diabetes<br>Kwaśnicka, Dominika ; The University of Melbourne, NHMRC CRE in Digital Technology to Transform Chronic Disease Outcomes, Melbourne School of Population and Global Health; SWPS University of Social Sciences and Humanities, Faculty of Psychology<br>Speight, Jane; The Australian Centre for Behavioural Research in Diabetes,<br>Cussen, Leanne; Beaumont Hospital<br>Ho, Felicia Ching Siew ; The University of Melbourne, Melbourne Medical School<br>Emery, Jon; University of Melbourne, General Practice and Primary Care Academic Centre<br>Manski-Nankervis, Jo-Anne; University of Melbourne, Department of General Practice |
| Keywords:                     | General diabetes < DIABETES & ENDOCRINOLOGY, Depression & mood disorders < PSYCHIATRY, Diabetes & endocrinology < INTERNAL MEDICINE                                                                                                                                                                                                                                                                                                                                                                                                                                                                                                                                                                                                                                                                                                                                                          |
|                               |                                                                                                                                                                                                                                                                                                                                                                                                                                                                                                                                                                                                                                                                                                                                                                                                                                                                                              |

SCHOLARONE™  
Manuscripts

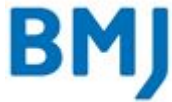

I, the Submitting Author has the right to grant and does grant on behalf of all authors of the Work (as defined in the below author licence), an exclusive licence and/or a non-exclusive licence for contributions from authors who are: i) UK Crown employees; ii) where BMJ has agreed a CC-BY licence shall apply, and/or iii) in accordance with the terms applicable for US Federal Government officers or employees acting as part of their official duties; on a worldwide, perpetual, irrevocable, royalty-free basis to BMJ Publishing Group Ltd ("BMJ") its licensees and where the relevant Journal is co-owned by BMJ to the co-owners of the Journal, to publish the Work in this journal and any other BMJ products and to exploit all rights, as set out in our [licence](#).

The Submitting Author accepts and understands that any supply made under these terms is made by BMJ to the Submitting Author unless you are acting as an employee on behalf of your employer or a postgraduate student of an affiliated institution which is paying any applicable article publishing charge ("APC") for Open Access articles. Where the Submitting Author wishes to make the Work available on an Open Access basis (and intends to pay the relevant APC), the terms of reuse of such Open Access shall be governed by a Creative Commons licence – details of these licences and which [Creative Commons](#) licence will apply to this Work are set out in our licence referred to above.

Other than as permitted in any relevant BMJ Author's Self Archiving Policies, I confirm this Work has not been accepted for publication elsewhere, is not being considered for publication elsewhere and does not duplicate material already published. I confirm all authors consent to publication of this Work and authorise the granting of this licence.

**Title:** Effect of routinely assessing and addressing depression and diabetes distress on clinical outcomes among adults with type 2 diabetes: A systematic review

## Authors

Rita McMorrow<sup>1</sup> Barbara Hunter<sup>1</sup> Christel Hendrieckx<sup>2,3</sup> Dominika Kwasnicka<sup>4,5</sup> Jane Speight<sup>2,3</sup> Leanne Cussen<sup>6</sup> Felicia Ching Siew Ho<sup>7</sup> Jon Emery<sup>8</sup> Jo-Anne Manski-Nankervis<sup>1</sup>

## Affiliations

1. Department of General Practice, University of Melbourne, Melbourne, Australia
2. School of Psychology, Deakin University, Geelong, Australia
3. The Australian Centre for Behavioural Research in Diabetes, Diabetes Victoria, Melbourne, Australia
4. NHMRC CRE in Digital Technology to Transform Chronic Disease Outcomes, Melbourne School of Population and Global Health, University of Melbourne, Melbourne, Australia
5. Faculty of Psychology, SWPS University of Social Sciences and Humanities, Wroclaw, Poland
6. Department of Endocrinology, Beaumont Hospital, Dublin, Ireland
7. Melbourne Medical School, University of Melbourne, Melbourne, Australia
8. Department of General Practice and Centre for Cancer Research, University of Melbourne, Melbourne, Australia

## Corresponding Author

Dr Rita McMorrow, Department of General Practice, Level 3, 780 Elizabeth St., University of Melbourne, Victoria 3010, Australia

**Email** [rita.mcmorrow@unimelb.edu.au](mailto:rita.mcmorrow@unimelb.edu.au)

## Abstract

**Objectives:** This study examined the effect of using Patient-Reported Outcome Measures

(PROMs) routinely to assess and address depressive symptoms and diabetes distress among adults with type 2 diabetes.

**Design:** A systematic review of published peer-reviewed studies.

**Data Sources:** Medline, Embase, CINAHL Complete, PsycInfo, The Cochrane Library, and Cochrane Central Register of Controlled Trials were searched.

**Eligibility criteria:** Studies including adults with type 2 diabetes, published in English, from the inception of the databases to 3 August 2020 inclusive; and where the intervention included completion of a PROM of depressive symptoms and/or diabetes distress, with feedback of the responses to a healthcare professional.

**Data extraction and synthesis:** Using Covidence software, screening and risk of bias assessment were conducted by two reviewers independently with any disagreements resolved by a third reviewer.

**Results:** The search identified 3,581 citations, of which 147 full-text citations were assessed for eligibility, and eight studies met the inclusion criteria. Four studies involved assessment of depressive symptoms only, two studies assessed diabetes distress only, and two studies assessed both. All studies had an associated co-intervention. When depressive symptoms were assessed (n=6), a statistically significant between-group difference in depressive symptoms was observed in five studies; with a clinically significant ( $\geq 0.5\%$ ) between-group difference in HbA1c in one study. Diabetes distress was also assessed in this study. When diabetes distress was assessed (n=4), one study demonstrated statistically significant difference in depressive symptoms and diabetes distress; with a clinically significant between-group difference in HbA1c observed in two studies.

**Conclusion:** Studies are sparse in which PROMs are used to assess and address depressive symptoms or diabetes distress during routine clinical care of adults with type 2 diabetes. Further research is warranted to understand how to integrate PROMs into clinical care efficiently and determine appropriate interventions to manage identified problem areas.

**PROSPERO registration number:** CRD42020200246

## Article Summary

### Strengths and limitations of this study

- The review focuses on depressive symptoms and diabetes distress in people with type 2 diabetes, an important aspect of diabetes management.
- Systematic searching of five databases with independent review of abstracts and studies by two reviewers.
- Meta-analysis was not possible due to heterogeneity in method and frequency of PROM completion, communication of PROM responses to healthcare professionals, and differing associated co-interventions.

### Keywords

Diabetes Mellitus, Type 2, Depression, Patient Reported Outcome Measures

**Word Count: 3298**

## Introduction

Type 2 diabetes is a global health priority, with an estimated 463 million people with diabetes in 2017, set to rise to 700 million people in 2045.<sup>1</sup> Up to four in ten adults with type 2 diabetes experience emotional health problems, such as depression, anxiety, and diabetes distress.<sup>2 3</sup> While depression is a *general* negative affect; diabetes distress is the negative emotional or affective response specific to the day-to-day living with diabetes.<sup>3-5</sup> The relationship between diabetes distress and depressive symptoms is bi-directional: elevated diabetes distress is a predictor of future depression, and depression predicts future diabetes distress.<sup>6 7</sup> While early studies have linked depressive symptoms to sub-optimal glycaemia;<sup>8</sup> more recent research has demonstrated that diabetes distress affects glycaemia more than depressive symptoms.<sup>5 9</sup> Elevated depressive symptoms and diabetes distress are associated with reduced diabetes self-care and increased risk of diabetes-related complications, impaired quality of life, mortality, and an estimated 50% increase in healthcare costs.<sup>6 10-15</sup> Recent systematic reviews have focused on interventions for the management of diabetes distress; however, the first step is to identify people with depressive symptoms or diabetes distress requiring interventions in clinical practice.<sup>16-18</sup>

Guidelines have acknowledged the importance of assessing psychological well-being as part of diabetes care for over 25 years.<sup>19</sup> Given the growing evidence that diabetes-tailored psychological interventions reduce elevated distress and glycaemia, international diabetes guidelines have issued recommendations for routine assessment of depressive symptoms and diabetes distress.<sup>16 20-25</sup> Guidelines vary in terms of the specific patient-reported outcome measures (PROMs) recommended to assess depressive symptoms or diabetes distress. PROMs are standardised, validated questionnaires to assess latent constructs such as emotional well-being, treatment satisfaction, perceived health or functional status, or health-related quality of life.<sup>26</sup> Recent consensus from the International Consortium of Health Outcomes Measurement (ICHOM) recommends standardising the assessment of diabetes distress, depressive symptoms and general emotional well-being – with use of the Problem Areas In Diabetes (PAID) scale,

1  
2  
3 Patient Health Questionnaire – 9 (PHQ-9) and World Health Organisation – Five Well-Being Index  
4 (WHO-5), respectively – within clinical diabetes care.<sup>27</sup>  
5  
6  
7

8  
9 Despite these recommendations for using PROMs, 60% of healthcare professionals only discuss  
10 emotional issues if initiated by the person with diabetes.<sup>28</sup> Healthcare professionals need  
11 efficient systems to both assess and address depressive symptoms and diabetes distress as part  
12 of routine diabetes care.<sup>3</sup> For healthcare professionals to use PROMs, they need to understand  
13 the utility of PROMs in supporting people with type 2 diabetes clinically, not just for audit or  
14 research purposes,<sup>29 30</sup> and they need guidance in how to use and interpret PROM responses in  
15 clinical consultations.<sup>31 32</sup>  
16  
17  
18  
19  
20  
21  
22

23 Thus, the aim of this systematic review is to examine the effect of using PROMs routinely to assess  
24 and address depressive symptoms and/or diabetes distress among adults with type 2 diabetes  
25 on: (1) glycaemia as measured by HbA1c; (2) self-reported depressive symptoms or diabetes  
26 distress; (3) self-reported general emotional well-being or health-related quality of life; (4) self-  
27 reported diabetes self-management; (5) referrals for psychiatric or psychological therapy; (6)  
28 self-reported quality of patient-professional communication; and (7) self-reported satisfaction  
29 with the consultation.  
30  
31  
32  
33  
34  
35  
36  
37

## 38 **Methods**

39  
40 The protocol for this systematic review has been published,<sup>33</sup> and the methods are summarised  
41 below. We followed the Preferred Reporting Items for Systematic Reviews and Meta-Analyses  
42 (PRISMA) guidelines.<sup>34</sup> This systematic review is registered on the International Prospective  
43 Register of Systematic Reviews (PROSPERO: CRD42020200246).  
44  
45  
46  
47  
48

### 49 **Eligibility criteria**

50  
51 *Inclusion criteria:* Studies were eligible if: the design was a randomised controlled trial (RCT),  
52 interrupted time-series study, (prospective or retrospective) cohort study, case-control study, or  
53 analytical cross-sectional study; participants were adults (18 years or older) with type 2 diabetes  
54  
55  
56  
57  
58  
59



1  
2  
3 from any country; interventions involved a) participants completing a PROM for depressive  
4 symptoms and/or diabetes distress *and* b) use of PROM responses by the healthcare professional  
5 in consultation with the person with type 2 diabetes.  
6  
7  
8  
9

10 *Exclusion criteria:* Studies were excluded if they involved: people under 18 years of age, type 1  
11 diabetes or gestational diabetes; or the collection of PROM data but no use of the data in the  
12 clinical consultation.  
13  
14  
15

### 16 **Data sources and searches**

17  
18 A systematic search strategy was used to identify studies. The search was limited to papers  
19 published in English and before 3<sup>rd</sup> of August 2020. The search strategy was developed in  
20 consultation with a librarian from a biomedical library (complete search strategy: Supplementary  
21 Document 1). Databases searched included MEDLINE (Ovid), EMBASE (Ovid), CINAHL Complete  
22 (EBSCO), APA PsycInfo (Ovid), The Cochrane Library (Ovid), and Cochrane Central Register of  
23 Controlled Trials (Ovid).  
24  
25  
26  
27  
28  
29  
30  
31

### 32 **Study selection and data extraction**

33  
34 Two reviewers (RM and a second member of the review team (JMN, BH, LC, DK or FCSH))  
35 screened studies independently based on the inclusion criteria using Covidence software. Both  
36 reviewers screened the title and abstract of all eligible studies, followed by full-text screening of  
37 the shortlisted studies. Any disagreements about selection, assessment, and data extraction in  
38 the included studies were discussed between the two reviewers, and if required, a third reviewer  
39 was involved in the discussion. Reference lists were not checked for studies. Data extraction was  
40 undertaken by RM with 20% checked by LC. The extracted data were: study settings, participants,  
41 description of the interventions, comparators, study duration, length of follow-up, and outcome  
42 measures. The authors of the selected studies were contacted for additional data (when  
43 published details were insufficient), with one month allowed for response.  
44  
45  
46  
47  
48  
49  
50  
51  
52  
53

### 54 **Quality assessment**

1  
2  
3 Eligible studies were assessed for risk of bias by two reviewers (RM and a second member of the  
4 review team (JMN, BH or DK)) independently using the Cochrane Risk of Bias 2 tool.<sup>35</sup> Any  
5 disagreements were discussed between the two reviewers, and if required, a third reviewer was  
6 involved in the discussion.  
7  
8  
9

### 10 11 12 **Data synthesis**

13  
14 Due to heterogeneity regarding method and frequency of PROM completion, communication of  
15 PROM responses to healthcare professionals and differing associated co-interventions (actions  
16 based on PROM responses) it was not possible to conduct a meta-analysis. Therefore, the results  
17 are summarised narratively.  
18  
19  
20  
21  
22

### 23 **Patient and Public Involvement**

24  
25 Patients or public were not involved in the conduct of this systematic review.  
26  
27  
28

### 29 **Ethics approval**

30  
31 This is a systematic review, ethical approval was not required.  
32

### 33 **Results**

34 The systematic search identified 3,581 citations, of which 147 full-text citations were assessed  
35 for eligibility, and eight studies met the inclusion criteria (Figure 1).  
36  
37  
38

39  
40 *Insert Figure 1 here*  
41  
42

43 Figure 1 PRISMA Flow Diagram<sup>34</sup>  
44  
45  
46  
47  
48  
49  
50

### 51 **Characteristics of included studies**

52  
53 The eight included studies were published between 2009 and 2019 (Table 1). The overall number  
54 of participants across all eight studies was N=2850, ranging from N=40 to N=1,306 per study. Five  
55  
56  
57  
58  
59  
60

1  
2  
3 of the eight studies were conducted in the USA,<sup>36-40</sup> with the remainder conducted in Australia,<sup>41</sup>  
4 Germany,<sup>42</sup> and Iceland.<sup>43</sup> Most study designs were RCTs (n=7),<sup>36 37 39 40-43</sup> one of which was a  
5 pilot study (n=1),<sup>41</sup> and one was an observational study (n=1).<sup>38</sup> Clinical settings varied across  
6 studies, including: general practice (n=3);<sup>37 39 40</sup> both primary care and hospital clinics (n=2);<sup>36 38</sup>  
7 specialist outpatient clinic (n=2);<sup>41 43</sup> and a specialist rehabilitation service (n=1).<sup>42</sup>  
8  
9  
10  
11  
12  
13

14 *Insert Table 1 here*  
15  
16  
17  
18  
19  
20  
21  
22  
23  
24  
25  
26  
27  
28  
29  
30  
31  
32  
33  
34  
35  
36  
37  
38  
39  
40  
41  
42  
43  
44  
45  
46  
47  
48  
49  
50  
51  
52  
53  
54  
55  
56  
57  
58  
59  
60

Table 1. Study characteristics

| Author (year)<br>Country                                    | Clinical setting                                                                                | Study design and n per arm                                  | Intervention PROM     | Method and frequency of PROM completion                                     | Summary of actions based on PROM responses                                                                                                                                                                                                                                  | Control arm                                                                                                     |
|-------------------------------------------------------------|-------------------------------------------------------------------------------------------------|-------------------------------------------------------------|-----------------------|-----------------------------------------------------------------------------|-----------------------------------------------------------------------------------------------------------------------------------------------------------------------------------------------------------------------------------------------------------------------------|-----------------------------------------------------------------------------------------------------------------|
| <b>Cummings et al. (2019)</b> <sup>39</sup><br><b>USA</b>   | Adults with symptoms of distress and/or depression attending general practice                   | 12-month RCT: Intervention n=67/ usual care n=72            | PHQ-9*<br>DDS-17**    | In-person completion with trained study team member twice, six months apart | Stratified treatment to 16 sessions of cognitive behavioural therapy or lifestyle coaching based on PROM responses                                                                                                                                                          | Educational materials and usual care with GP.                                                                   |
| <b>Dobler et al. (2018)</b> <sup>42</sup><br><b>Germany</b> | Adults attending specialist outpatient clinic, recruitment during inpatient rehabilitation stay | 12-month RCT: Intervention n=98 / Control n=101             | PAID**, WHO-5, PHQ-9* | Telephone completion with trained study team member, monthly                | Behaviour motivation plan developed. Monthly follow-up telephone calls using PHQ-2 (with progression to PHQ9 if PHQ score $\geq 3$ ) to identify and address emotional problems. Severity of symptoms guided counseling techniques, increase in call frequency, or referral | Written information on diet, physical activity by mail at 3 and 9 months.                                       |
| <b>Ell et al. (2011)</b> <sup>37</sup><br><b>USA</b>        | Adults with PHQ9 response $\geq 10$ , attending primary care safety net clinics                 | 24-month RCT: Intervention n=193/ Enhanced usual care n=194 | PHQ-9*                | Telephone completion with trained study team member once                    | Collaborative care model using structured stepped-care algorithm, with patient preferences for problem-solving therapy or anti-depressants guiding treatment                                                                                                                | Standard care, depression educational pamphlets and social resource list. GPs informed of depression diagnosis. |
| <b>Johnson et al. (2014)</b> <sup>40</sup><br><b>USA</b>    | Adults with PHQ >10, attending                                                                  | 12-month RCT: Intervention n=95 / Active                    | PHQ-9*                | Telephone completion with trained study                                     | Case-managers delivered individualised care, in collaboration with psychiatrist and                                                                                                                                                                                         | GP notified by letter of elevated PHQ-9 responses.                                                              |

| Author (year)<br>Country                                            | Clinical setting                                                                                               | Study design and n per arm                                        | Intervention PROM                                            | Method and frequency of PROM completion                                   | Summary of actions based on PROM responses                                                                                                                                                                  | Control arm                                                          |
|---------------------------------------------------------------------|----------------------------------------------------------------------------------------------------------------|-------------------------------------------------------------------|--------------------------------------------------------------|---------------------------------------------------------------------------|-------------------------------------------------------------------------------------------------------------------------------------------------------------------------------------------------------------|----------------------------------------------------------------------|
|                                                                     | general practice                                                                                               | control n=62/<br>usual care<br>n=71                               |                                                              | team member at least monthly until PHQ-9 <10                              | endocrinologist, with treatment recommendations to GP based on a treatment algorithm and PROM responses                                                                                                     |                                                                      |
| <b>Naik et al. (2019)</b> <sup>36</sup><br><b>USA</b>               | Adults with T2D attending hospital and outpatient community Veterans Affairs clinics                           | 12-month RCT: Intervention n=136 / Enhanced usual care (EUC) n=89 | PHQ-9*                                                       | Telephone completion with trained study team member once<br><br>12 months | Nine telephone coaching sessions with trained study members using workbooks guiding the discussion and tracking progress to set and assess goals related to wellness, diet, exercise medication management. | Participants informed of PHQ-9 responses with educational materials. |
| <b>Rees et al. (2017)</b> <sup>41</sup><br><b>Australia</b>         | Adults with diabetes related retinopathy and moderate diabetes distress attending specialist outpatient clinic | 6-month pilot RCT: Intervention n=21 / control n=19               | DDS**                                                        | In-person completion with trained study member once                       | PROM responses guided eight 45–60-minute problem solving therapy sessions                                                                                                                                   | Pamphlets on diabetes-specific topics                                |
| <b>Sigurdardottir et al. (2009)</b> <sup>43</sup><br><b>Iceland</b> | Adults attending specialist outpatient clinic                                                                  | 6-month RCT: Intervention n=28 / Control n=25                     | PAID**<br>DKT, DES,<br>Summary of diabetes self-care measure | In-person completion at clinic with diabetes educator once                | Diabetes educators delivered individual educational sessions based on empowerment theory. PROM responses identified barriers to goals with a weekly follow-up call for five weeks                           | Information booklet about T2D and attended usual diabetes clinics.   |
| <b>Wu et al. (2018)</b> <sup>38</sup>                               | Adults attending                                                                                               | 6-month observational:                                            | PHQ-2,<br>PHQ-9*                                             | Initially completed via                                                   | PROM responses linked to clinical decision support that generated                                                                                                                                           | Standard primary care. GPs offered optional training.                |

| Author (year)<br>Country | Clinical setting                                  | Study design and n per arm                                                      | Intervention PROM | Method and frequency of PROM completion                                                      | Summary of actions based on PROM responses                                | Control arm |
|--------------------------|---------------------------------------------------|---------------------------------------------------------------------------------|-------------------|----------------------------------------------------------------------------------------------|---------------------------------------------------------------------------|-------------|
| USA                      | primary care or hospital-based safety net clinics | Technology-facilitated care n=432/<br>supported care n=461/<br>usual care n=416 |                   | telephone with trained study member. Then monthly – quarterly completion via automated calls | action reminders for healthcare professionals depending on PROM responses |             |

\*depression, \*\*diabetes distress

DDS: Diabetes Distress Scale; DES: Diabetes Empowerment Scale; DKT: Diabetes Knowledge Test; GP: general practitioner; PAID: Problem Area In Diabetes scale, PHQ: Patient Health Questionnaire (2 items or 9 items), WHO-5: The World Health Organisation Five-item Well-Being Index

### Risk of bias of included studies

Five of the eight studies were rated as having a low risk of bias (Table 2).<sup>37 39-41 43</sup> Methodological concerns were observed in three studies.<sup>36 38 42</sup> Dobber *et al.* reported outcomes for 98 of the 123 participants randomised to the intervention group and did not state how missing outcomes were dealt with; intention to treat was not reported.<sup>42</sup> Wu *et al.* assigned participants to intervention groups based on the clinic attended with non-random allocation.<sup>38</sup> Naik *et al.* reported 12-month outcome data for only 90 of the 136 intervention participants; intention to treat was not reported.<sup>36</sup> In most studies, due to the study design, participants and study team members could not be blinded to participants' group allocation. Two studies had small sample sizes.<sup>41 43</sup>

*Insert Table 2 here*

Table 2. Risk of bias assessment

| Author (year)                              | Randomisation process | Deviations from intended interventions | Missing outcome data | Measurement of the outcome | Selection of the reported result | Overall Bias  |
|--------------------------------------------|-----------------------|----------------------------------------|----------------------|----------------------------|----------------------------------|---------------|
| Cummings et al. (2019) <sup>39</sup>       | Low                   | Low                                    | Low                  | Low                        | Low                              | Low           |
| Dobler et al. (2018) <sup>42</sup>         | Low                   | Low                                    | High                 | Low                        | Low                              | Some concerns |
| Ell et al. (2011) <sup>37</sup>            | Low                   | High                                   | Low                  | Low                        | Low                              | Low           |
| Johnson et al. (2014) <sup>40</sup>        | Some concerns         | Low                                    | Low                  | Low                        | Low                              | Low           |
| Naik et al. (2019) <sup>36</sup>           | Low                   | Low                                    | Some concerns        | Low                        | Low                              | Some concerns |
| Rees et al. (2017) <sup>41</sup>           | Low                   | Low                                    | Low                  | Low                        | Low                              | Low           |
| Sigurdardottir et al. (2009) <sup>43</sup> | Low                   | Some concerns                          | Low                  | Low                        | Low                              | Low           |
| Wu et al. (2018) <sup>38</sup>             | Some concerns         | Low                                    | Some concerns        | Some concerns              | Low                              | Some concerns |

Risk of bias as assessed using the Risk of Bias 2.<sup>35</sup>



## Intervention

### *Interventions to assess depressive symptoms and/or diabetes distress*

Four of the eight studies assessed depressive symptoms alone,<sup>36-38 40</sup> two assessed depressive symptoms and diabetes distress,<sup>39 42</sup> and two assessed diabetes distress alone.<sup>41 43</sup> All six studies assessing depressive symptoms used the Patient Health Questionnaire (PHQ).<sup>36-40 42</sup> One study used the PHQ-2 for brief screening with responses of more than three proceeding to the PHQ-9.<sup>38</sup> Diabetes distress was assessed in two studies using the Diabetes Distress Scale (DDS),<sup>39 41</sup> and in two studies using the Problem Areas In Diabetes (PAID) scale.<sup>42 43</sup>

PROMs were completed either in-person (n=4),<sup>39-42</sup> or via telephone (n=4).<sup>36-38 43</sup> In six studies, PROM responses were collected by study team members not involved in ongoing clinical care,<sup>36 37 39-42</sup> either via telephone,<sup>36 37 40 42</sup> or at the clinic with a study team member.<sup>39 41</sup> One study collected PROM responses using automated calls.<sup>38</sup> In one study, PROM completion was at the clinic with the diabetes educator.<sup>43</sup>

Feedback of PROM responses provided to treating healthcare professionals varied. Two studies trained case managers in making treatment recommendations to primary care health professionals based on case collaboration and treatment algorithms.<sup>37 40</sup> In studies where trained study members collected PROM responses, the mechanism by which PROM data was provided to the treating healthcare professionals was not reported.<sup>41 42</sup> In the Naik *et al.* study, the general practitioner received a secure message notifying the HbA1c results and PHQ-9 response.<sup>36</sup> Wu *et al.* used PHQ-9 responses to generate action reminders integrated with the disease management registry for healthcare professionals to review.<sup>38</sup>

### *Co-intervention associated with PROM responses*

Each of the eight studies had a co-intervention associated with the PROM completion (see Table 1), which included telephone-assisted psychological therapy or coaching interventions,<sup>36 39 41-43</sup> or healthcare professional interventions of collaborative team care with case management and stepped care treatment algorithms.<sup>37 40</sup> Wu *et al.* linked PROM responses to a clinical decision

1  
2  
3 support tool that generated action reminders for healthcare professionals based on PROM  
4 responses within a disease management register.<sup>38</sup>  
5  
6  
7

8 *Insert Table 3 here*  
9  
10  
11  
12  
13  
14  
15  
16  
17  
18  
19  
20  
21  
22  
23  
24  
25  
26  
27  
28  
29  
30  
31  
32  
33  
34  
35  
36  
37  
38  
39  
40  
41  
42  
43  
44  
45  
46  
47  
48  
49  
50  
51  
52  
53  
54  
55  
56  
57  
58  
59  
60

For peer review only

1  
2  
3  
4  
5  
6  
7  
8  
9  
10  
11  
12  
13  
14  
15  
16  
17  
18  
19  
20  
21  
22  
23  
24  
25  
26  
27  
28  
29  
30  
31  
32  
33  
34  
35  
36  
37  
38  
39  
40  
41  
42  
43  
44  
45  
46  
47

Table 3 Follow-up study outcomes between intervention and control groups

| Author (year)<br>Country                                    | Intervention<br>PROM | Length<br>of<br>follow<br>up | HbA1c                                                | Depressive<br>symptoms                                                              | Diabetes distress                                          | Other PROM<br>outcomes                                    | Self-management                              |
|-------------------------------------------------------------|----------------------|------------------------------|------------------------------------------------------|-------------------------------------------------------------------------------------|------------------------------------------------------------|-----------------------------------------------------------|----------------------------------------------|
| <b>Cummings et al. (2019)</b> <sup>39</sup><br><b>USA</b>   | PHQ-9* DDS-17**      | 12 months                    | 8.9% (2.1) vs 9% (2.2)<br>p = 0.06                   | PHQ-9: 6.3 (5.9) vs. 7.9 (7)<br>p = 0.01                                            | DDS (RDD): 2.1 (1.2) vs 2.6 (1.3)<br>p = 0.0001            | Not assessed                                              | SDSCA: 4.3 (1.4) vs. 3.98 (1.3) p = 0.03     |
| <b>Dobler et al. (2018)</b> <sup>42</sup><br><b>Germany</b> | PAID**, PHQ-9*       | 12 months                    | mean change -0.7% (1.4) vs. 0.1% (1.7)<br>p = 0.006  | PHQ-9: mean change -1.35 (4.3) vs. -0.23 (4.9)<br>p = 0.057                         | PAID: mean change - 4.77 (14.4) vs. -1.4 (17)<br>p = 0.069 | WHO-5: 1.23 (5.7) vs. 0.1 (5.8)<br>p = 0.044              | Not assessed                                 |
| <b>Ell et al. (2011)</b> <sup>37</sup><br><b>USA</b>        | PHQ-9*               | 24 months                    | 9.1% (0.29) vs. 8.9% (0.29)<br>p = 0.42              | PHQ-9 (reported as >50% reduction): adjusted OR=1.87, 95%CI [1.05–3.32]<br>p = 0.03 | Not assessed                                               | SF-12 mental: 44.76 (1.150) vs. 42.48 (1.17)<br>p = 0.001 | SDSCA: 3.6 (0.15) vs. 3.41 (0.2)<br>p = 0.26 |
| <b>Johnson et al. (2014)</b> <sup>40</sup><br><b>USA</b>    | PHQ-9*               | 12 months                    | mean change: -0.2% (1.3) vs. -0.2% (1.1)<br>p = 0.47 | PHQ-9: 7.1 (5.4) vs. 9.4 (5.9)<br>p = <0.001                                        | PAID-5: mean change -0.6 (0.8) vs. 0.2 (0.9)<br>p = 0.03   | EQ-5D: mean change 0.03 (0.1) vs. 0.04 (0.12) p = 0.23    | Not assessed                                 |
| <b>Naik et al. (2019)</b> <sup>36</sup><br><b>USA</b>       | PHQ-9*               | 12 months                    | 8.7% (1.6) vs 8.9% (2)<br>p = 0.83                   | PHQ-9: 10.1 (6.9) vs 12.6 (6.5)<br>p = 0.03                                         | Not assessed                                               | Not assessed                                              | Not assessed                                 |
| <b>Rees et al. (2017)</b> <sup>41</sup><br><b>Australia</b> | DDS**                | 6 months                     | 7.1% (1.1) vs. 8.4% (2.5)<br>p = 0.093               | PHQ-9: 6.7 (5.9) vs. 9.9 (6.5)<br>p = 0.144                                         | DDS: 2.2 (1.1) vs. 2.5 (0.8)<br>p = 0.427                  | Not assessed                                              | SDSCA diet: 6.1 (1.1) vs. 5 (1.5) p = 0.026  |

| Author (year)<br>Country                                                | Intervention<br>PROM | Length<br>of<br>follow<br>up | HbA1c                                       | Depressive<br>symptoms                               | Diabetes distress                                    | Other PROM<br>outcomes                                                                                                                          | Self-management                                     |
|-------------------------------------------------------------------------|----------------------|------------------------------|---------------------------------------------|------------------------------------------------------|------------------------------------------------------|-------------------------------------------------------------------------------------------------------------------------------------------------|-----------------------------------------------------|
| <b>Sigurdardottir<br/>et al. (2009)</b> <sup>43</sup><br><b>Iceland</b> | PAID**               | 6<br>months                  | 8.0% (1.16) vs.<br>7.8% (.081)<br>p = 0.399 | Not assessed                                         | PAID:<br>19.1 (12.9) vs. 13.8<br>(12.6)<br>p = 0.239 | WBQ-12:<br>28.4 (6.1) vs. 27.4<br>(5.6)<br>p = 0.544                                                                                            | SDSCA diet:<br>3.6 (0.4) vs. 3.4 (0.5)<br>p = 0.122 |
| <b>Wu et al.<br/>(2018)</b> <sup>38</sup><br><b>USA</b>                 | PHQ-2, PHQ-<br>9*    | 6<br>months                  | 8.1% (0.16) vs.<br>8.0% (0.17)<br>p = 0.57  | PHQ-9:<br>5.16 (0.48) vs. 6.35<br>(0.49)<br>p = 0.02 | Not assessed                                         | SF-12 mental:<br>49.87 (1.02) vs.<br>48.38 (1.04)<br>p = 0.17<br>Satisfaction with<br>diabetes care<br>4.20 (0.09) vs. 4.01<br>(0.09)<br>p=0.05 | SDSCA: 4.78 (0.12)<br>vs. 4.66 (0.13)<br>p = 0.38   |

Outcome data are always presented as intervention vs control. Note, Wu et al was an observational study involving three groups, with data related to intervention vs usual care represented here.

Other PROM outcomes included general emotional well-being, mental health and health status, as well as satisfaction with diabetes care

DDS: Diabetes Distress Scale; 5-level EQ-5D: EuroQoL Five Dimensions; PAID: Problem Area in Diabetes scale, PHQ: Patient Health Questionnaire, RDD: Regimen-related Diabetes Distress (a subscale of the DDS); SDSCA: Summary of Diabetes Self-Care Activities, SF-12: 12-Item Short-Form Survey, WBQ: Well-being Questionnaire; WHO-5: The World Health Organisation Five-item Well-Being Index,

## Outcomes

Reported outcomes across studies are detailed in Table 3. Referrals to psychology or psychiatry services were not reported. In three studies, in the control arm, healthcare professionals were informed of the elevated depressive symptoms.<sup>36 37 40</sup> In no study were healthcare professionals informed about elevated diabetes distress of participants in the control group.

All eight studies reported glycaemia, measured by HbA1c, as an outcome measure. Where PROM assessed depressive symptoms (n=6), a clinically significant between-group difference in HbA1c was observed only when diabetes distress was also assessed.<sup>42</sup> Where diabetes distress was assessed (n=4), a clinically significant between-group difference in HbA1c was observed in two studies.<sup>41 42</sup> Each of these studies had a co-intervention involving a series of psychological therapy sessions.<sup>41 42</sup> Studies using PROMs as part of stepped care algorithms with care coordination did not demonstrate a clinically or statistically significant glycaemic reduction.<sup>37 40</sup>

All but one study<sup>43</sup> examined the impact of PROMs use on depressive symptoms. Across all seven studies, depressive symptoms (measured with the PHQ-9) reduced in both arms. Where the intervention included assessment of depressive symptoms (n=6), statistically significant difference in depressive symptoms between groups was observed in five studies.<sup>36-40</sup> Where diabetes distress was assessed during the intervention (n=4)<sup>39 41-43</sup>, three studies<sup>39 41 42</sup> reported depressive symptoms as an outcome measure, with a significant difference in depressive symptoms between groups observed in one study.<sup>39</sup> Five studies reported diabetes distress as an outcome measure.<sup>39-43</sup> Diabetes distress reduced in both the intervention and control arms across all five studies.<sup>39-43</sup> The difference between groups, favouring the intervention, was statistically significant in two studies.<sup>39 40</sup>

In the Cummings *et al.* study, when therapy was stratified based on elevated levels of depressive symptoms or diabetes distress, improved diabetes self-management was reported.<sup>39</sup> Similarly, in the Rees *et al.* study, when co-interventions focused on people with type 2 diabetes with elevated distress levels receiving individual psychological therapy, an improvement in diabetes

1  
2  
3 self-management was reported.<sup>41</sup> General emotional well-being, mental health and health status  
4 were reported using various measures, including the WHO-5, W-BQ, SF-12, and EQ-5D. No study  
5 reported patient-professional communication as an outcome. The Wu *et al.* study was the only  
6 one to assess satisfaction with diabetes care, and a statistically significant improvement in the  
7 intervention arm was observed.<sup>38</sup>  
8  
9  
10  
11  
12

## 13 14 Discussion

### 15 16 Main findings

17 To our knowledge, this is the first systematic review to synthesise the evidence related to PROM  
18 use to assess and address depressive symptoms and/or diabetes distress in type 2 diabetes care,  
19 despite diabetes guidelines recommending this practice for the past 25 years.<sup>20-25</sup> The key finding  
20 is that very few studies have examined the use of PROMs to assess and address depressive  
21 symptoms and/or diabetes distress during routine type 2 diabetes care. When depressive  
22 symptoms were assessed (n=6), a statistically significant between-group difference in HbA1c was  
23 observed in one study.<sup>42</sup> Diabetes distress was also assessed in this study.<sup>42</sup> A statistically  
24 significant between-group difference in depressive symptoms was observed in five of six studies  
25 where depressive symptoms were assessed during the intervention.<sup>36-40</sup> Where diabetes distress  
26 was assessed, a clinically significant between-group difference in HbA1c was observed in two of  
27 four studies,<sup>41 42</sup> and a statistically significant difference in both depressive symptoms and  
28 diabetes distress was observed in one study.<sup>39</sup> Two studies targeting people with elevated  
29 diabetes distress or depressive symptoms demonstrated statistically and clinically significant  
30 reductions in glycaemia.<sup>41 42</sup> This review found little evidence of the best-associated co-  
31 intervention for people identified by PROMs with elevated depressive symptoms or diabetes  
32 distress despite guideline recommendations.<sup>20-25</sup>  
33  
34  
35  
36  
37  
38  
39  
40  
41  
42  
43  
44  
45  
46  
47  
48

49 Similar to this review's findings, a Cochrane review of PROM completion and feedback to  
50 healthcare professionals in the treatment of mental health conditions found insufficient evidence  
51 of impact on patient outcomes.<sup>44</sup> However, the interventions included in the Cochrane review  
52 were limited to PROM feedback to the healthcare professional, not linked to interventions.<sup>44</sup>  
53  
54  
55  
56  
57  
58  
59

1  
2  
3 While healthcare professionals frequently treat co-existing depression and type 2 diabetes,  
4 emotional issues such as diabetes distress are discussed less frequently.<sup>28</sup> The most effective  
5 intervention to address PROM-identified elevated depressive symptoms or diabetes distress  
6 remains unclear. Details about how precisely PROMs were used by healthcare professionals in  
7 discussion with people with type 2 diabetes were lacking. Further exploration of how PROMs can  
8 be integrated into routine clinical practice with the escalation of care for people with elevated  
9 depressive symptoms or distress is needed. Considering the recent recommendations from  
10 ICHOM for PROM use during diabetes care,<sup>27</sup> healthcare professionals need guidance on the  
11 appropriate evidence-based intervention for elevated depressive symptoms or diabetes distress  
12 identified using a PROM in clinical practice.<sup>29 30</sup>

23 Studies demonstrating improved glycaemia had co-interventions of targeting people with  
24 elevated distress levels or depressive symptoms.<sup>41 42</sup> Dobber *et al.* increased frequency of follow-  
25 up counselling if elevated depressive symptoms were identified using the PHQ-9.<sup>42</sup> Sturt's  
26 systematic review regarding the effectiveness of interventions to reduce diabetes distress  
27 showed that interventions delivered by a general healthcare professional demonstrate an  
28 improvement in glycaemia and reduce diabetes distress.<sup>17</sup> However, participants included in  
29 Sturt's review had low levels of diabetes distress, and a further systematic review in 2018  
30 identified that severe diabetes distress reduced with diabetes-specific psychological  
31 interventions.<sup>16</sup> Evidentially, targeted interventions are needed stratified on the basis of severity  
32 of distress.

43 Studies have reported that completing a measure of diabetes distress before a consultation can  
44 improve glycaemia and patient satisfaction among adults with type 1 and type 2 diabetes.<sup>45</sup>  
45 However, only Wu *et al.* explored changes in patient satisfaction with care – which is an  
46 important measure considering PROMs are reported as enablers of person-centred care.<sup>46</sup> No  
47 studies in our review explored the impact on patient-professional communication in the  
48 consultation, despite evidence suggesting PROM use in other clinical settings (oncology)  
49 improves communication, with PROMs initiating discussion of issues not otherwise addressed.<sup>47</sup>

1  
2  
3  
4  
5 Studies have also indicated that completion of a diabetes distress measure before a consultation,  
6 and discussion of those responses during the consultation, improves glycaemia and reduces  
7 diabetes distress among adults with type 1 and type 2 diabetes in specialist diabetes clinics.<sup>7 45</sup>  
8  
9 Pouver *et al.*'s study of people with type 1 and type 2 diabetes found monitoring of well-being,  
10 using the Well-being Questionnaire (W-BQ), during diabetes care resulted in improved mood.<sup>48</sup>  
11  
12 While PROMs in these studies were embedded in routine care, they included people with type 1  
13 and type 2 diabetes (without separate sub-group analyses) and were not conducted in general  
14 practice, where most type 2 diabetes care occurs.<sup>49</sup> In our review, PROMs were completed most  
15 frequently with a trained study team member, not by a healthcare professional involved in the  
16 person's clinical care.<sup>36 37 39-42</sup> While this may replicate the likely real-world administration of  
17 PROMs (e.g. by a receptionist, upon arrival at the clinic), it is suggested that screening for  
18 depressive symptoms is best performed as part of collaborative care by the treating doctor or  
19 diabetes educator.<sup>50</sup> In the future, it would be useful to explore models based on depressive  
20 symptoms or diabetes distress identified by the usual healthcare professional with stratification  
21 of actions based on responses.  
22  
23  
24  
25  
26  
27  
28  
29  
30  
31  
32  
33

34 Healthcare professionals need PROMs that provide responses that provoke action. However, the  
35 effective interventions in this study were resource-intensive, which will be difficult to replicate  
36 and sustain in routine clinical practice. Only one study used electronic prompts to healthcare  
37 professionals based on PHQ responses.<sup>38</sup> Several studies have highlighted that clinical systems  
38 for PROM response delivery to healthcare professionals need to fit with clinical workflow.<sup>51-53</sup>  
39 Even with the electronic delivery of PROM responses, the large volume of responses for  
40 healthcare professionals to review and the difficulty accessing PROM responses (due to storage  
41 on a dashboard separate from the electronic medical record) contribute to low use of PROMs in  
42 clinical settings.<sup>52-54</sup>  
43  
44  
45  
46  
47  
48  
49  
50  
51  
52

### 53 **Strengths and limitations of the review**

54  
55  
56  
57  
58  
59  
60



1  
2  
3 Key strengths of this review include adherence to the PRISMA guidelines,<sup>34</sup> a comprehensive  
4 search strategy of five electronic databases, and screening performed independently by two  
5 reviewers. The risk of bias was low in most studies, indicating outcomes of this review are based  
6 on high-quality studies. Depression and diabetes distress were assessed using well-validated  
7 measures, including PHQ, PAID, and the DDS. The focus on type 2 diabetes is also a strength, as  
8 people with type 2 diabetes receive their care mostly in primary care settings, and their needs  
9 and preferences are different from people with type 1 diabetes.<sup>55 56</sup>  
10  
11  
12  
13  
14  
15  
16  
17

18 The heterogeneity of included co-interventions, how PROMs were completed, and healthcare  
19 professionals received the PROM responses, limits the overall review, making comparisons  
20 between studies difficult. It was not possible to conduct a meta-analysis because of the wide  
21 range of interventions and co-interventions assessed. Two studies had a small sample size with  
22 limited statistical power.<sup>41 43</sup> Other limitations include the restriction of our search to published  
23 journal articles in the English language. All studies included were from high-income or upper-  
24 middle-income countries, with no studies from low-middle income countries identified. The  
25 inclusion criteria limited studies to populations with type 2 diabetes only, or where a sub-group  
26 analysis of participants with type 2 diabetes was included.  
27  
28  
29  
30  
31  
32  
33  
34  
35

### 36 **Future directions**

37  
38 Considering the low number of eligible studies, further research is warranted to understand the  
39 most efficient co-interventions to associate with PROM responses and how to integrate PROMs  
40 to coordinate interventions in general practice where most type 2 diabetes care occurs. The  
41 interventions examined as part of this review required significant external staff involvement,  
42 while only one study used technology to assist with PROM collection and delivery to healthcare  
43 professionals. Future research could focus on similar interventions using technology for self-  
44 completing PROMs with actionable outcomes if elevated depressive symptoms or diabetes  
45 distress are identified. Further research is needed to explore if PROM assessment of depressive  
46 symptoms and diabetes distress in routine type 2 diabetes care impacts communication and  
47 patient satisfaction with care.  
48  
49  
50  
51  
52  
53  
54  
55  
56  
57  
58  
59  
60

## Conclusions

This systematic review summarized and critiqued studies using PROMs for assessing and addressing depressive symptoms and/or diabetes distress as part of clinical type 2 diabetes care. The findings showed few studies using PROMs, but most are effective in reducing depressive symptoms or diabetes distress, though co-interventions related to PROM use in type 2 diabetes care are heterogeneous. While guidelines recommend the routine assessment of depressive symptoms and diabetes distress using PROMs, a clear mechanism for implementing this in routine diabetes care or the most effective co-intervention is yet to be established.

**PROSPERO registration number:** CRD42020200246

## Funding

Dr Rita McMorrow receives a PhD scholarship from Australian Rotary Health and the University of Melbourne (Grant number is not applicable). CH and JS are supported by core funding to the Australian Centre for Behavioural Research in Diabetes provided by the collaboration between Diabetes Victoria and Deakin University.

## Competing Interests

The authors have no competing interests to declare.

## Acknowledgements

The authors acknowledge the support of the University of Melbourne librarians Wil Villareal and Patrick Condon with preparing the search strategy.

## Author contributions

RM, JMN, BH, JE, JS, and CH conceived the study. RM, JMN, BH, DK, LC and FH performed the citation screening and risk of bias assessments. RM extracted the data with 20% also extracted

1  
2  
3  
4  
5  
6  
7  
8  
9  
10  
11  
12  
13  
14  
15  
16  
17  
18  
19  
20  
21  
22  
23  
24  
25  
26  
27  
28  
29  
30  
31  
32  
33  
34  
35  
36  
37  
38  
39  
40  
41  
42  
43  
44  
45  
46  
47  
48  
49  
50  
51  
52  
53  
54  
55  
56  
57  
58  
59  
60

by LC. RM drafted the manuscript and revised it based on the feedback from co-authors. All authors approved the manuscript for submission.

For peer review only

## References

1. Saeedi P, Petersohn I, Salpea P, et al. Global and regional diabetes prevalence estimates for 2019 and projections for 2030 and 2045: Results from the International Diabetes Federation Diabetes Atlas, 9th edition. *Diabetes research and clinical practice* 2019;157:107843. doi: <https://doi.org/10.1016/j.diabres.2019.107843>
2. Peyrot M, Rubin RR, Lauritzen T, et al. Psychosocial problems and barriers to improved diabetes management: results of the Cross-National Diabetes Attitudes, Wishes and Needs (DAWN) Study. *Diabetic medicine : a journal of the British Diabetic Association* 2005;22(10):1379-85. doi: 10.1111/j.1464-5491.2005.01644.x [published Online First: 2005/09/24]
3. Skinner TC, Joensen L, Parkin T. Twenty-five years of diabetes distress research. *Diabetes medicine* 2020;37(3):393-400. doi: 10.1111/dme.14157
4. Snoek FJ, Bremmer MA, Hermanns N. Constructs of depression and distress in diabetes: time for an appraisal. *The lancet Diabetes & endocrinology* 2015;3(6):450-60. doi: 10.1016/s2213-8587(15)00135-7 [published Online First: 2015/05/23]
5. Fisher L, Mullan JT, Arean P, et al. Diabetes distress but not clinical depression or depressive symptoms is associated with glycemic control in both cross-sectional and longitudinal analyses. *Diabetes care* 2010;33(1):23-8. doi: 10.2337/dc09-1238 [published Online First: 2009/10/20]
6. Nanayakkara N, Pease A, Ranasinha S, et al. Depression and diabetes distress in adults with type 2 diabetes: results from the Australian National Diabetes Audit (ANDA) 2016. *Sci Rep* 2018;8(1):7846-46. doi: 10.1038/s41598-018-26138-5
7. Snoek FJ, Kersch NYA, Eldrup E, et al. Monitoring of Individual Needs in Diabetes (MIND)-2: follow-up data from the cross-national Diabetes Attitudes, Wishes, and Needs (DAWN) MIND study. *Diabetes care* 2012;35(11):2128-32. doi: <https://dx.doi.org/10.2337/dc11-1326>
8. Lustman PJ, Anderson RJ, Freedland KE, et al. Depression and poor glycemic control: a meta-analytic review of the literature. *Diabetes care* 2000;23(7):934-42. doi: 10.2337/diacare.23.7.934 %J Diabetes Care
9. Aikens JE. Prospective associations between emotional distress and poor outcomes in type 2 diabetes. *Diabetes care* 2012;35(12):2472-8. doi: <https://dx.doi.org/10.2337/dc12-0181>
10. Fisher L, Mullan JT, Skaff MM, et al. Predicting diabetes distress in patients with Type 2 diabetes: a longitudinal study. *Diabetic medicine : a journal of the British Diabetic Association* 2009;26(6):622-7. doi: 10.1111/j.1464-5491.2009.02730.x [published Online First: 2009/06/23]
11. Pintaudi B, Lucisano G, Gentile S, et al. Correlates of diabetes-related distress in type 2 diabetes: Findings from the benchmarking network for clinical and humanistic outcomes in diabetes (BENCH-D) study. *Journal of psychosomatic research* 2015;79(5):348-54. doi: <https://dx.doi.org/10.1016/j.jpsychores.2015.08.010>
12. Goldney RD, Phillips PJ, Fisher LJ, et al. Diabetes, depression, and quality of life: a population study. *Diabetes care* 2004;27(5):1066-70. doi: 10.2337/diacare.27.5.1066 [published Online First: 2004/04/28]

13. Hutter N, Schnurr A, Baumeister H. Healthcare costs in patients with diabetes mellitus and comorbid mental disorders—a systematic review. *Diabetologia* 2010;53(12):2470-79. doi: 10.1007/s00125-010-1873-y
14. Gilmer TP, O'Connor PJ, Rush WA, et al. Predictors of health care costs in adults with diabetes. *Diabetes care* 2005;28(1):59-64. doi: 10.2337/diacare.28.1.59 [published Online First: 2004/12/24]
15. Park M, Katon WJ, Wolf FM. Depression and risk of mortality in individuals with diabetes: a meta-analysis and systematic review. *General Hospital Psychiatry* 2013;35(3):217-25. doi: <https://doi.org/10.1016/j.genhosppsych.2013.01.006>
16. Schmidt CB, van Loon BJP, Vergouwen ACM, et al. Systematic review and meta-analysis of psychological interventions in people with diabetes and elevated diabetes-distress. *Diabetic medicine : a journal of the British Diabetic Association* 2018 doi: <https://dx.doi.org/10.1111/dme.13709>
17. Sturt J, Dennick K, Hessler D, et al. Effective interventions for reducing diabetes distress: systematic review and meta-analysis. *International Diabetes Nursing* 2015;12(2):40-55. doi: 10.1179/2057332415Y.0000000004
18. Chew BH, Vos RC, Metzendorf MI, et al. Psychological interventions for diabetes-related distress in adults with type 2 diabetes mellitus. *The Cochrane database of systematic reviews* 2017;9:Cd011469. doi: 10.1002/14651858.CD011469.pub2 [published Online First: 2017/09/28]
19. Speight J, Hendrieckx C, Pouwer F, et al. Back to the future: 25 years of 'Guidelines for encouraging psychological well-being' among people affected by diabetes. *Diabetic Medicine* 2019;n/a(n/a) doi: 10.1111/dme.14165
20. Bradley C, Gamsu DS, Diabetes PW-bWGotWISVDAPf. Guidelines for Encouraging Psychological Well-being. 1994;11(5):510-16. doi: 10.1111/j.1464-5491.1994.tb00316.x
21. Committee DCCPGE. Diabetes Canada 2018 Clinical Practice Guidelines for the Prevention and Management of Diabetes in Canada. *Can J Diabetes* 2018;42
22. Federation ID. Recommendations For Managing Type 2 Diabetes In Primary Care, 2017.
23. Garber AJ, Abrahamson MJ, Barzilay JI, et al. Consensus Statement by the American Association of Clinician Endocrinologists and American College of Endocrinology on the Comprehensive Type 2 Diabetes Management Algorithm - 2019 Executive Summary. *Endocrine Practice* 2019;25(1):69-100. doi: 10.4158/CS-2018-0535
24. Young-Hyman D, de Groot M, Hill-Briggs F, et al. Psychosocial Care for People With Diabetes: A Position Statement of the American Diabetes Association. *Diabetes care* 2016;39(12):2126-40. doi: 10.2337/dc16-2053
25. RACGP. General practice management of type 2 diabetes: 2016–18. East Melbourne, Vic, 2016.
26. Dawson J, Doll H, Fitzpatrick R, et al. The routine use of patient reported outcome measures in healthcare settings. *BMJ (Clinical research ed)* 2010;340:c186. doi: 10.1136/bmj.c186 [published Online First: 2010/01/20]
27. Nano J, Carinci F, Okunade O, et al. A standard set of person-centred outcomes for diabetes mellitus: results of an international and unified approach. *Diabetic medicine : a journal of the British Diabetic Association* 2020 doi: <https://dx.doi.org/10.1111/dme.14286>

- 1
  - 2
  - 3
  - 4
  - 5
  - 6
  - 7
  - 8
  - 9
  - 10
  - 11
  - 12
  - 13
  - 14
  - 15
  - 16
  - 17
  - 18
  - 19
  - 20
  - 21
  - 22
  - 23
  - 24
  - 25
  - 26
  - 27
  - 28
  - 29
  - 30
  - 31
  - 32
  - 33
  - 34
  - 35
  - 36
  - 37
  - 38
  - 39
  - 40
  - 41
  - 42
  - 43
  - 44
  - 45
  - 46
  - 47
  - 48
  - 49
  - 50
  - 51
  - 52
  - 53
  - 54
  - 55
  - 56
  - 57
  - 58
  - 59
  - 60
28. Byrne JL, Davies MJ, Willaing I, et al. Deficiencies in postgraduate training for healthcare professionals who provide diabetes education and support: results from the Diabetes Attitudes, Wishes and Needs (DAWN2) study. 2017;34(8):1074-83. doi: 10.1111/dme.13334
29. Boyce MB, Browne JP, Greenhalgh J. The experiences of professionals with using information from patient-reported outcome measures to improve the quality of healthcare: a systematic review of qualitative research. 2014;23(6):508-18. doi: 10.1136/bmjqs-2013-002524 %J BMJ Quality & Safety
30. Foster A, Croot L, Brazier J, et al. The facilitators and barriers to implementing patient reported outcome measures in organisations delivering health related services: a systematic review of reviews. *J Patient Rep Outcomes* 2018;2:46. doi: 10.1186/s41687-018-0072-3 [published Online First: 2018/10/27]
31. Kendrick T, Stuart B, Leydon GM, et al. Patient-reported outcome measures for monitoring primary care patients with depression: PROMDEP feasibility randomised trial. *BMJ open* 2017;7(3):e015266-e66. doi: 10.1136/bmjopen-2016-015266
32. Hsiao C-J, Dymek C, Kim B, et al. Advancing the use of patient-reported outcomes in practice: understanding challenges, opportunities, and the potential of health information technology. *Quality of life research : an international journal of quality of life aspects of treatment, care and rehabilitation* 2019;28(6):1575-83. doi: <https://dx.doi.org/10.1007/s11136-019-02112-0>
33. McMorrow R, Hunter B, Hendrieckx C, et al. Effect of routinely assessing and addressing depression and diabetes distress using patient-reported outcome measures in improving outcomes among adults with type 2 diabetes: a systematic review protocol. 2021;11(3):e044888. doi: 10.1136/bmjopen-2020-044888 %J BMJ Open
34. Page MJ, McKenzie JE, Bossuyt PM, et al. The PRISMA 2020 statement: an updated guideline for reporting systematic reviews. 2021;372:n71. doi: 10.1136/bmj.n71 %J BMJ
35. Sterne JAC, Savović J, Page MJ, et al. RoB 2: a revised tool for assessing risk of bias in randomised trials. 2019;366:l4898. doi: 10.1136/bmj.l4898 %J BMJ
36. Naik AD, Hundt NE, Vaughan EM, et al. Effect of Telephone-Delivered Collaborative Goal Setting and Behavioral Activation vs Enhanced Usual Care for Depression Among Adults With Uncontrolled Diabetes: A Randomized Clinical Trial. *JAMA Network Open* 2019;2(8):e198634-e34. doi: 10.1001/jamanetworkopen.2019.8634
37. Ell K, Katon W, Xie B, et al. One-year postcollaborative depression care trial outcomes among predominantly Hispanic diabetes safety net patients. *Gen Hosp Psychiatry* 2011;33(5):436-42. doi: 10.1016/j.genhosppsych.2011.05.018 [published Online First: 2011/07/22]
38. Wu S, Ell K, Jin H, et al. Comparative Effectiveness of a Technology-Facilitated Depression Care Management Model in Safety-Net Primary Care Patients With Type 2 Diabetes: 6-Month Outcomes of a Large Clinical Trial. *J Med Internet Res* 2018;20(4):e147. doi: 10.2196/jmir.7692 [published Online First: 2018/04/25]
39. Cummings DM, Lutes LD, Littlewood K, et al. Randomized Trial of a Tailored Cognitive Behavioral Intervention in Type 2 Diabetes With Comorbid Depressive and/or Regimen-Related Distress Symptoms: 12-Month Outcomes From COMRADE. *Diabetes Care* 2019;42(5):841-48. doi: 10.2337/dc18-1841



- 1  
2  
3  
4  
5  
6  
7  
8  
9  
10  
11  
12  
13  
14  
15  
16  
17  
18  
19  
20  
21  
22  
23  
24  
25  
26  
27  
28  
29  
30  
31  
32  
33  
34  
35  
36  
37  
38  
39  
40  
41  
42  
43  
44  
45  
46  
47  
48  
49  
50  
51  
52  
53  
54  
55  
56  
57  
58  
59  
60
40. Johnson JA, Al Sayah F, Wozniak L, et al. Collaborative care versus screening and follow-up for patients with diabetes and depressive symptoms: results of a primary care-based comparative effectiveness trial. *Diabetes Care* 2014;37(12):3220-6.
  41. Rees G, O'Hare F, Saeed M, et al. Problem-solving therapy for adults with diabetic retinopathy and diabetes-specific distress: A pilot randomized controlled trial. *BMJ Open Diabetes Research and Care* 2017;5(1):e000307. doi: <http://dx.doi.org/10.1136/bmjdr-2016-000307>
  42. Dobler A, Herbeck Belnap B, Pollmann H, et al. Telephone-delivered lifestyle support with action planning and motivational interviewing techniques to improve rehabilitation outcomes. *Rehabilitation Psychology* 2018;63(2):170-81. doi: <http://dx.doi.org/10.1037/rep0000224>
  43. Sigurdardottir AK, Benediktsson R, Jonsdottir H. Instruments to tailor care of people with type 2 diabetes. *Journal of advanced nursing* 2009;65(10):2118-30. doi: 10.1111/j.1365-2648.2009.05040.x [published Online First: 2009/08/14]
  44. Kendrick T, El-Gohary M, Stuart B, et al. Routine use of patient reported outcome measures (PROMs) for improving treatment of common mental health disorders in adults. *The Cochrane database of systematic reviews* 2016;7(7):CD011119-CD19. doi: 10.1002/14651858.CD011119.pub2
  45. Chawla A, Saha C, Marrero DG. A novel application of the Problem Areas in Diabetes (PAID) instrument to improve glycemic control and patient satisfaction. *The Diabetes educator* 2010;36(2):337-44. doi: <https://dx.doi.org/10.1177/0145721709354607>
  46. Black N. Patient reported outcome measures could help transform healthcare. 2013;346:f167. doi: 10.1136/bmj.f167 %J BMJ : British Medical Journal
  47. Greenhalgh J, Gooding K, Gibbons E, et al. How do patient reported outcome measures (PROMs) support clinician-patient communication and patient care? A realist synthesis. *J Patient Rep Outcomes* 2018;2:42. doi: 10.1186/s41687-018-0061-6 [published Online First: 2018/10/09]
  48. Pouwer F, Snoek FJ, van der Ploeg HM, et al. Monitoring of psychological well-being in outpatients with diabetes: effects on mood, HbA(1c), and the patient's evaluation of the quality of diabetes care: a randomized controlled trial. *Diabetes care* 2001;24(11):1929-35. doi: 10.2337/diacare.24.11.1929 [published Online First: 2001/10/27]
  49. Ventura AD BJ, Holmes-Truscott E, Hendrieckx C, Pouwer F, Speight J. Diabetes MILES-2 2016 Survey Report. Diabetes Victoria, Melbourne, 2016.
  50. van der Feltz-Cornelis CM. Depression in diabetes mellitus: to screen or not to screen? A patient-centred approach. *The British Journal of Diabetes & Vascular Disease* 2011;11(6):276-81. doi: 10.1177/1474651411423539
  51. Leydon GM, Dowrick CF, McBride AS, et al. Questionnaire severity measures for depression: a threat to the doctor-patient relationship? *The British journal of general practice : the journal of the Royal College of General Practitioners* 2011;61(583):117-23. doi: 10.3399/bjgp11X556236 [published Online First: 2011/02/01]
  52. Hans PK, Gray CS, Gill A, et al. The provider perspective: investigating the effect of the Electronic Patient-Reported Outcome (ePRO) mobile application and portal on primary care provider workflow. *Primary health care research & development* 2018;19(2):151-64. doi: <https://dx.doi.org/10.1017/S1463423617000573>

- 1  
2  
3 53. Barr PJ, Berry SA, Gozansky WS, et al. No date for the PROM: the association between  
4 patient-reported health events and clinical coding in primary care. *Journal of patient-*  
5 *reported outcomes* 2020;4(1):17-17. doi: 10.1186/s41687-020-0183-5  
6  
7 54. Turner GM, Litchfield I, Finnikin S, et al. General practitioners' views on use of patient  
8 reported outcome measures in primary care: a cross-sectional survey and qualitative  
9 study. *BMC family practice* 2020;21(1):14. doi: [https://dx.doi.org/10.1186/s12875-019-](https://dx.doi.org/10.1186/s12875-019-1077-6)  
10 [1077-6](https://dx.doi.org/10.1186/s12875-019-1077-6)  
11  
12 55. Fenwick EK, Rees G, Holmes-Truscott E, et al. What is the best measure for assessing  
13 diabetes distress? A comparison of the Problem Areas in Diabetes and Diabetes Distress  
14 Scale: results from Diabetes MILES–Australia. *Journal of Health Psychology*  
15 2016;23(5):667-80. doi: 10.1177/1359105316642006  
16  
17 56. Halliday JA, Hendrieckx C, Busija L, et al. Validation of the WHO-5 as a first-step screening  
18 instrument for depression in adults with diabetes: Results from Diabetes MILES -  
19 Australia. *Diabetes research and clinical practice* 2017;132:27-35. doi:  
20 10.1016/j.diabres.2017.07.005 [published Online First: 2017/08/08]  
21  
22  
23  
24  
25  
26  
27  
28  
29  
30  
31  
32  
33  
34  
35  
36  
37  
38  
39  
40  
41  
42  
43  
44  
45  
46  
47  
48  
49  
50  
51  
52  
53  
54  
55  
56  
57  
58  
59  
60



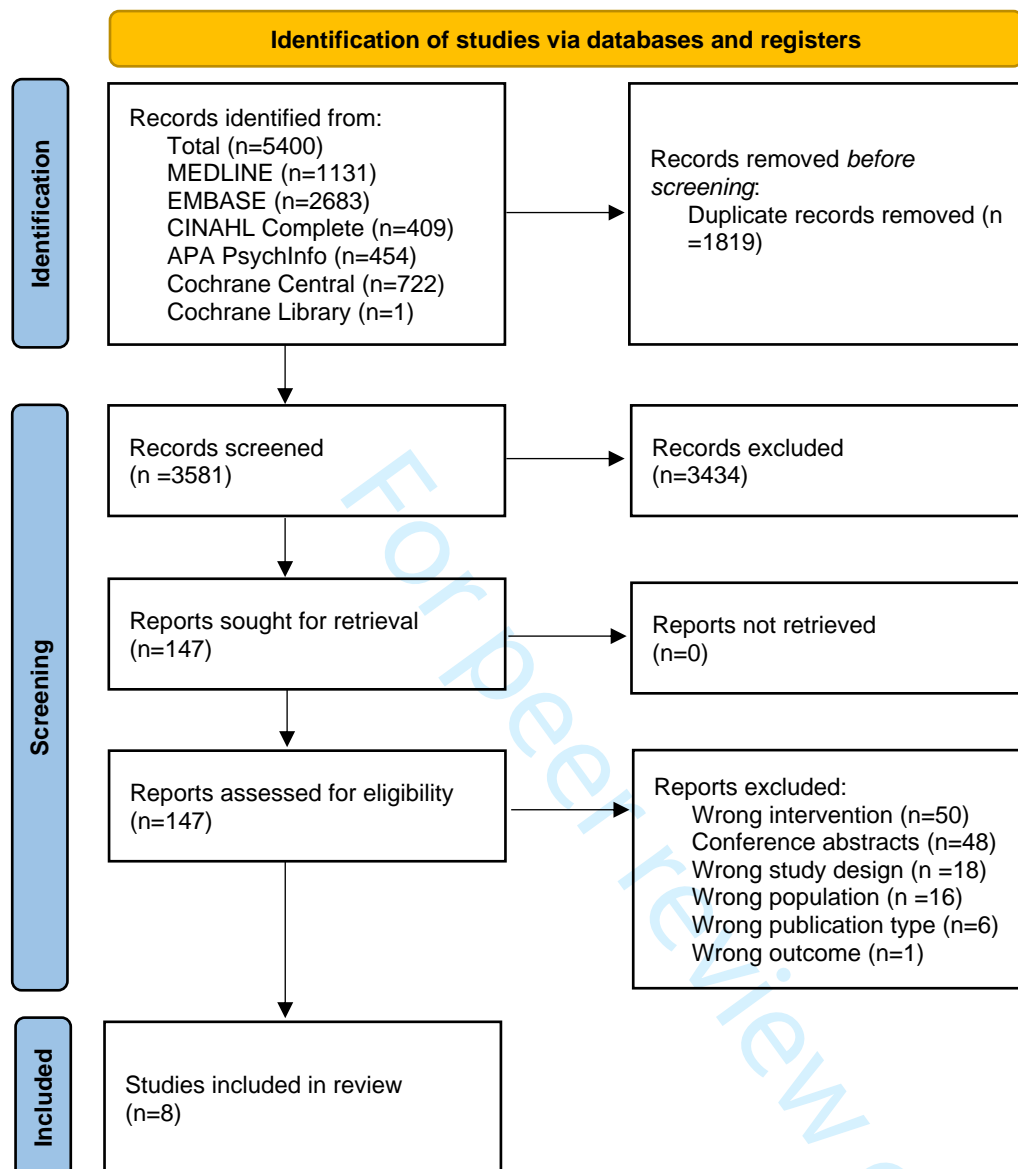

1  
2  
3 **Supplementary Document 1.**  
4

5 Full Search Strategy – MEDLINE (OVID)  
6

7  
8  
9  
10  
11  
12  
13  
14  
15  
16  
17  
18  
19  
20  
21  
22  
23  
24  
25  
26  
27  
28  
29  
30  
31  
32  
33  
34  
35  
36  
37  
38  
39  
40  
41  
42  
43  
44  
45  
46  
47  
48  
49  
50  
51  
52  
53  
54  
55  
56  
57  
58  
59  
60

| #   | Searches                                                                                                                |
|-----|-------------------------------------------------------------------------------------------------------------------------|
| 1.  | PROMS                                                                                                                   |
| 2.  | PROs                                                                                                                    |
| 3.  | patient-reported outcome*                                                                                               |
| 4.  | patient outcome*                                                                                                        |
| 5.  | (patient* adj1 (self-assess* or self-report* or self-monitor*))                                                         |
| 6.  | (assess adj4 (distress* or emotion* or psycholog* or psychosocial or wellbeing or well-being or depress* or mental*))   |
| 7.  | (monitor* adj4 (distress* or emotion* or psycholog* or psychosocial or wellbeing or well-being or depress* or mental*)) |
| 8.  | Problem Areas in Diabetes                                                                                               |
| 9.  | diabetes distress scale                                                                                                 |
| 10. | WHO-5                                                                                                                   |
| 11. | K10                                                                                                                     |
| 12. | PHQ                                                                                                                     |
| 13. | 1 or 2 or 3 or 4 or 5 or 6 or 7 or 8 or 9 or 10 or 11 or 12                                                             |
| 14. | Diabetes Mellitus, Type 2/ or Type 2 Diabetes.mp. or Type II Diabetes.mp. or T2DM.mp. or Diabetes Mellitus              |
| 15. | T2D                                                                                                                     |
| 16. | NIDDM                                                                                                                   |
| 17. | noninsulin dependent diabetes                                                                                           |
| 18. | 14 or 15 or 16 or 17                                                                                                    |
| 19. | wellbeing                                                                                                               |
| 20. | well-being                                                                                                              |
| 21. | psycholog*                                                                                                              |
| 22. | psychosocial*                                                                                                           |
| 23. | mental*                                                                                                                 |
| 24. | anxiety                                                                                                                 |
| 25. | depress*                                                                                                                |
| 26. | distress                                                                                                                |
| 27. | mood                                                                                                                    |
| 28. | emotion                                                                                                                 |

1  
2  
3  
4  
5  
6  
7  
8  
9  
10  
11  
12  
13  
14  
15  
16  
17  
18  
19  
20  
21  
22  
23  
24  
25  
26  
27  
28  
29  
30  
31  
32  
33  
34  
35  
36  
37  
38  
39  
40  
41  
42  
43  
44  
45  
46  
47  
48  
49  
50  
51  
52  
53  
54  
55  
56  
57  
58  
59  
60

|     |                                                          |
|-----|----------------------------------------------------------|
| 29. | 19 or 20 or 21 or 22 or 23 or 24 or 25 or 26 or 27 or 28 |
| 30. | 13 and 18 and 29                                         |
| 31. | limit 30 to (English language and humans)                |

For peer review only

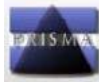

## PRISMA 2020 Checklist

1  
2  
3  
4  
5  
6  
7  
8  
9  
10  
11  
12  
13  
14  
15  
16  
17  
18  
19  
20  
21  
22  
23  
24  
25  
26  
27  
28  
29  
30  
31  
32  
33  
34  
35  
36  
37  
38  
39  
40  
41  
42  
43  
44  
45  
46  
47

| Section and Topic             | Item # | Checklist item                                                                                                                                                                                                                                                                                       | Location where item is reported |
|-------------------------------|--------|------------------------------------------------------------------------------------------------------------------------------------------------------------------------------------------------------------------------------------------------------------------------------------------------------|---------------------------------|
| <b>TITLE</b>                  |        |                                                                                                                                                                                                                                                                                                      |                                 |
| Title                         | 1      | Identify the report as a systematic review.                                                                                                                                                                                                                                                          | 1                               |
| <b>ABSTRACT</b>               |        |                                                                                                                                                                                                                                                                                                      |                                 |
| Abstract                      | 2      | See the PRISMA 2020 for Abstracts checklist.                                                                                                                                                                                                                                                         | 1                               |
| <b>INTRODUCTION</b>           |        |                                                                                                                                                                                                                                                                                                      |                                 |
| Rationale                     | 3      | Describe the rationale for the review in the context of existing knowledge.                                                                                                                                                                                                                          | 5                               |
| Objectives                    | 4      | Provide an explicit statement of the objective(s) or question(s) the review addresses.                                                                                                                                                                                                               | 5                               |
| <b>METHODS</b>                |        |                                                                                                                                                                                                                                                                                                      |                                 |
| Eligibility criteria          | 5      | Specify the inclusion and exclusion criteria for the review and how studies were grouped for the syntheses.                                                                                                                                                                                          | 5                               |
| Information sources           | 6      | Specify all databases, registers, websites, organisations, reference lists and other sources searched or consulted to identify studies. Specify the date when each source was last searched or consulted.                                                                                            | 6                               |
| Search strategy               | 7      | Present the full search strategies for all databases, registers and websites, including any filters and limits used.                                                                                                                                                                                 | Supplementary Document 1        |
| Selection process             | 8      | Specify the methods used to decide whether a study met the inclusion criteria of the review, including how many reviewers screened each record and each report retrieved, whether they worked independently, and if applicable, details of automation tools used in the process.                     | 6                               |
| Data collection process       | 9      | Specify the methods used to collect data from reports, including how many reviewers collected data from each report, whether they worked independently, any processes for obtaining or confirming data from study investigators, and if applicable, details of automation tools used in the process. | 6                               |
| Data items                    | 10a    | List and define all outcomes for which data were sought. Specify whether all results that were compatible with each outcome domain in each study were sought (e.g. for all measures, time points, analyses), and if not, the methods used to decide which results to collect.                        | 6                               |
|                               | 10b    | List and define all other variables for which data were sought (e.g. participant and intervention characteristics, funding sources). Describe any assumptions made about any missing or unclear information.                                                                                         | 6                               |
| Study risk of bias assessment | 11     | Specify the methods used to assess risk of bias in the included studies, including details of the tool(s) used, how many reviewers assessed each study and whether they worked independently, and if applicable, details of automation tools used in the process.                                    | 7                               |
| Effect measures               | 12     | Specify for each outcome the effect measure(s) (e.g. risk ratio, mean difference) used in the synthesis or presentation of results.                                                                                                                                                                  | N/A                             |
| Synthesis methods             | 13a    | Describe the processes used to decide which studies were eligible for each synthesis (e.g. tabulating the study intervention characteristics and comparing against the planned groups for each synthesis (item #5)).                                                                                 | N/A                             |
|                               | 13b    | Describe any methods required to prepare the data for presentation or synthesis, such as handling of missing summary statistics, or data conversions.                                                                                                                                                | N/A                             |
|                               | 13c    | Describe any methods used to tabulate or visually display results of individual studies and syntheses.                                                                                                                                                                                               | N/A                             |
|                               | 13d    | Describe any methods used to synthesize results and provide a rationale for the choice(s). If meta-analysis was performed, describe the model(s), method(s) to identify the presence and extent of statistical heterogeneity, and software package(s) used.                                          | N/A                             |
|                               | 13e    | Describe any methods used to explore possible causes of heterogeneity among study results (e.g. subgroup analysis, meta-regression).                                                                                                                                                                 | N/A                             |
|                               | 13f    | Describe any sensitivity analyses conducted to assess robustness of the synthesized results.                                                                                                                                                                                                         | N/A                             |
| Reporting bias assessment     | 14     | Describe any methods used to assess risk of bias due to missing results in a synthesis (arising from reporting biases).                                                                                                                                                                              | N/A                             |
| Certainty                     | 15     | Describe any methods used to assess certainty (or confidence) in the body of evidence for an outcome.                                                                                                                                                                                                | N/A                             |

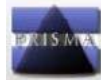

## PRISMA 2020 Checklist

| Section and Topic                              | Item # | Checklist item                                                                                                                                                                                                                                                                       | Location where item is reported |
|------------------------------------------------|--------|--------------------------------------------------------------------------------------------------------------------------------------------------------------------------------------------------------------------------------------------------------------------------------------|---------------------------------|
| assessment                                     |        |                                                                                                                                                                                                                                                                                      |                                 |
| <b>RESULTS</b>                                 |        |                                                                                                                                                                                                                                                                                      |                                 |
| Study selection                                | 16a    | Describe the results of the search and selection process, from the number of records identified in the search to the number of studies included in the review, ideally using a flow diagram.                                                                                         | 8                               |
|                                                | 16b    | Cite studies that might appear to meet the inclusion criteria, but which were excluded, and explain why they were excluded.                                                                                                                                                          | N/A                             |
| Study characteristics                          | 17     | Cite each included study and present its characteristics.                                                                                                                                                                                                                            | 10                              |
| Risk of bias in studies                        | 18     | Present assessments of risk of bias for each included study.                                                                                                                                                                                                                         | 17                              |
| Results of individual studies                  | 19     | For all outcomes, present, for each study: (a) summary statistics for each group (where appropriate) and (b) an effect estimate and its precision (e.g. confidence/credible interval), ideally using structured tables or plots.                                                     | Table 3                         |
| Results of syntheses                           | 20a    | For each synthesis, briefly summarise the characteristics and risk of bias among contributing studies.                                                                                                                                                                               | ?                               |
|                                                | 20b    | Present results of all statistical syntheses conducted. If meta-analysis was done, present for each the summary estimate and its precision (e.g. confidence/credible interval) and measures of statistical heterogeneity. If comparing groups, describe the direction of the effect. | N/A                             |
|                                                | 20c    | Present results of all investigations of possible causes of heterogeneity among study results.                                                                                                                                                                                       | N/A                             |
|                                                | 20d    | Present results of all sensitivity analyses conducted to assess the robustness of the synthesized results.                                                                                                                                                                           | N/A                             |
| Reporting biases                               | 21     | Present assessments of risk of bias due to missing results (arising from reporting biases) for each synthesis assessed.                                                                                                                                                              | Table 2                         |
| Certainty of evidence                          | 22     | Present assessments of certainty (or confidence) in the body of evidence for each outcome assessed.                                                                                                                                                                                  | N/A                             |
| <b>DISCUSSION</b>                              |        |                                                                                                                                                                                                                                                                                      |                                 |
| Discussion                                     | 23a    | Provide a general interpretation of the results in the context of other evidence.                                                                                                                                                                                                    | 24                              |
|                                                | 23b    | Discuss any limitations of the evidence included in the review.                                                                                                                                                                                                                      | 26                              |
|                                                | 23c    | Discuss any limitations of the review processes used.                                                                                                                                                                                                                                | 26                              |
|                                                | 23d    | Discuss implications of the results for practice, policy, and future research.                                                                                                                                                                                                       | 26                              |
| <b>OTHER INFORMATION</b>                       |        |                                                                                                                                                                                                                                                                                      |                                 |
| Registration and protocol                      | 24a    | Provide registration information for the review, including register name and registration number, or state that the review was not registered.                                                                                                                                       | 27                              |
|                                                | 24b    | Indicate where the review protocol can be accessed, or state that a protocol was not prepared.                                                                                                                                                                                       | 5                               |
|                                                | 24c    | Describe and explain any amendments to information provided at registration or in the protocol.                                                                                                                                                                                      | N/A                             |
| Support                                        | 25     | Describe sources of financial or non-financial support for the review, and the role of the funders or sponsors in the review.                                                                                                                                                        | 27                              |
| Competing interests                            | 26     | Declare any competing interests of review authors.                                                                                                                                                                                                                                   | 27                              |
| Availability of data, code and other materials | 27     | Report which of the following are publicly available and where they can be found: template data collection forms; data extracted from included studies; data used for all analyses; analytic code; any other materials used in the review.                                           | N/A                             |

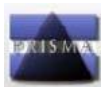

## PRISMA 2020 Checklist

- 1
- 2
- 3
- 4
- 5
- 6
- 7
- 8
- 9
- 10
- 11
- 12
- 13
- 14
- 15
- 16
- 17
- 18
- 19
- 20
- 21
- 22
- 23
- 24
- 25
- 26
- 27
- 28
- 29
- 30
- 31
- 32
- 33
- 34
- 35
- 36
- 37
- 38
- 39
- 40
- 41
- 42
- 43
- 44
- 45
- 46
- 47

10.1136/bmj.n71

For more information, visit: <http://www.prisma-statement.org/>

For peer review only

# BMJ Open

## Effect of routinely assessing and addressing depression and diabetes distress on clinical outcomes among adults with type 2 diabetes: A systematic review

|                                 |                                                                                                                                                                                                                                                                                                                                                                                                                                                                                                                                                                                                                                                                                                                                                                                                                                                                                                                                                                                                                                                                                                  |
|---------------------------------|--------------------------------------------------------------------------------------------------------------------------------------------------------------------------------------------------------------------------------------------------------------------------------------------------------------------------------------------------------------------------------------------------------------------------------------------------------------------------------------------------------------------------------------------------------------------------------------------------------------------------------------------------------------------------------------------------------------------------------------------------------------------------------------------------------------------------------------------------------------------------------------------------------------------------------------------------------------------------------------------------------------------------------------------------------------------------------------------------|
| Journal:                        | <i>BMJ Open</i>                                                                                                                                                                                                                                                                                                                                                                                                                                                                                                                                                                                                                                                                                                                                                                                                                                                                                                                                                                                                                                                                                  |
| Manuscript ID                   | bmjopen-2021-054650.R1                                                                                                                                                                                                                                                                                                                                                                                                                                                                                                                                                                                                                                                                                                                                                                                                                                                                                                                                                                                                                                                                           |
| Article Type:                   | Original research                                                                                                                                                                                                                                                                                                                                                                                                                                                                                                                                                                                                                                                                                                                                                                                                                                                                                                                                                                                                                                                                                |
| Date Submitted by the Author:   | 06-Apr-2022                                                                                                                                                                                                                                                                                                                                                                                                                                                                                                                                                                                                                                                                                                                                                                                                                                                                                                                                                                                                                                                                                      |
| Complete List of Authors:       | McMorrow, Rita; The University of Melbourne, Department of General Practice; The Baker Heart and Diabetes Institute, 75 Commercial Road, Melbourne, Australia<br>Hunter, Barbara; The University of Melbourne, Department of General Practice<br>Hendrieckx, Christel; The Australian Centre for Behavioural Research in Diabetes<br>Kwaśnicka, Dominika ; The University of Melbourne, NHMRC CRE in Digital Technology to Transform Chronic Disease Outcomes, The Baker Heart and Diabetes Institute, 75 Commercial Road, Melbourne, Australia; SWPS University of Social Sciences and Humanities, Faculty of Psychology<br>Speight, Jane; The Australian Centre for Behavioural Research in Diabetes,<br>Cussen, Leanne; Beaumont Hospital<br>Ho, Felicia Ching Siew ; The University of Melbourne, Melbourne Medical School<br>Emery, Jon; University of Melbourne, General Practice and Primary Care Academic Centre<br>Manski-Nankervis, Jo-Anne; University of Melbourne, Department of General Practice; The Baker Heart and Diabetes Institute, 75 Commercial Road, Melbourne, Australia |
| <b>Primary Subject Heading</b>: | Diabetes and endocrinology                                                                                                                                                                                                                                                                                                                                                                                                                                                                                                                                                                                                                                                                                                                                                                                                                                                                                                                                                                                                                                                                       |
| Secondary Subject Heading:      | Mental health                                                                                                                                                                                                                                                                                                                                                                                                                                                                                                                                                                                                                                                                                                                                                                                                                                                                                                                                                                                                                                                                                    |
| Keywords:                       | General diabetes < DIABETES & ENDOCRINOLOGY, Depression & mood disorders < PSYCHIATRY, Diabetes & endocrinology < INTERNAL MEDICINE                                                                                                                                                                                                                                                                                                                                                                                                                                                                                                                                                                                                                                                                                                                                                                                                                                                                                                                                                              |
|                                 |                                                                                                                                                                                                                                                                                                                                                                                                                                                                                                                                                                                                                                                                                                                                                                                                                                                                                                                                                                                                                                                                                                  |

SCHOLARONE™  
Manuscripts



I, the Submitting Author has the right to grant and does grant on behalf of all authors of the Work (as defined in the below author licence), an exclusive licence and/or a non-exclusive licence for contributions from authors who are: i) UK Crown employees; ii) where BMJ has agreed a CC-BY licence shall apply, and/or iii) in accordance with the terms applicable for US Federal Government officers or employees acting as part of their official duties; on a worldwide, perpetual, irrevocable, royalty-free basis to BMJ Publishing Group Ltd ("BMJ") its licensees and where the relevant Journal is co-owned by BMJ to the co-owners of the Journal, to publish the Work in this journal and any other BMJ products and to exploit all rights, as set out in our [licence](#).

The Submitting Author accepts and understands that any supply made under these terms is made by BMJ to the Submitting Author unless you are acting as an employee on behalf of your employer or a postgraduate student of an affiliated institution which is paying any applicable article publishing charge ("APC") for Open Access articles. Where the Submitting Author wishes to make the Work available on an Open Access basis (and intends to pay the relevant APC), the terms of reuse of such Open Access shall be governed by a Creative Commons licence – details of these licences and which [Creative Commons](#) licence will apply to this Work are set out in our licence referred to above.

Other than as permitted in any relevant BMJ Author's Self Archiving Policies, I confirm this Work has not been accepted for publication elsewhere, is not being considered for publication elsewhere and does not duplicate material already published. I confirm all authors consent to publication of this Work and authorise the granting of this licence.



**Title:** Effect of routinely assessing and addressing depression and diabetes distress on clinical outcomes among adults with type 2 diabetes: A systematic review

### Authors

Rita McMorrow<sup>1,4</sup> Barbara Hunter<sup>1</sup> Christel Hendrieckx<sup>2,3</sup> Dominika Kwasnicka<sup>4,5</sup> Jane Speight<sup>2,3</sup> Leanne Cussen<sup>6</sup> Felicia Ching Siew Ho<sup>7</sup> Jon Emery<sup>8</sup> Jo-Anne Manski-Nankervis<sup>1,4</sup>

### Affiliations

1. Department of General Practice, University of Melbourne, Melbourne, Australia
2. School of Psychology, Deakin University, Geelong, Australia
3. The Australian Centre for Behavioural Research in Diabetes, Diabetes Victoria, Melbourne, Australia
4. NHMRC CRE in Digital Technology to Transform Chronic Disease Outcomes, The Baker Heart and Diabetes Institute, 75 Commercial Road, Melbourne, Australia
5. Faculty of Psychology, SWPS University of Social Sciences and Humanities, Wroclaw, Poland
6. Department of Endocrinology, Beaumont Hospital, Dublin, Ireland
7. Melbourne Medical School, University of Melbourne, Melbourne, Australia
8. Department of General Practice and Centre for Cancer Research, University of Melbourne, Melbourne, Australia

### Corresponding Author

Dr Rita McMorrow, Department of General Practice, Level 3, 780 Elizabeth St., University of Melbourne, Victoria 3010, Australia

**Email** [rita.mcmorrow@unimelb.edu.au](mailto:rita.mcmorrow@unimelb.edu.au)

## Abstract

**Objectives:** This study examined the effect of using Patient-Reported Outcome Measures (PROMs) routinely to assess and address depressive symptoms and diabetes distress among adults with type 2 diabetes.

**Design:** A systematic review of published peer-reviewed studies.

**Data Sources:** Medline, Embase, CINAHL Complete, PsycInfo, The Cochrane Library, and Cochrane Central Register of Controlled Trials were searched.

**Eligibility criteria:** Studies including adults with type 2 diabetes, published in English, from the inception of the databases to 24 February 2022 inclusive; and where the intervention included completion of a PROM of depressive symptoms and/or diabetes distress, with feedback of the responses to a healthcare professional.

**Data extraction and synthesis:** Using Covidence software, screening and risk of bias assessment were conducted by two reviewers independently with any disagreements resolved by a third reviewer.

**Results:** The search identified 4,349 citations, of which 163 full-text citations were assessed for eligibility, and nine studies met the inclusion criteria. Five studies involved assessment of depressive symptoms only, two studies assessed diabetes distress only, and two studies assessed both. All studies had an associated co-intervention. When depressive symptoms were assessed (n=7), a statistically significant between-group difference in depressive symptoms was observed in five studies; with a clinically significant ( $\geq 0.5\%$ ) between-group difference in HbA1c in two studies. When diabetes distress was assessed (n=4), one study demonstrated statistically significant difference in depressive symptoms and diabetes distress; with a clinically significant between-group difference in HbA1c observed in two studies.

**Conclusion:** Studies are sparse in which PROMs are used to assess and address depressive symptoms or diabetes distress during routine clinical care of adults with type 2 diabetes. Further research is warranted to understand how to integrate PROMs into clinical care efficiently and determine appropriate interventions to manage identified problem areas.

**PROSPERO registration number:** CRD42020200246

## Article Summary

### Strengths and limitations of this study

- The review focuses on depressive symptoms and diabetes distress in people with type 2 diabetes, an important aspect of diabetes management.
- Systematic searching of six databases with independent review of abstracts and studies by two reviewers.
- Meta-analysis was not possible due to heterogeneity in method and frequency of PROM completion, communication of PROM responses to healthcare professionals, and differing associated co-interventions.

### Keywords

Diabetes Mellitus, Type 2, Depression, Patient Reported Outcome Measures

**Word Count:** 3451

## Introduction

Type 2 diabetes is a global health priority, with an estimated 463 million people with diabetes in 2017, set to rise to 700 million people in 2045.<sup>1</sup> Up to four in ten adults with type 2 diabetes experience emotional health problems, such as depression, anxiety, and diabetes distress.<sup>2 3</sup> While depression is a *general* negative affect; diabetes distress is the negative emotional or affective response specific to the day-to-day living with diabetes.<sup>3-5</sup> The relationship between diabetes distress and depressive symptoms is bi-directional: elevated diabetes distress is a predictor of future depression, and depression predicts future diabetes distress.<sup>6 7</sup> While early studies have linked depressive symptoms to sub-optimal glycaemia;<sup>8</sup> more recent research has demonstrated that diabetes distress affects glycaemia more than depressive symptoms.<sup>5 9</sup> Elevated depressive symptoms and diabetes distress are associated with reduced diabetes self-care and increased risk of diabetes-related complications, impaired quality of life, mortality, and an estimated 50% increase in healthcare costs.<sup>6 10-15</sup> Recent systematic reviews have focused on interventions for the management of diabetes distress; however, the first step is to identify people with depressive symptoms or diabetes distress requiring interventions in clinical practice.<sup>16-18</sup>

Guidelines have acknowledged the importance of assessing psychological well-being as part of diabetes care for over 25 years.<sup>19</sup> Given the growing evidence that diabetes-tailored psychological interventions reduce elevated distress and glycaemia, international diabetes guidelines have issued recommendations for routine assessment of depressive symptoms and diabetes distress.<sup>16 20-25</sup> Guidelines vary in terms of the specific patient-reported outcome measures (PROMs) recommended to assess depressive symptoms or diabetes distress. PROMs are standardised, validated questionnaires to assess latent constructs such as emotional well-being, treatment satisfaction, perceived health or functional status, or health-related quality of life.<sup>26</sup> Recent consensus from the International Consortium of Health Outcomes Measurement (ICHOM) recommends standardising the assessment of diabetes distress, depressive symptoms and general emotional well-being – with use of the Problem Areas In Diabetes (PAID) scale,

1  
2  
3 Patient Health Questionnaire – 9 (PHQ-9) and World Health Organisation – Five Well-Being Index  
4 (WHO-5), respectively – within clinical diabetes care.<sup>27</sup>  
5  
6  
7

8  
9 Despite these recommendations for using PROMs, 60% of healthcare professionals only discuss  
10 emotional issues if initiated by the person with diabetes.<sup>28</sup> Healthcare professionals need  
11 efficient systems to both assess and address depressive symptoms and diabetes distress as part  
12 of routine diabetes care.<sup>3</sup> For healthcare professionals to use PROMs, they need to understand  
13 the utility of PROMs in supporting people with type 2 diabetes clinically, not just for audit or  
14 research purposes,<sup>29 30</sup> and they need guidance in how to use and interpret PROM responses in  
15 clinical consultations.<sup>31 32</sup>  
16  
17  
18  
19  
20  
21  
22

23 Thus, the aim of this systematic review is to examine the effect of using PROMs routinely to assess  
24 and address depressive symptoms and/or diabetes distress among adults with type 2 diabetes  
25 on: (1) glycaemia as measured by HbA1c; (2) self-reported depressive symptoms or diabetes  
26 distress; (3) self-reported general emotional well-being or health-related quality of life; (4) self-  
27 reported diabetes self-management; (5) referrals for psychiatric or psychological therapy; (6)  
28 self-reported quality of patient-professional communication; and (7) self-reported satisfaction  
29 with the consultation.  
30  
31  
32  
33  
34  
35  
36  
37

## 38 **Methods**

39  
40 The protocol for this systematic review has been published,<sup>33</sup> and the methods are summarised  
41 below. We followed the Preferred Reporting Items for Systematic Reviews and Meta-Analyses  
42 (PRISMA) guidelines.<sup>34</sup> This systematic review is registered on the International Prospective  
43 Register of Systematic Reviews (PROSPERO: CRD42020200246).  
44  
45  
46  
47  
48

### 49 **Eligibility criteria**

50  
51 *Inclusion criteria:* Studies were eligible if: the design was a randomised controlled trial (RCT),  
52 interrupted time-series study, (prospective or retrospective) cohort study, case-control study, or  
53 analytical cross-sectional study; participants were adults (18 years or older) with type 2 diabetes  
54  
55  
56  
57  
58  
59

1  
2  
3 from any country; interventions involved a) participants completing a PROM for depressive  
4 symptoms and/or diabetes distress *and* b) use of PROM responses by the healthcare professional  
5 in consultation with the person with type 2 diabetes.  
6  
7  
8  
9

10 *Exclusion criteria:* Studies were excluded if they involved: people under 18 years of age, type 1  
11 diabetes or gestational diabetes; or the collection of PROM data but no use of the data in the  
12 clinical consultation.  
13  
14  
15

### 16 **Data sources and searches**

17  
18 A systematic search strategy was used to identify studies. The initial search was on 3 August 2020  
19 and repeated on 24 February 2022 using the same search terms (Supplementary File 1.) The  
20 search was limited to papers published in English and before 24 February 2022. The search  
21 strategy was developed in consultation with a librarian from a biomedical library (complete  
22 search strategy: Supplementary Document 1). Databases searched included MEDLINE (Ovid),  
23 EMBASE (Ovid), CINAHL Complete (EBSCO), APA PsycInfo (Ovid), The Cochrane Library (Ovid), and  
24 Cochrane Central Register of Controlled Trials (Ovid).  
25  
26  
27  
28  
29  
30  
31  
32  
33

### 34 **Study selection and data extraction**

35  
36 Following the initial search on 3<sup>rd</sup> August 2020, two reviewers (RM and a second member of the  
37 review team (JMN, BH, LC, DK or FCSH)) screened studies independently based on the inclusion  
38 criteria using Covidence software. Both reviewers screened the title and abstract of all eligible  
39 studies, followed by full-text screening of the shortlisted studies. Any disagreements about  
40 selection, assessment, and data extraction in the included studies were discussed between the  
41 two reviewers, and if required, a third reviewer was involved in the discussion. Following the  
42 updated search on 24<sup>th</sup> February 2022, RM screened additional identified title and abstract  
43 independently, with full-text screening of the shortlisted studies by RM. Reference lists were not  
44 checked for studies. Data extraction was undertaken by RM with 20% checked by LC or DK. The  
45 extracted data were: study settings, participants, description of the interventions, comparators,  
46 study duration, length of follow-up, and outcome measures. The authors of the selected studies  
47  
48  
49  
50  
51  
52  
53  
54  
55  
56  
57  
58  
59  
60

1  
2  
3 were contacted for additional data (when published details were insufficient), with one month  
4 allowed for response.  
5  
6  
7

### 8 **Quality assessment**

9  
10 Eligible studies were assessed for risk of bias by two reviewers (RM and a second member of the  
11 review team (JMN, BH or DK)) independently using the Cochrane Risk of Bias 2 tool or ROBINS-  
12 I.<sup>35 36</sup> Any disagreements were discussed between the two reviewers, and if required, a third  
13 reviewer was involved in the discussion.  
14  
15  
16  
17

### 18 **Data synthesis**

19  
20 Due to heterogeneity regarding method and frequency of PROM completion, communication of  
21 PROM responses to healthcare professionals and differing associated co-interventions (actions  
22 based on PROM responses) it was not possible to conduct a meta-analysis. Therefore, the results  
23 are summarised narratively.  
24  
25  
26  
27  
28  
29

### 30 **Patient and Public Involvement**

31 Patients or public were not involved in the conduct of this systematic review.  
32  
33  
34  
35

### 36 **Ethics approval**

37 This is a systematic review, ethical approval was not required.  
38  
39

## 40 **Results**

41 The systematic search identified 4,512 citations, of which 163 full-text citations were assessed  
42 for eligibility, and nine studies met the inclusion criteria (Figure 1).  
43  
44  
45

46  
47 *Insert Figure 1 here*  
48  
49

50  
51 Figure 1 PRISMA Flow Diagram<sup>34</sup>  
52  
53  
54  
55  
56  
57  
58  
59  
60

### Characteristics of included studies

The nine included studies were published between 2009 and 2020 (Table 1). The overall number of participants across all nine studies was N=3325, ranging from N=40 to N=1,306 per study. Six of the nine studies were conducted in the USA,<sup>37-42</sup> with the remainder conducted in Australia,<sup>43</sup> Germany,<sup>44</sup> and Iceland.<sup>45</sup> Most study designs were RCTs (n=6),<sup>37 38 40 43-45</sup> one of which was a pilot study (n=1).<sup>43</sup> The remaining three studies included case control study (n=2)<sup>41 42</sup> and an observational study (n=1).<sup>39</sup> Clinical settings varied across studies, including: general practice (n=4);<sup>38 40 41 42</sup> both primary care and hospital clinics (n=2);<sup>37 39</sup> specialist outpatient clinic (n=2);<sup>43</sup> and a specialist rehabilitation service (n=1).<sup>44</sup>

*Insert Table 1 here*



Table 1. Study characteristics

| Author (year)<br>Country                                    | Clinical setting                                                                                | Study design and n per arm                              | Intervention PROM     | Method and frequency of PROM completion                                             | Summary of actions based on PROM responses                                                                                                                                                                                                                                  | Control arm                                                                                                     |
|-------------------------------------------------------------|-------------------------------------------------------------------------------------------------|---------------------------------------------------------|-----------------------|-------------------------------------------------------------------------------------|-----------------------------------------------------------------------------------------------------------------------------------------------------------------------------------------------------------------------------------------------------------------------------|-----------------------------------------------------------------------------------------------------------------|
| <b>Cummings et al. (2019)</b> <sup>40</sup><br><b>USA</b>   | Adults with symptoms of distress and/or depression attending general practice                   | 12-month RCT: Intervention n=67/ usual care n=72        | PHQ-9*<br>DDS-17**    | In-person completion with trained study team member twice, six months apart         | Stratified treatment to 16 sessions of cognitive behavioural therapy or lifestyle coaching based on PROM responses                                                                                                                                                          | Educational materials and usual care with GP.                                                                   |
| <b>Dobler et al. (2018)</b> <sup>44</sup><br><b>Germany</b> | Adults attending specialist outpatient clinic, recruitment during inpatient rehabilitation stay | 12-month RCT: Intervention n=98 / Control n=101         | PAID**, WHO-5, PHQ-9* | Telephone completion with trained study team member, monthly                        | Behaviour motivation plan developed. Monthly follow-up telephone calls using PHQ-2 (with progression to PHQ9 if PHQ score $\geq 3$ ) to identify and address emotional problems. Severity of symptoms guided counseling techniques, increase in call frequency, or referral | Written information on diet, physical activity by mail at 3 and 9 months.                                       |
| <b>Fortmann et al. (2020)</b> <sup>42</sup><br><b>USA</b>   | Adults attending two primary care clinics                                                       | 12-month case control study: Intervention n=236 / n=239 | PHQ-2*, PHQ-9*        | In-person completion with the registered nurse or certified diabetes educator, once | Positive screening on PROM resulted in referral to depression care manager with group-based cognitive behavioral therapy. Depression screening was part of a collaborative care model focused on cardiometabolic targets                                                    | Standard diabetes care without depression screening.                                                            |
| <b>Ell et al. (2011)</b> <sup>38</sup><br><b>USA</b>        | Adults with PHQ9 response $\geq 10$ ,                                                           | 24-month RCT: Intervention n=193/ Enhanced              | PHQ-9*                | Telephone completion with trained study                                             | Collaborative care model using structured stepped-care algorithm, with patient preferences for                                                                                                                                                                              | Standard care, depression educational pamphlets and social resource list. GPs informed of depression diagnosis. |

| Author (year)<br>Country                                    | Clinical setting                                                                                               | Study design and n per arm                                                      | Intervention PROM                 | Method and frequency of PROM completion                                              | Summary of actions based on PROM responses                                                                                                                                                                  | Control arm                                                          |
|-------------------------------------------------------------|----------------------------------------------------------------------------------------------------------------|---------------------------------------------------------------------------------|-----------------------------------|--------------------------------------------------------------------------------------|-------------------------------------------------------------------------------------------------------------------------------------------------------------------------------------------------------------|----------------------------------------------------------------------|
|                                                             | attending primary care safety net clinics                                                                      | usual care n=194                                                                |                                   | team member once                                                                     | problem-solving therapy or anti-depressants guiding treatment                                                                                                                                               |                                                                      |
| <b>Johnson et al. (2014)</b> <sup>41</sup><br><b>USA</b>    | Adults with PHQ >10, attending general practice                                                                | 12-month case control: Intervention n=95 / Active control n=62/ usual care n=71 | PHQ-9*                            | Telephone completion with trained study team member at least monthly until PHQ-9 <10 | Case-managers delivered individualised care, in collaboration with psychiatrist and endocrinologist, with treatment recommendations to GP based on a treatment algorithm and PROM responses                 | GP notified by letter of elevated PHQ-9 responses.                   |
| <b>Naik et al. (2019)</b> <sup>37</sup><br><b>USA</b>       | Adults attending hospital and outpatient community Veterans Affairs clinics                                    | 12-month RCT: Intervention n=136 / Enhanced usual care (EUC) n=89               | PHQ-9*                            | Telephone completion with trained study team member once                             | Nine telephone coaching sessions with trained study members using workbooks guiding the discussion and tracking progress to set and assess goals related to wellness, diet, exercise medication management. | Participants informed of PHQ-9 responses with educational materials. |
| <b>Rees et al. (2017)</b> <sup>43</sup><br><b>Australia</b> | Adults with diabetes related retinopathy and moderate diabetes distress attending specialist outpatient clinic | 6-month pilot RCT: Intervention n=21 / control n=19                             | DDS**                             | In-person completion with trained study member once                                  | PROM responses guided eight 45–60-minute problem solving therapy sessions                                                                                                                                   | Pamphlets on diabetes-specific topics                                |
| <b>Sigurdardottir et al. (2009)</b> <sup>45</sup>           | Adults attending specialist                                                                                    | 6-month RCT: Intervention                                                       | PAID**<br>DKT, DES,<br>Summary of | In-person completion at clinic with                                                  | Diabetes educators delivered individual educational sessions based on empowerment theory. PROM                                                                                                              | Information booklet about T2D and attended usual diabetes clinics.   |

| Author (year)<br>Country              | Clinical setting                                                   | Study design and n per arm                                                                       | Intervention PROM          | Method and frequency of PROM completion                                                                              | Summary of actions based on PROM responses                                                                                                  | Control arm                                           |
|---------------------------------------|--------------------------------------------------------------------|--------------------------------------------------------------------------------------------------|----------------------------|----------------------------------------------------------------------------------------------------------------------|---------------------------------------------------------------------------------------------------------------------------------------------|-------------------------------------------------------|
| Iceland                               | outpatient clinic                                                  | n=28 / Control<br>n=25                                                                           | diabetes self-care measure | diabetes educator once                                                                                               | responses identified barriers to goals with a weekly follow-up call for five weeks                                                          |                                                       |
| Wu et al. (2018) <sup>39</sup><br>USA | Adults attending primary care or hospital-based safety net clinics | 6-month observational: Technology-facilitated care n=432/ supported care n=461/ usual care n=416 | PHQ-2, PHQ-9*              | Initially completed via telephone with trained study member. Then monthly – quarterly completion via automated calls | PROM responses linked to clinical decision support that generated action reminders for healthcare professionals depending on PROM responses | Standard primary care. GPs offered optional training. |

\*depression, \*\*diabetes distress

DDS: Diabetes Distress Scale; DES: Diabetes Empowerment Scale; DKT: Diabetes Knowledge Test; GP: general practitioner; PAID: Problem Area In Diabetes scale, PHQ: Patient Health Questionnaire (2 items or 9 items), WHO-5: The World Health Organisation Five-item Well-Being Index

### Risk of bias of included studies

Four of the nine studies were rated as having a low risk of bias (Supplementary File 2).<sup>38 40 41 43 45</sup>

Three studies were non-randomised studies of interventions, and at moderate risk of bias due to risk of baseline confounding.<sup>39 41 42</sup> Methodological concerns were observed in three studies.<sup>37</sup>

<sup>39 44</sup> Dobber *et al.* reported outcomes for 98 of the 123 participants randomised to the intervention group and did not state how missing outcomes were dealt with; intention to treat was not reported.<sup>44</sup> Naik *et al.* reported 12-month outcome data for only 90 of the 136 intervention participants; intention to treat was not reported.<sup>37</sup> In most studies, due to the study design, participants and clinical study team members delivering the intervention could not be blinded to participants' group allocation. Two studies were pilot studies with small sample sizes.<sup>43</sup>

<sup>45</sup> Despite being a pilot study, the Rees *et al.* had sufficient power to detect differences in glycaemia, but lower power for depressive symptoms or diabetes distress.<sup>43</sup> Sigurdardottir *et al.* did not include power calculations.<sup>45</sup>

## Intervention

### *Interventions to assess depressive symptoms and/or diabetes distress*

Five of the nine studies assessed depressive symptoms alone,<sup>37-39 41 42</sup> two assessed depressive symptoms and diabetes distress,<sup>40 44</sup> and two assessed diabetes distress alone.<sup>43 45</sup> All seven studies assessing depressive symptoms used the Patient Health Questionnaire (PHQ).<sup>37-42 44</sup> One study used the PHQ-2 for brief screening with responses of more than three proceeding to the PHQ-9.<sup>39</sup> Diabetes distress was assessed in two studies using the Diabetes Distress Scale (DDS),<sup>40 43</sup> and in two studies using the Problem Areas In Diabetes (PAID) scale.<sup>44 45</sup>

PROMs were completed either in-person (n=5),<sup>40-44</sup> or via telephone (n=4).<sup>37-39 45</sup> In six studies, PROM responses were collected by study team members not involved in ongoing clinical care,<sup>37 38 40 41 43 44</sup> either via telephone,<sup>37 38 41 44</sup> or at the clinic with a study team member.<sup>40 43</sup> One study collected PROM responses using automated calls.<sup>39</sup> In two study, PROM completion was at the clinic with the diabetes educator.<sup>42 45</sup>

Feedback of PROM responses provided to treating healthcare professionals varied. Three studies trained case managers in making treatment recommendations to primary care health professionals based on case collaboration and treatment algorithms.<sup>38 41 42</sup> In studies where trained study members collected PROM responses, the mechanism by which PROM data was provided to the treating healthcare professionals was not reported.<sup>43 44</sup> In the Naik *et al.* study, the general practitioner received a secure message notifying the HbA1c results and PHQ-9 response.<sup>37</sup> Wu *et al.* used PHQ-9 responses to generate action reminders integrated with the disease management registry for healthcare professionals to review.<sup>39</sup>

### *Co-intervention associated with PROM responses*

Each of the nine studies had a co-intervention associated with the PROM completion (see Table 1), which included telephone-assisted psychological therapy or coaching interventions,<sup>37 40 43-45</sup> or healthcare professional interventions of collaborative team care with case management and stepped care treatment algorithms.<sup>38 41 42</sup> Wu *et al.* linked PROM responses to a clinical decision

1  
2  
3  
4  
5  
6  
7  
8  
9  
10  
11  
12  
13  
14  
15  
16  
17  
18  
19  
20  
21  
22  
23  
24  
25  
26  
27  
28  
29  
30  
31  
32  
33  
34  
35  
36  
37  
38  
39  
40  
41  
42  
43  
44  
45  
46  
47  
48  
49  
50  
51  
52  
53  
54  
55  
56  
57  
58  
59  
60

support tool that generated action reminders for healthcare professionals based on PROM responses within a disease management register.<sup>39</sup>

*Insert Table 2 here*

For peer review only

Table 2 Follow-up study outcomes between intervention and control groups

| Author (year)<br>Country                             | Intervention<br>PROM | Length<br>of<br>follow<br>up | HbA1c                                                | Depressive<br>symptoms                                                              | Diabetes distress                                          | Other PROM<br>outcomes                                    | Self-management                              |
|------------------------------------------------------|----------------------|------------------------------|------------------------------------------------------|-------------------------------------------------------------------------------------|------------------------------------------------------------|-----------------------------------------------------------|----------------------------------------------|
| <b>Cummings et al. (2019)</b> <sup>40</sup><br>USA   | PHQ-9* DDS-17**      | 12 months                    | 8.9% (2.1) vs 9% (2.2)<br>p = 0.06                   | PHQ-9: 6.3 (5.9) vs. 7.9 (7)<br>p = 0.01                                            | DDS (RDD): 2.1 (1.2) vs 2.6 (1.3)<br>p = 0.0001            | Not assessed                                              | SDSCA: 4.3 (1.4) vs. 3.98 (1.3) p = 0.03     |
| <b>Dobler et al. (2018)</b> <sup>44</sup><br>Germany | PAID**, PHQ-9*       | 12 months                    | mean change -0.7% (1.4) vs. 0.1% (1.7)<br>p = 0.006  | PHQ-9: mean change -1.35 (4.3) vs. -0.23 (4.9)<br>p = 0.057                         | PAID: mean change - 4.77 (14.4) vs. -1.4 (17)<br>p = 0.069 | WHO-5: 1.23 (5.7) vs. 0.1 (5.8)<br>p = 0.044              | Not assessed                                 |
| <b>Ell et al. (2011)</b> <sup>38</sup><br>USA        | PHQ-9*               | 24 months                    | 9.1% (0.29) vs. 8.9% (0.29)<br>p = 0.42              | PHQ-9 (reported as >50% reduction): adjusted OR=1.87, 95%CI [1.05–3.32]<br>p = 0.03 | Not assessed                                               | SF-12 mental: 44.76 (1.150) vs. 42.48 (1.17)<br>p = 0.001 | SDSCA: 3.6 (0.15) vs. 3.41 (0.2)<br>p = 0.26 |
| <b>Fortmann et al. (2020)</b> <sup>42</sup><br>USA   | PHQ-2, PHQ-9*        | 12 months                    | mean change: -0.5% vs. 0.0% p = 0.011                | Only assessed in intervention arm                                                   | Only assessed in intervention arm                          | Not assessed                                              | Only assessed in intervention arm            |
| <b>Johnson et al. (2014)</b> <sup>41</sup><br>USA    | PHQ-9*               | 12 months                    | mean change: -0.2% (1.3) vs. -0.2% (1.1)<br>p = 0.47 | PHQ-9: 7.1 (5.4) vs. 9.4 (5.9)<br>p = <0.001                                        | PAID-5: mean change -0.6 (0.8) vs. 0.2 (0.9)<br>p = 0.03   | EQ-5D: mean change 0.03 (0.1) vs. 0.04 (0.12) p = 0.23    | Not assessed                                 |
| <b>Naik et al. (2019)</b> <sup>37</sup><br>USA       | PHQ-9*               | 12 months                    | 8.7% (1.6) vs 8.9% (2)<br>p = 0.83                   | PHQ-9: 10.1 (6.9) vs 12.6 (6.5)<br>p = 0.03                                         | Not assessed                                               | Not assessed                                              | Not assessed                                 |

| Author (year)<br>Country                                 | Intervention<br>PROM | Length<br>of<br>follow<br>up | HbA1c                                       | Depressive<br>symptoms                               | Diabetes distress                                    | Other PROM<br>outcomes                                                                                                                            | Self-management                                     |
|----------------------------------------------------------|----------------------|------------------------------|---------------------------------------------|------------------------------------------------------|------------------------------------------------------|---------------------------------------------------------------------------------------------------------------------------------------------------|-----------------------------------------------------|
| Rees et al.<br>(2017) <sup>43</sup><br>Australia         | DDS**                | 6<br>months                  | 7.1% (1.1) vs.<br>8.4% (2.5)<br>p = 0.093   | PHQ-9:<br>6.7 (5.9) vs. 9.9 (6.5)<br>p = 0.144       | DDS:<br>2.2 (1.1) vs. 2.5 (0.8)<br>p = 0.427         | Not assessed                                                                                                                                      | SDSCA diet:<br>6.1 (1.1) vs. 5 (1.5) p<br>= 0.026   |
| Sigurdardottir<br>et al. (2009) <sup>45</sup><br>Iceland | PAID**               | 6<br>months                  | 8.0% (1.16) vs.<br>7.8% (.081)<br>p = 0.399 | Not assessed                                         | PAID:<br>19.1 (12.9) vs. 13.8<br>(12.6)<br>p = 0.239 | WBQ-12:<br>28.4 (6.1) vs. 27.4<br>(5.6)<br>p = 0.544                                                                                              | SDSCA diet:<br>3.6 (0.4) vs. 3.4 (0.5)<br>p = 0.122 |
| Wu et al.<br>(2018) <sup>39</sup><br>USA                 | PHQ-2, PHQ-<br>9*    | 6<br>months                  | 8.1% (0.16) vs.<br>8.0% (0.17)<br>p = 0.57  | PHQ-9:<br>5.16 (0.48) vs. 6.35<br>(0.49)<br>p = 0.02 | Not assessed                                         | SF-12 mental:<br>49.87 (1.02) vs.<br>48.38 (1.04)<br>p = 0.17<br>Satisfaction with<br>diabetes care<br>4.20 (0.09) vs. 4.01<br>(0.09)<br>p = 0.05 | SDSCA: 4.78 (0.12)<br>vs. 4.66 (0.13)<br>p = 0.38   |

Outcome data are always presented as intervention vs control. Note, Johnson et al. was a case control study involving three groups, with data related to intervention and active control represented here. Wu et al. was an observational study involving three groups, with data related to intervention vs usual care represented here.

Other PROM outcomes included general emotional well-being, mental health and health status, as well as satisfaction with diabetes care

DDS: Diabetes Distress Scale; 5-level EQ-5D: EuroQoL Five Dimensions; PAID: Problem Area in Diabetes scale, PHQ: Patient Health Questionnaire, RDD:

Regimen-related Diabetes Distress (a subscale of the DDS); SDSCA: Summary of Diabetes Self-Care Activities, SF-12: 12-Item Short-Form Survey, WBQ: Well-being Questionnaire; WHO-5: The World Health Organisation Five-item Well-Being Index,



## Outcomes

Reported outcomes across studies are detailed in Table 2. Referrals to psychology or psychiatry services were not reported. In three studies, in the control arm, healthcare professionals were informed of the elevated depressive symptoms.<sup>37 38 41</sup> In no study were healthcare professionals informed about elevated diabetes distress of participants in the control group.

All nine studies reported glycaemia, measured by HbA1c, as an outcome measure. Where PROM assessed depressive symptoms (n=7), a clinically significant between-group difference in HbA1c was observed in two studies.<sup>42 44</sup> Where diabetes distress was assessed (n=4), a clinically significant between-group difference in HbA1c was observed in two studies.<sup>43 44</sup> Each of these studies had a co-intervention involving a series of psychological therapy sessions.<sup>43 44</sup> Only one of three studies using PROMs as part of stepped care algorithms with care coordination demonstrated a statistically significant glycaemic reduction.<sup>42</sup>

All but two studies examined the impact of PROMs use on depressive symptoms.<sup>42 45</sup> Across all seven studies, depressive symptoms (measured with the PHQ-9) reduced in both arms. Where the intervention included assessment of depressive symptoms (n=7), statistically significant difference in depressive symptoms between groups was observed in five studies.<sup>37-41</sup> Where diabetes distress was assessed during the intervention (n=4)<sup>40 43-45</sup>, three studies<sup>40 43 44</sup> reported depressive symptoms as an outcome measure, with a significant difference in depressive symptoms between groups observed in one study.<sup>40</sup> Five studies reported diabetes distress as an outcome measure.<sup>40 41 43-45</sup> Diabetes distress reduced in both the intervention and control arms across all five studies.<sup>40 41 43-45</sup> The difference between groups, favouring the intervention, was statistically significant in two studies.<sup>40 41</sup>

In the Cummings *et al.* study, when therapy was stratified based on elevated levels of depressive symptoms or diabetes distress, improved diabetes self-management was reported.<sup>40</sup> Similarly, in the Rees *et al.* study, when co-interventions focused on people with type 2 diabetes with elevated distress levels receiving individual psychological therapy, an improvement in diabetes

1  
2  
3 self-management was reported.<sup>43</sup> General emotional well-being, mental health and health status  
4 were reported using various measures, including the WHO-5, W-BQ, SF-12, and EQ-5D. No study  
5 reported patient-professional communication as an outcome. The Wu *et al.* study was the only  
6 one to assess satisfaction with diabetes care, and a statistically significant improvement in the  
7 intervention arm was observed.<sup>39</sup>  
8  
9  
10  
11  
12

## 13 14 Discussion

### 15 16 Main findings

17 To our knowledge, this is the first systematic review to synthesise the evidence related to PROM  
18 use to assess and address depressive symptoms and/or diabetes distress in type 2 diabetes care,  
19 despite diabetes guidelines recommending this practice for the past 25 years.<sup>20-25</sup> The key finding  
20 is that very few studies have examined the use of PROMs to assess and address depressive  
21 symptoms and/or diabetes distress during routine type 2 diabetes care. When depressive  
22 symptoms were assessed (n=7), a statistically significant between-group difference in HbA1c was  
23 observed in two studies.<sup>42 44</sup> A statistically significant between-group difference in depressive  
24 symptoms was observed in five of six studies where depressive symptoms were assessed during  
25 the intervention.<sup>37-41</sup> Where diabetes distress was assessed, a clinically significant between-  
26 group difference in HbA1c was observed in two of four studies,<sup>43 44</sup> and a statistically significant  
27 difference in both depressive symptoms and diabetes distress was observed in one study.<sup>40</sup> Two  
28 studies targeting people with elevated diabetes distress or depressive symptoms demonstrated  
29 statistically and clinically significant reductions in glycaemia.<sup>43 44</sup> This review found little evidence  
30 of the best-associated co-intervention for people identified by PROMs with elevated depressive  
31 symptoms or diabetes distress despite guideline recommendations.<sup>20-25</sup>  
32  
33  
34  
35  
36  
37  
38  
39  
40  
41  
42  
43  
44  
45  
46

47 Similar to this review's findings, a Cochrane review of PROM completion and feedback to  
48 healthcare professionals in the treatment of mental health conditions found insufficient evidence  
49 of impact on patient outcomes.<sup>46</sup> However, the interventions included in the Cochrane review  
50 were limited to PROM feedback to the healthcare professional, not linked to interventions.<sup>46</sup>  
51 While healthcare professionals frequently treat co-existing depression and type 2 diabetes,  
52  
53  
54  
55  
56  
57  
58  
59  
60

1  
2  
3 emotional issues such as diabetes distress are discussed less frequently.<sup>28</sup> While over 238 unique  
4 PROMs for people with type 2 diabetes have been identified, the most effective intervention to  
5 implement and then address PROM-identified elevated depressive symptoms or diabetes  
6 distress remains unclear.<sup>47</sup> Details about how precisely PROMs were used by healthcare  
7 professionals in discussion with people with type 2 diabetes were lacking. Further exploration of  
8 how PROMs can be integrated into routine clinical practice with the escalation of care for people  
9 with elevated depressive symptoms or distress is needed. Considering the recent  
10 recommendations from ICHOM for PROM use during diabetes care,<sup>27</sup> healthcare professionals  
11 need guidance on the appropriate evidence-based intervention for elevated depressive  
12 symptoms or diabetes distress identified using a PROM in clinical practice.<sup>29 30</sup>  
13  
14  
15  
16  
17  
18  
19  
20  
21  
22

23 Studies demonstrating improved glycaemia had co-interventions of targeting people with  
24 elevated distress levels or depressive symptoms.<sup>43 44</sup> Dobber *et al.* increased frequency of follow-  
25 up counselling if elevated depressive symptoms were identified using the PHQ-9.<sup>44</sup> Sturt's  
26 systematic review regarding the effectiveness of interventions to reduce diabetes distress  
27 showed that interventions delivered by a general healthcare professional demonstrate an  
28 improvement in glycaemia and reduce diabetes distress.<sup>17</sup> However, participants included in  
29 Sturt's review had low levels of diabetes distress, and a further systematic review in 2018  
30 identified that severe diabetes distress reduced with diabetes-specific psychological  
31 interventions.<sup>16</sup> Evidentially, targeted interventions are needed stratified on the basis of severity  
32 of distress.  
33  
34  
35  
36  
37  
38  
39  
40  
41  
42

43 Studies have reported that completing a measure of diabetes distress before a consultation can  
44 improve glycaemia and patient satisfaction among adults with type 1 and type 2 diabetes.<sup>48</sup>  
45 However, only Wu *et al.* explored changes in patient satisfaction with care – which is an  
46 important measure considering PROMs are reported as enablers of person-centred care.<sup>49</sup> No  
47 studies in our review explored the impact on patient-professional communication in the  
48 consultation, despite evidence suggesting PROM use in other clinical settings (oncology)  
49 improves communication, with PROMs initiating discussion of issues not otherwise addressed.<sup>50</sup>  
50  
51  
52  
53  
54  
55  
56  
57  
58  
59  
60

1  
2  
3  
4  
5 Studies have also indicated that completion of a diabetes distress measure before a consultation,  
6 and discussion of those responses during the consultation, improves glycaemia and reduces  
7 diabetes distress among adults with type 1 and type 2 diabetes in specialist diabetes clinics.<sup>7 48</sup>  
8  
9 Pouver *et al.*'s study of people with type 1 and type 2 diabetes found monitoring of well-being,  
10 using the Well-being Questionnaire (W-BQ), during diabetes care resulted in improved mood.<sup>51</sup>  
11  
12 While PROMs in these studies were embedded in routine care, they included people with type 1  
13 and type 2 diabetes (without separate sub-group analyses) and were not conducted in general  
14 practice, where most type 2 diabetes care occurs.<sup>52</sup> In our review, PROMs were completed most  
15 frequently with a trained study team member, not by a healthcare professional involved in the  
16 person's clinical care.<sup>37 38 40 41 43 44</sup> While this may replicate the likely real-world administration of  
17 PROMs (e.g. by a receptionist, upon arrival at the clinic), it is suggested that screening for  
18 depressive symptoms is best performed as part of collaborative care by the treating doctor or  
19 diabetes educator.<sup>53</sup> In the future, it would be useful to explore models based on depressive  
20 symptoms or diabetes distress identified by the usual healthcare professional with stratification  
21 of actions based on responses.  
22  
23  
24  
25  
26  
27  
28  
29  
30  
31  
32  
33

34 Healthcare professionals need PROMs that provide responses that provoke action. However, the  
35 effective interventions in this study were resource-intensive, which will be difficult to replicate  
36 and sustain in routine clinical practice. Only one study used electronic prompts to healthcare  
37 professionals based on PHQ responses.<sup>39</sup> Several studies have highlighted that clinical systems  
38 for PROM response delivery to healthcare professionals need to fit with clinical workflow.<sup>54-56</sup>  
39 Even with the electronic delivery of PROM responses, the large volume of responses for  
40 healthcare professionals to review and the difficulty accessing PROM responses (due to storage  
41 on a dashboard separate from the electronic medical record) contribute to low use of PROMs in  
42 clinical settings.<sup>55-57</sup>  
43  
44  
45  
46  
47  
48  
49  
50  
51  
52

### 53 **Strengths and limitations of the review**

54  
55  
56  
57  
58  
59  
60

1  
2  
3 Key strengths of this review include adherence to the PRISMA guidelines,<sup>34</sup> a comprehensive  
4 search strategy of six electronic databases, and screening performed independently by two  
5 reviewers. The risk of bias was low in most studies, indicating outcomes of this review are based  
6 on high-quality studies. Depression and diabetes distress were assessed using well-validated  
7 measures, including PHQ, PAID, and the DDS. The focus on type 2 diabetes is also a strength, as  
8 people with type 2 diabetes receive their care mostly in primary care settings, and their needs  
9 and preferences are different from people with type 1 diabetes.<sup>58 59</sup>  
10  
11  
12  
13  
14  
15  
16  
17

18 The heterogeneity of included co-interventions, how PROMs were completed, and healthcare  
19 professionals received the PROM responses, limits the overall review, making comparisons  
20 between studies difficult. It was not possible to conduct a meta-analysis because of the wide  
21 range of interventions and co-interventions assessed. Two studies had a small sample size with  
22 limited statistical power.<sup>43 45</sup> Other limitations include the restriction of our search to published  
23 journal articles in the English language. This may explain why all studies included were from high-  
24 income or upper-middle-income countries, with no studies from low-middle income countries  
25 identified. The inclusion criteria limited studies to populations with type 2 diabetes only, or  
26 where a sub-group analysis of participants with type 2 diabetes was included.  
27  
28  
29  
30  
31  
32  
33  
34  
35

### 36 **Future directions**

37  
38 Considering the low number of eligible studies, further research is warranted to understand the  
39 most efficient co-interventions to associate with PROM responses and how to integrate PROMs  
40 to coordinate interventions in general practice where most type 2 diabetes care occurs. The  
41 interventions examined as part of this review required significant external staff involvement,  
42 while only one study used technology to assist with PROM collection and delivery to healthcare  
43 professionals. Future research could focus on similar interventions using technology for self-  
44 completing PROMs with actionable outcomes if elevated depressive symptoms or diabetes  
45 distress are identified. Further research is needed to explore if PROM assessment of depressive  
46 symptoms and diabetes distress in routine type 2 diabetes care impacts communication and  
47 patient satisfaction with care.  
48  
49  
50  
51  
52  
53  
54  
55  
56  
57  
58  
59  
60

## Conclusions

This systematic review summarized and critiqued studies using PROMs for assessing and addressing depressive symptoms and/or diabetes distress as part of clinical type 2 diabetes care. The findings showed few studies using PROMs, but most are effective in reducing depressive symptoms or diabetes distress, though co-interventions related to PROM use in type 2 diabetes care are heterogeneous. While guidelines recommend the routine assessment of depressive symptoms and diabetes distress using PROMs, a clear mechanism for implementing this in routine diabetes care or the most effective co-intervention is yet to be established.

**PROSPERO registration number:** CRD42020200246

## Funding

Dr Rita McMorrow receives a PhD scholarship from Australian Rotary Health and the University of Melbourne (Grant number is not applicable). CH and JS are supported by core funding to the Australian Centre for Behavioural Research in Diabetes provided by the collaboration between Diabetes Victoria and Deakin University.

## Competing Interests

The authors have no competing interests to declare.

## Acknowledgements

The authors acknowledge the support of the University of Melbourne librarians Wil Villareal and Patrick Condon with preparing the search strategy.

## Author contributions

RM, JMN, BH, JE, JS, and CH conceived the study. RM, JMN, BH, DK, LC and FH performed the citation screening and risk of bias assessments. RM extracted the data with 20% also extracted

1  
2  
3 by LC. RM drafted the manuscript and revised it based on the feedback from co-authors. All  
4 authors approved the manuscript for submission.  
5  
6  
7

#### 8 **Data availability statement**

9 Data are available upon reasonable request to the corresponding author.  
10  
11  
12  
13  
14  
15  
16  
17  
18  
19  
20  
21  
22  
23  
24  
25  
26  
27  
28  
29  
30  
31  
32  
33  
34  
35  
36  
37  
38  
39  
40  
41  
42  
43  
44  
45  
46  
47  
48  
49  
50  
51  
52  
53  
54  
55  
56  
57  
58  
59  
60

For peer review only

## References

1. Saeedi P, Petersohn I, Salpea P, et al. Global and regional diabetes prevalence estimates for 2019 and projections for 2030 and 2045: Results from the International Diabetes Federation Diabetes Atlas, 9th edition. *Diabetes research and clinical practice* 2019;157:107843. doi: <https://doi.org/10.1016/j.diabres.2019.107843>
2. Peyrot M, Rubin RR, Lauritzen T, et al. Psychosocial problems and barriers to improved diabetes management: results of the Cross-National Diabetes Attitudes, Wishes and Needs (DAWN) Study. *Diabetic medicine : a journal of the British Diabetic Association* 2005;22(10):1379-85. doi: 10.1111/j.1464-5491.2005.01644.x [published Online First: 2005/09/24]
3. Skinner TC, Joensen L, Parkin T. Twenty-five years of diabetes distress research. *Diabetic medicine* 2020;37(3):393-400. doi: 10.1111/dme.14157
4. Snoek FJ, Bremmer MA, Hermanns N. Constructs of depression and distress in diabetes: time for an appraisal. *The lancet Diabetes & endocrinology* 2015;3(6):450-60. doi: 10.1016/s2213-8587(15)00135-7 [published Online First: 2015/05/23]
5. Fisher L, Mullan JT, Arean P, et al. Diabetes distress but not clinical depression or depressive symptoms is associated with glycemic control in both cross-sectional and longitudinal analyses. *Diabetes care* 2010;33(1):23-8. doi: 10.2337/dc09-1238 [published Online First: 2009/10/20]
6. Nanayakkara N, Pease A, Ranasinha S, et al. Depression and diabetes distress in adults with type 2 diabetes: results from the Australian National Diabetes Audit (ANDA) 2016. *Sci Rep* 2018;8(1):7846-46. doi: 10.1038/s41598-018-26138-5
7. Snoek FJ, Kersch NYA, Eldrup E, et al. Monitoring of Individual Needs in Diabetes (MIND)-2: follow-up data from the cross-national Diabetes Attitudes, Wishes, and Needs (DAWN) MIND study. *Diabetes care* 2012;35(11):2128-32. doi: <https://dx.doi.org/10.2337/dc11-1326>
8. Lustman PJ, Anderson RJ, Freedland KE, et al. Depression and poor glycemic control: a meta-analytic review of the literature. *Diabetes care* 2000;23(7):934-42. doi: 10.2337/diacare.23.7.934 %J Diabetes Care
9. Aikens JE. Prospective associations between emotional distress and poor outcomes in type 2 diabetes. *Diabetes care* 2012;35(12):2472-8. doi: <https://dx.doi.org/10.2337/dc12-0181>
10. Fisher L, Mullan JT, Skaff MM, et al. Predicting diabetes distress in patients with Type 2 diabetes: a longitudinal study. *Diabetic medicine : a journal of the British Diabetic Association* 2009;26(6):622-7. doi: 10.1111/j.1464-5491.2009.02730.x [published Online First: 2009/06/23]
11. Pintaudi B, Lucisano G, Gentile S, et al. Correlates of diabetes-related distress in type 2 diabetes: Findings from the benchmarking network for clinical and humanistic outcomes in diabetes (BENCH-D) study. *Journal of psychosomatic research* 2015;79(5):348-54. doi: <https://dx.doi.org/10.1016/j.jpsychores.2015.08.010>
12. Goldney RD, Phillips PJ, Fisher LJ, et al. Diabetes, depression, and quality of life: a population study. *Diabetes care* 2004;27(5):1066-70. doi: 10.2337/diacare.27.5.1066 [published Online First: 2004/04/28]



13. Hutter N, Schnurr A, Baumeister H. Healthcare costs in patients with diabetes mellitus and comorbid mental disorders—a systematic review. *Diabetologia* 2010;53(12):2470-79. doi: 10.1007/s00125-010-1873-y
14. Gilmer TP, O'Connor PJ, Rush WA, et al. Predictors of health care costs in adults with diabetes. *Diabetes care* 2005;28(1):59-64. doi: 10.2337/diacare.28.1.59 [published Online First: 2004/12/24]
15. Park M, Katon WJ, Wolf FM. Depression and risk of mortality in individuals with diabetes: a meta-analysis and systematic review. *General Hospital Psychiatry* 2013;35(3):217-25. doi: <https://doi.org/10.1016/j.genhosppsy.2013.01.006>
16. Schmidt CB, van Loon BJP, Vergouwen ACM, et al. Systematic review and meta-analysis of psychological interventions in people with diabetes and elevated diabetes-distress. *Diabetic medicine : a journal of the British Diabetic Association* 2018 doi: <https://dx.doi.org/10.1111/dme.13709>
17. Sturt J, Dennick K, Hessler D, et al. Effective interventions for reducing diabetes distress: systematic review and meta-analysis. *International Diabetes Nursing* 2015;12(2):40-55. doi: 10.1179/2057332415Y.0000000004
18. Chew BH, Vos RC, Metzendorf MI, et al. Psychological interventions for diabetes-related distress in adults with type 2 diabetes mellitus. *The Cochrane database of systematic reviews* 2017;9:Cd011469. doi: 10.1002/14651858.CD011469.pub2 [published Online First: 2017/09/28]
19. Speight J, Hendrieckx C, Pouwer F, et al. Back to the future: 25 years of 'Guidelines for encouraging psychological well-being' among people affected by diabetes. *Diabetic Medicine* 2019;n/a(n/a) doi: 10.1111/dme.14165
20. Bradley C, Gamsu DS, Diabetes PW-bWGotWISVDAPf. Guidelines for Encouraging Psychological Well-being. 1994;11(5):510-16. doi: 10.1111/j.1464-5491.1994.tb00316.x
21. Committee DCCPGE. Diabetes Canada 2018 Clinical Practice Guidelines for the Prevention and Management of Diabetes in Canada. *Can J Diabetes* 2018;42
22. Federation ID. Recommendations For Managing Type 2 Diabetes In Primary Care, 2017.
23. Garber AJ, Abrahamson MJ, Barzilay JI, et al. Consensus Statement by the American Association of Clinician Endocrinologists and American College of Endocrinology on the Comprehensive Type 2 Diabetes Management Algorithm - 2019 Executive Summary. *Endocrine Practice* 2019;25(1):69-100. doi: 10.4158/CS-2018-0535
24. Young-Hyman D, de Groot M, Hill-Briggs F, et al. Psychosocial Care for People With Diabetes: A Position Statement of the American Diabetes Association. *Diabetes care* 2016;39(12):2126-40. doi: 10.2337/dc16-2053
25. RACGP. General practice management of type 2 diabetes: 2016–18. East Melbourne, Vic, 2016.
26. Dawson J, Doll H, Fitzpatrick R, et al. The routine use of patient reported outcome measures in healthcare settings. *BMJ (Clinical research ed)* 2010;340:c186. doi: 10.1136/bmj.c186 [published Online First: 2010/01/20]
27. Nano J, Carinci F, Okunade O, et al. A standard set of person-centred outcomes for diabetes mellitus: results of an international and unified approach. *Diabetic medicine : a journal of the British Diabetic Association* 2020 doi: <https://dx.doi.org/10.1111/dme.14286>

- 1
  - 2
  - 3
  - 4
  - 5
  - 6
  - 7
  - 8
  - 9
  - 10
  - 11
  - 12
  - 13
  - 14
  - 15
  - 16
  - 17
  - 18
  - 19
  - 20
  - 21
  - 22
  - 23
  - 24
  - 25
  - 26
  - 27
  - 28
  - 29
  - 30
  - 31
  - 32
  - 33
  - 34
  - 35
  - 36
  - 37
  - 38
  - 39
  - 40
  - 41
  - 42
  - 43
  - 44
  - 45
  - 46
  - 47
  - 48
  - 49
  - 50
  - 51
  - 52
  - 53
  - 54
  - 55
  - 56
  - 57
  - 58
  - 59
  - 60
28. Byrne JL, Davies MJ, Willaing I, et al. Deficiencies in postgraduate training for healthcare professionals who provide diabetes education and support: results from the Diabetes Attitudes, Wishes and Needs (DAWN2) study. 2017;34(8):1074-83. doi: 10.1111/dme.13334
29. Boyce MB, Browne JP, Greenhalgh J. The experiences of professionals with using information from patient-reported outcome measures to improve the quality of healthcare: a systematic review of qualitative research. 2014;23(6):508-18. doi: 10.1136/bmjqs-2013-002524 %J BMJ Quality & Safety
30. Foster A, Croot L, Brazier J, et al. The facilitators and barriers to implementing patient reported outcome measures in organisations delivering health related services: a systematic review of reviews. *J Patient Rep Outcomes* 2018;2:46. doi: 10.1186/s41687-018-0072-3 [published Online First: 2018/10/27]
31. Kendrick T, Stuart B, Leydon GM, et al. Patient-reported outcome measures for monitoring primary care patients with depression: PROMDEP feasibility randomised trial. *BMJ open* 2017;7(3):e015266-e66. doi: 10.1136/bmjopen-2016-015266
32. Hsiao C-J, Dymek C, Kim B, et al. Advancing the use of patient-reported outcomes in practice: understanding challenges, opportunities, and the potential of health information technology. *Quality of life research : an international journal of quality of life aspects of treatment, care and rehabilitation* 2019;28(6):1575-83. doi: <https://dx.doi.org/10.1007/s11136-019-02112-0>
33. McMorrow R, Hunter B, Hendrieckx C, et al. Effect of routinely assessing and addressing depression and diabetes distress using patient-reported outcome measures in improving outcomes among adults with type 2 diabetes: a systematic review protocol. 2021;11(3):e044888. doi: 10.1136/bmjopen-2020-044888 %J BMJ Open
34. Page MJ, McKenzie JE, Bossuyt PM, et al. The PRISMA 2020 statement: an updated guideline for reporting systematic reviews. 2021;372:n71. doi: 10.1136/bmj.n71 %J BMJ
35. Sterne JAC, Savović J, Page MJ, et al. RoB 2: a revised tool for assessing risk of bias in randomised trials. 2019;366:l4898. doi: 10.1136/bmj.l4898 %J BMJ
36. Sterne JA, Hernán MA, Reeves BC, et al. ROBINS-I: a tool for assessing risk of bias in non-randomised studies of interventions. *BMJ (Clinical research ed)* 2016;355:i4919. doi: 10.1136/bmj.i4919
37. Naik AD, Hundt NE, Vaughan EM, et al. Effect of Telephone-Delivered Collaborative Goal Setting and Behavioral Activation vs Enhanced Usual Care for Depression Among Adults With Uncontrolled Diabetes: A Randomized Clinical Trial. *JAMA Network Open* 2019;2(8):e198634-e34. doi: 10.1001/jamanetworkopen.2019.8634
38. Ell K, Katon W, Xie B, et al. One-year postcollaborative depression care trial outcomes among predominantly Hispanic diabetes safety net patients. *Gen Hosp Psychiatry* 2011;33(5):436-42. doi: 10.1016/j.genhosppsy.2011.05.018 [published Online First: 2011/07/22]
39. Wu S, Ell K, Jin H, et al. Comparative Effectiveness of a Technology-Facilitated Depression Care Management Model in Safety-Net Primary Care Patients With Type 2 Diabetes: 6-Month Outcomes of a Large Clinical Trial. *J Med Internet Res* 2018;20(4):e147. doi: 10.2196/jmir.7692 [published Online First: 2018/04/25]

- 1
- 2
- 3
- 4 40. Cummings DM, Lutes LD, Littlewood K, et al. Randomized Trial of a Tailored Cognitive
- 5 Behavioral Intervention in Type 2 Diabetes With Comorbid Depressive and/or Regimen-
- 6 Related Distress Symptoms: 12-Month Outcomes From COMRADE. *Diabetes Care*
- 7 2019;42(5):841-48. doi: 10.2337/dc18-1841
- 8 41. Johnson JA, Al Sayah F, Wozniak L, et al. Collaborative care versus screening and follow-up
- 9 for patients with diabetes and depressive symptoms: results of a primary care-based
- 10 comparative effectiveness trial. *Diabetes Care* 2014;37(12):3220-6.
- 11 42. Fortmann AL, Walker C, Barger K, et al. Care Team Integration in Primary Care Improves
- 12 One-Year Clinical and Financial Outcomes in Diabetes: A Case for Value-Based Care.
- 13 *Popul Health Manag* 2020;23(6):467-75. doi: 10.1089/pop.2019.0103 [published Online
- 14 First: 2020/01/17]
- 15 43. Rees G, O'Hare F, Saeed M, et al. Problem-solving therapy for adults with diabetic
- 16 retinopathy and diabetes-specific distress: A pilot randomized controlled trial. *BMJ Open*
- 17 *Diabetes Research and Care* 2017;5(1):e000307. doi: [http://dx.doi.org/10.1136/bmjdr-](http://dx.doi.org/10.1136/bmjdr-2016-000307)
- 18 [2016-000307](http://dx.doi.org/10.1136/bmjdr-2016-000307)
- 19 44. Dobler A, Herbeck Belnap B, Pollmann H, et al. Telephone-delivered lifestyle support with
- 20 action planning and motivational interviewing techniques to improve rehabilitation
- 21 outcomes. *Rehabilitation Psychology* 2018;63(2):170-81. doi:
- 22 <http://dx.doi.org/10.1037/rep0000224>
- 23 45. Sigurdardottir AK, Benediktsson R, Jonsdottir H. Instruments to tailor care of people with
- 24 type 2 diabetes. *Journal of advanced nursing* 2009;65(10):2118-30. doi: 10.1111/j.1365-
- 25 2648.2009.05040.x [published Online First: 2009/08/14]
- 26 46. Kendrick T, El-Gohary M, Stuart B, et al. Routine use of patient reported outcome measures
- 27 (PROMs) for improving treatment of common mental health disorders in adults. *The*
- 28 *Cochrane database of systematic reviews* 2016;7(7):CD011119-CD19. doi:
- 29 10.1002/14651858.CD011119.pub2
- 30 47. Wee PJJ, Kwan YH, Loh DHF, et al. Measurement Properties of Patient-Reported Outcome
- 31 Measures for Diabetes: Systematic Review. *J Med Internet Res* 2021;23(8):e25002. doi:
- 32 10.2196/25002
- 33 48. Chawla A, Saha C, Marrero DG. A novel application of the Problem Areas in Diabetes (PAID)
- 34 instrument to improve glycemic control and patient satisfaction. *The Diabetes educator*
- 35 2010;36(2):337-44. doi: <https://dx.doi.org/10.1177/0145721709354607>
- 36 49. Black N. Patient reported outcome measures could help transform healthcare.
- 37 2013;346:f167. doi: 10.1136/bmj.f167 %J BMJ : British Medical Journal
- 38 50. Greenhalgh J, Gooding K, Gibbons E, et al. How do patient reported outcome measures
- 39 (PROMs) support clinician-patient communication and patient care? A realist synthesis. *J*
- 40 *Patient Rep Outcomes* 2018;2:42. doi: 10.1186/s41687-018-0061-6 [published Online
- 41 First: 2018/10/09]
- 42 51. Pouwer F, Snoek FJ, van der Ploeg HM, et al. Monitoring of psychological well-being in
- 43 outpatients with diabetes: effects on mood, HbA(1c), and the patient's evaluation of the
- 44 quality of diabetes care: a randomized controlled trial. *Diabetes care* 2001;24(11):1929-
- 45 35. doi: 10.2337/diacare.24.11.1929 [published Online First: 2001/10/27]
- 46 52. Ventura ADB, J.L.; Holmes-Truscott, E.; Hendriekx, C.; Pouwer, F.; Speight, J. Diabetes
- 47 MILES-2 2016 Survey Report. Diabetes Victoria, Melbourne, 2016.
- 48
- 49
- 50
- 51
- 52
- 53
- 54
- 55
- 56
- 57
- 58
- 59
- 60

- 1  
2  
3 53. van der Feltz-Cornelis CM. Depression in diabetes mellitus: to screen or not to screen? A  
4 patient-centred approach. *The British Journal of Diabetes & Vascular Disease*  
5 2011;11(6):276-81. doi: 10.1177/1474651411423539  
6
- 7 54. Leydon GM, Dowrick CF, McBride AS, et al. Questionnaire severity measures for depression:  
8 a threat to the doctor-patient relationship? *The British journal of general practice : the*  
9 *journal of the Royal College of General Practitioners* 2011;61(583):117-23. doi:  
10 10.3399/bjgp11X556236 [published Online First: 2011/02/01]  
11
- 12 55. Hans PK, Gray CS, Gill A, et al. The provider perspective: investigating the effect of the  
13 Electronic Patient-Reported Outcome (ePRO) mobile application and portal on primary  
14 care provider workflow. *Primary health care research & development* 2018;19(2):151-  
15 64. doi: <https://dx.doi.org/10.1017/S1463423617000573>  
16
- 17 56. Barr PJ, Berry SA, Gozansky WS, et al. No date for the PROM: the association between  
18 patient-reported health events and clinical coding in primary care. *Journal of patient-*  
19 *reported outcomes* 2020;4(1):17-17. doi: 10.1186/s41687-020-0183-5  
20
- 21 57. Turner GM, Litchfield I, Finnikin S, et al. General practitioners' views on use of patient  
22 reported outcome measures in primary care: a cross-sectional survey and qualitative  
23 study. *BMC family practice* 2020;21(1):14. doi: [https://dx.doi.org/10.1186/s12875-019-](https://dx.doi.org/10.1186/s12875-019-1077-6)  
24 [1077-6](https://dx.doi.org/10.1186/s12875-019-1077-6)  
25
- 26 58. Fenwick EK, Rees G, Holmes-Truscott E, et al. What is the best measure for assessing  
27 diabetes distress? A comparison of the Problem Areas in Diabetes and Diabetes Distress  
28 Scale: results from Diabetes MILES–Australia. *Journal of Health Psychology*  
29 2016;23(5):667-80. doi: 10.1177/1359105316642006  
30
- 31 59. Halliday JA, Hendrieckx C, Busija L, et al. Validation of the WHO-5 as a first-step screening  
32 instrument for depression in adults with diabetes: Results from Diabetes MILES -  
33 Australia. *Diabetes research and clinical practice* 2017;132:27-35. doi:  
34 10.1016/j.diabres.2017.07.005 [published Online First: 2017/08/08]  
35  
36  
37  
38  
39  
40  
41  
42  
43  
44  
45  
46  
47  
48  
49  
50  
51  
52  
53  
54  
55  
56  
57  
58  
59  
60

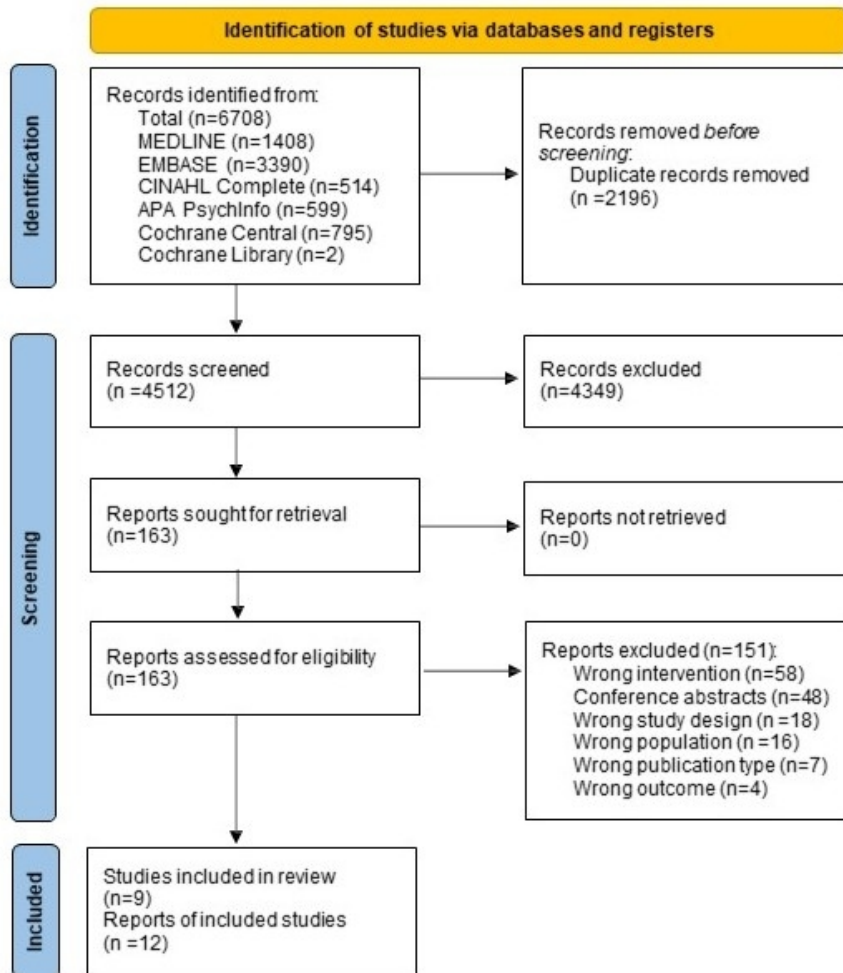

Figure 1. PRISMA Flow diagram

159x164mm (96 x 96 DPI)



## Supplementary File 1

## Full Search Strategy – Ovid MEDLINE

|     |                                                                                                                                                                                                                                                                                                                                                                                                                 |
|-----|-----------------------------------------------------------------------------------------------------------------------------------------------------------------------------------------------------------------------------------------------------------------------------------------------------------------------------------------------------------------------------------------------------------------|
| 1.  | PROMS.mp. [mp=title, abstract, original title, name of substance word, subject heading word, floating sub-heading word, keyword heading word, organism supplementary concept word, protocol supplementary concept word, rare disease supplementary concept word, unique identifier, synonyms]                                                                                                                   |
| 2.  | PROs.mp. [mp=title, abstract, original title, name of substance word, subject heading word, floating sub-heading word, keyword heading word, organism supplementary concept word, protocol supplementary concept word, rare disease supplementary concept word, unique identifier, synonyms]                                                                                                                    |
| 3.  | patient-reported outcome*.mp. [mp=title, abstract, original title, name of substance word, subject heading word, floating sub-heading word, keyword heading word, organism supplementary concept word, protocol supplementary concept word, rare disease supplementary concept word, unique identifier, synonyms]                                                                                               |
| 4.  | patient outcome*.mp. [mp=title, abstract, original title, name of substance word, subject heading word, floating sub-heading word, keyword heading word, organism supplementary concept word, protocol supplementary concept word, rare disease supplementary concept word, unique identifier, synonyms]                                                                                                        |
| 5.  | (patient* adj1 (self-assess* or self-report* or self-monitor*)).mp. [mp=title, abstract, original title, name of substance word, subject heading word, floating sub-heading word, keyword heading word, organism supplementary concept word, protocol supplementary concept word, rare disease supplementary concept word, unique identifier, synonyms]                                                         |
| 6.  | Diabetes Mellitus, Type 2/ or Type 2 Diabetes.mp. or Type II Diabetes.mp. or T2DM.mp. or Diabetes Mellitus.mp. [mp=title, abstract, original title, name of substance word, subject heading word, floating sub-heading word, keyword heading word, organism supplementary concept word, protocol supplementary concept word, rare disease supplementary concept word, unique identifier, synonyms]              |
| 7.  | (assess adj4 (distress* or emotion* or psycholog* or psychosocial or wellbeing or well-being or depress* or mental*)).mp. [mp=title, abstract, original title, name of substance word, subject heading word, floating sub-heading word, keyword heading word, organism supplementary concept word, protocol supplementary concept word, rare disease supplementary concept word, unique identifier, synonyms]   |
| 8.  | (monitor* adj4 (distress* or emotion* or psycholog* or psychosocial or wellbeing or well-being or depress* or mental*)).mp. [mp=title, abstract, original title, name of substance word, subject heading word, floating sub-heading word, keyword heading word, organism supplementary concept word, protocol supplementary concept word, rare disease supplementary concept word, unique identifier, synonyms] |
| 9.  | Problem Areas in Diabetes.mp. [mp=title, abstract, original title, name of substance word, subject heading word, floating sub-heading word, keyword heading word, organism supplementary concept word, protocol supplementary concept word, rare disease supplementary concept word, unique identifier, synonyms]                                                                                               |
| 10. | diabetes distress scale.mp. [mp=title, abstract, original title, name of substance word, subject heading word, floating sub-heading word, keyword heading word, organism supplementary concept word, protocol supplementary concept word, rare disease supplementary concept word, unique identifier, synonyms]                                                                                                 |
| 11. | WHO-5.mp. [mp=title, abstract, original title, name of substance word, subject heading word, floating sub-heading word, keyword heading word, organism supplementary concept word, protocol supplementary concept word, rare disease supplementary concept word, unique identifier, synonyms]                                                                                                                   |
| 12. | K10.mp. [mp=title, abstract, original title, name of substance word, subject heading word, floating sub-heading word, keyword heading word, organism supplementary concept word, protocol supplementary concept word, rare disease supplementary concept word, unique identifier, synonyms]                                                                                                                     |
| 13. | PHQ.mp. [mp=title, abstract, original title, name of substance word, subject heading word, floating sub-heading word, keyword heading word, organism supplementary concept word, protocol supplementary concept word, rare disease supplementary concept word, unique identifier, synonyms]                                                                                                                     |
| 14. | patient reported outcome.mp. [mp=title, abstract, original title, name of substance word, subject heading word, floating sub-heading word, keyword heading word, organism supplementary concept word, protocol supplementary concept word, rare disease supplementary concept word, unique identifier, synonyms]                                                                                                |
| 15. | (patient* adj1 (self-assess* or self-report* or self-monitor*)).mp. [mp=title, abstract, original title, name of substance word, subject heading word, floating sub-heading word, keyword heading word, organism supplementary concept word, protocol supplementary concept word, rare disease supplementary concept word, unique identifier, synonyms]                                                         |
| 16. | 1 or 2 or 3 or 4 or 5 or 7 or 8 or 9 or 10 or 11 or 12 or 13 or 14 or 15                                                                                                                                                                                                                                                                                                                                        |
| 17. | T2D.mp. [mp=title, abstract, original title, name of substance word, subject heading word, floating sub-heading word, keyword heading word, organism supplementary concept word, protocol supplementary concept word, rare disease supplementary concept word, unique identifier, synonyms]                                                                                                                     |
| 18. | NIDDM.mp. [mp=title, abstract, original title, name of substance word, subject heading word, floating sub-heading word, keyword heading word, organism supplementary concept word, protocol supplementary concept word, rare disease supplementary concept word, unique identifier, synonyms]                                                                                                                   |

|     |                                                                                                                                                                                                                                                                                                                       |
|-----|-----------------------------------------------------------------------------------------------------------------------------------------------------------------------------------------------------------------------------------------------------------------------------------------------------------------------|
| 19. | noninsulin dependent diabetes.mp. [mp=title, abstract, original title, name of substance word, subject heading word, floating sub-heading word, keyword heading word, organism supplementary concept word, protocol supplementary concept word, rare disease supplementary concept word, unique identifier, synonyms] |
| 20. | 6 or 17 or 18 or 19                                                                                                                                                                                                                                                                                                   |
| 21. | wellbeing.mp. [mp=title, abstract, original title, name of substance word, subject heading word, floating sub-heading word, keyword heading word, organism supplementary concept word, protocol supplementary concept word, rare disease supplementary concept word, unique identifier, synonyms]                     |
| 22. | well-being.mp. [mp=title, abstract, original title, name of substance word, subject heading word, floating sub-heading word, keyword heading word, organism supplementary concept word, protocol supplementary concept word, rare disease supplementary concept word, unique identifier, synonyms]                    |
| 23. | psycholog*.mp. [mp=title, abstract, original title, name of substance word, subject heading word, floating sub-heading word, keyword heading word, organism supplementary concept word, protocol supplementary concept word, rare disease supplementary concept word, unique identifier, synonyms]                    |
| 24. | psychosocial*.mp. [mp=title, abstract, original title, name of substance word, subject heading word, floating sub-heading word, keyword heading word, organism supplementary concept word, protocol supplementary concept word, rare disease supplementary concept word, unique identifier, synonyms]                 |
| 25. | mental*.mp. [mp=title, abstract, original title, name of substance word, subject heading word, floating sub-heading word, keyword heading word, organism supplementary concept word, protocol supplementary concept word, rare disease supplementary concept word, unique identifier, synonyms]                       |
| 26. | anxiety.mp. [mp=title, abstract, original title, name of substance word, subject heading word, floating sub-heading word, keyword heading word, organism supplementary concept word, protocol supplementary concept word, rare disease supplementary concept word, unique identifier, synonyms]                       |
| 27. | depress*.mp. [mp=title, abstract, original title, name of substance word, subject heading word, floating sub-heading word, keyword heading word, organism supplementary concept word, protocol supplementary concept word, rare disease supplementary concept word, unique identifier, synonyms]                      |
| 28. | distress.mp. [mp=title, abstract, original title, name of substance word, subject heading word, floating sub-heading word, keyword heading word, organism supplementary concept word, protocol supplementary concept word, rare disease supplementary concept word, unique identifier, synonyms]                      |
| 29. | mood.mp. [mp=title, abstract, original title, name of substance word, subject heading word, floating sub-heading word, keyword heading word, organism supplementary concept word, protocol supplementary concept word, rare disease supplementary concept word, unique identifier, synonyms]                          |
| 30. | emotion.mp. [mp=title, abstract, original title, name of substance word, subject heading word, floating sub-heading word, keyword heading word, organism supplementary concept word, protocol supplementary concept word, rare disease supplementary concept word, unique identifier, synonyms]                       |
| 31. | 21 or 22 or 23 or 24 or 25 or 26 or 27 or 28 or 29 or 30                                                                                                                                                                                                                                                              |
| 32. | 16 and 20 and 31                                                                                                                                                                                                                                                                                                      |
| 33. | limit 32 to (english language and humans)                                                                                                                                                                                                                                                                             |

## Search Strategy – Embase

|     |                                                                                                                                                                                                                                                                                                                                                                                                                 |
|-----|-----------------------------------------------------------------------------------------------------------------------------------------------------------------------------------------------------------------------------------------------------------------------------------------------------------------------------------------------------------------------------------------------------------------|
| 1.  | exp non insulin dependent diabetes mellitus/                                                                                                                                                                                                                                                                                                                                                                    |
| 2.  | exp diabetes mellitus/                                                                                                                                                                                                                                                                                                                                                                                          |
| 3.  | Type II Diabetes.mp. [mp=title, abstract, original title, name of substance word, subject heading word, floating sub-heading word, keyword heading word, organism supplementary concept word, protocol supplementary concept word, rare disease supplementary concept word, unique identifier, synonyms]                                                                                                        |
| 4.  | T2DM.mp. [mp=title, abstract, original title, name of substance word, subject heading word, floating sub-heading word, keyword heading word, organism supplementary concept word, protocol supplementary concept word, rare disease supplementary concept word, unique identifier, synonyms]                                                                                                                    |
| 5.  | T2D.mp. [mp=title, abstract, original title, name of substance word, subject heading word, floating sub-heading word, keyword heading word, organism supplementary concept word, protocol supplementary concept word, rare disease supplementary concept word, unique identifier, synonyms]                                                                                                                     |
| 6.  | NIDDM.mp. [mp=title, abstract, original title, name of substance word, subject heading word, floating sub-heading word, keyword heading word, organism supplementary concept word, protocol supplementary concept word, rare disease supplementary concept word, unique identifier, synonyms]                                                                                                                   |
| 7.  | 1 or 2 or 3 or 4 or 5 or 6                                                                                                                                                                                                                                                                                                                                                                                      |
| 8.  | exp patient-reported outcome/                                                                                                                                                                                                                                                                                                                                                                                   |
| 9.  | PROMS.mp. [mp=title, abstract, original title, name of substance word, subject heading word, floating sub-heading word, keyword heading word, organism supplementary concept word, protocol supplementary concept word, rare disease supplementary concept word, unique identifier, synonyms]                                                                                                                   |
| 10. | PROs.mp. [mp=title, abstract, original title, name of substance word, subject heading word, floating sub-heading word, keyword heading word, organism supplementary concept word, protocol supplementary concept word, rare disease supplementary concept word, unique identifier, synonyms]                                                                                                                    |
| 11. | patient-reported outcome*.mp. [mp=title, abstract, original title, name of substance word, subject heading word, floating sub-heading word, keyword heading word, organism supplementary concept word, protocol supplementary concept word, rare disease supplementary concept word, unique identifier, synonyms]                                                                                               |
| 12. | (patient* adj1 (self-assess* or self-report* or self-monitor*)).mp. [mp=title, abstract, original title, name of substance word, subject heading word, floating sub-heading word, keyword heading word, organism supplementary concept word, protocol supplementary concept word, rare disease supplementary concept word, unique identifier, synonyms]                                                         |
| 13. | (assess adj4 (distress* or emotion* or psycholog* or psychosocial or wellbeing or well-being or depress* or mental*)).mp. [mp=title, abstract, original title, name of substance word, subject heading word, floating sub-heading word, keyword heading word, organism supplementary concept word, protocol supplementary concept word, rare disease supplementary concept word, unique identifier, synonyms]   |
| 14. | (monitor* adj4 (distress* or emotion* or psycholog* or psychosocial or wellbeing or well-being or depress* or mental*)).mp. [mp=title, abstract, original title, name of substance word, subject heading word, floating sub-heading word, keyword heading word, organism supplementary concept word, protocol supplementary concept word, rare disease supplementary concept word, unique identifier, synonyms] |
| 15. | Problem Areas in Diabetes.mp.                                                                                                                                                                                                                                                                                                                                                                                   |
| 16. | diabetes distress scale.mp. [mp=title, abstract, original title, name of substance word, subject heading word, floating sub-heading word, keyword heading word, organism supplementary concept word, protocol supplementary concept word, rare disease supplementary concept word, unique identifier, synonyms]                                                                                                 |
| 17. | WHO-5.mp. [mp=title, abstract, original title, name of substance word, subject heading word, floating sub-heading word, keyword heading word, organism supplementary concept word, protocol supplementary concept word, rare disease supplementary concept word, unique identifier, synonyms]                                                                                                                   |
| 18. | K10.mp. [mp=title, abstract, original title, name of substance word, subject heading word, floating sub-heading word, keyword heading word, organism supplementary concept word, protocol supplementary concept word, rare disease supplementary concept word, unique identifier, synonyms]                                                                                                                     |
| 19. | PHQ.mp. [mp=title, abstract, original title, name of substance word, subject heading word, floating sub-heading word, keyword heading word, organism supplementary concept word, protocol supplementary concept word, rare disease supplementary concept word, unique identifier, synonyms]                                                                                                                     |
| 20. | exp wellbeing/                                                                                                                                                                                                                                                                                                                                                                                                  |
| 21. | exp psychological wellbeing assessment/                                                                                                                                                                                                                                                                                                                                                                         |
| 22. | well-being.mp. [mp=title, abstract, original title, name of substance word, subject heading word, floating sub-heading word, keyword heading word, organism supplementary concept word, protocol supplementary concept word, rare disease supplementary concept word, unique identifier, synonyms]                                                                                                              |
| 23. | psycholog*.mp. [mp=title, abstract, original title, name of substance word, subject heading word, floating sub-heading word, keyword heading word, organism supplementary concept word, protocol supplementary concept word, rare disease supplementary concept word, unique identifier, synonyms]                                                                                                              |



|     |                                                                                                                                                                                                                                                                                                       |
|-----|-------------------------------------------------------------------------------------------------------------------------------------------------------------------------------------------------------------------------------------------------------------------------------------------------------|
| 24. | psychosocial*.mp. [mp=title, abstract, original title, name of substance word, subject heading word, floating sub-heading word, keyword heading word, organism supplementary concept word, protocol supplementary concept word, rare disease supplementary concept word, unique identifier, synonyms] |
| 25. | mental*.mp. [mp=title, abstract, original title, name of substance word, subject heading word, floating sub-heading word, keyword heading word, organism supplementary concept word, protocol supplementary concept word, rare disease supplementary concept word, unique identifier, synonyms]       |
| 26. | exp mental health/                                                                                                                                                                                                                                                                                    |
| 27. | exp anxiety/                                                                                                                                                                                                                                                                                          |
| 28. | depression/                                                                                                                                                                                                                                                                                           |
| 29. | distress.mp. [mp=title, abstract, original title, name of substance word, subject heading word, floating sub-heading word, keyword heading word, organism supplementary concept word, protocol supplementary concept word, rare disease supplementary concept word, unique identifier, synonyms]      |
| 30. | exp mood/                                                                                                                                                                                                                                                                                             |
| 31. | exp emotion/                                                                                                                                                                                                                                                                                          |
| 32. | 20 or 22 or 23 or 24 or 25 or 26 or 27 or 28 or 29 or 30 or 31                                                                                                                                                                                                                                        |
| 33. | 8 or 9 or 10 or 11 or 12 or 13 or 14 or 15 or 16 or 17 or 18 or 19 or 21                                                                                                                                                                                                                              |
| 34. | 7 and 32 and 33                                                                                                                                                                                                                                                                                       |
| 35. | limit 34 to (human and english language)                                                                                                                                                                                                                                                              |

## Search Strategy – APA PsycArticles

|     |                                                                                                                                                                                                                                                                                                                                                                                                                 |
|-----|-----------------------------------------------------------------------------------------------------------------------------------------------------------------------------------------------------------------------------------------------------------------------------------------------------------------------------------------------------------------------------------------------------------------|
| 1.  | PROMS.mp. [mp=title, abstract, original title, name of substance word, subject heading word, floating sub-heading word, keyword heading word, organism supplementary concept word, protocol supplementary concept word, rare disease supplementary concept word, unique identifier, synonyms]                                                                                                                   |
| 2.  | PROs.mp. [mp=title, abstract, original title, name of substance word, subject heading word, floating sub-heading word, keyword heading word, organism supplementary concept word, protocol supplementary concept word, rare disease supplementary concept word, unique identifier, synonyms]                                                                                                                    |
| 3.  | patient-reported outcome*.mp. [mp=title, abstract, original title, name of substance word, subject heading word, floating sub-heading word, keyword heading word, organism supplementary concept word, protocol supplementary concept word, rare disease supplementary concept word, unique identifier, synonyms]                                                                                               |
| 4.  | patient outcome*.mp. [mp=title, abstract, original title, name of substance word, subject heading word, floating sub-heading word, keyword heading word, organism supplementary concept word, protocol supplementary concept word, rare disease supplementary concept word, unique identifier, synonyms]                                                                                                        |
| 5.  | (patient* adj1 (self-assess* or self-report* or self-monitor*)).mp. [mp=title, abstract, original title, name of substance word, subject heading word, floating sub-heading word, keyword heading word, organism supplementary concept word, protocol supplementary concept word, rare disease supplementary concept word, unique identifier, synonyms]                                                         |
| 6.  | Diabetes Mellitus, Type 2/ or Type 2 Diabetes.mp. or Type II Diabetes.mp. or T2DM.mp. or Diabetes Mellitus.mp. [mp=title, abstract, original title, name of substance word, subject heading word, floating sub-heading word, keyword heading word, organism supplementary concept word, protocol supplementary concept word, rare disease supplementary concept word, unique identifier, synonyms]              |
| 7.  | (assess adj4 (distress* or emotion* or psycholog* or psychosocial or wellbeing or well-being or depress* or mental*)).mp. [mp=title, abstract, original title, name of substance word, subject heading word, floating sub-heading word, keyword heading word, organism supplementary concept word, protocol supplementary concept word, rare disease supplementary concept word, unique identifier, synonyms]   |
| 8.  | (monitor* adj4 (distress* or emotion* or psycholog* or psychosocial or wellbeing or well-being or depress* or mental*)).mp. [mp=title, abstract, original title, name of substance word, subject heading word, floating sub-heading word, keyword heading word, organism supplementary concept word, protocol supplementary concept word, rare disease supplementary concept word, unique identifier, synonyms] |
| 9.  | Problem Areas in Diabetes.mp. [mp=title, abstract, original title, name of substance word, subject heading word, floating sub-heading word, keyword heading word, organism supplementary concept word, protocol supplementary concept word, rare disease supplementary concept word, unique identifier, synonyms]                                                                                               |
| 10. | diabetes distress scale.mp. [mp=title, abstract, original title, name of substance word, subject heading word, floating sub-heading word, keyword heading word, organism supplementary concept word, protocol supplementary concept word, rare disease supplementary concept word, unique identifier, synonyms]                                                                                                 |
| 11. | WHO-5.mp. [mp=title, abstract, original title, name of substance word, subject heading word, floating sub-heading word, keyword heading word, organism supplementary concept word, protocol supplementary concept word, rare disease supplementary concept word, unique identifier, synonyms]                                                                                                                   |
| 12. | K10.mp. [mp=title, abstract, original title, name of substance word, subject heading word, floating sub-heading word, keyword heading word, organism supplementary concept word, protocol supplementary concept word, rare disease supplementary concept word, unique identifier, synonyms]                                                                                                                     |
| 13. | PHQ.mp. [mp=title, abstract, original title, name of substance word, subject heading word, floating sub-heading word, keyword heading word, organism supplementary concept word, protocol supplementary concept word, rare disease supplementary concept word, unique identifier, synonyms]                                                                                                                     |
| 14. | patient reported outcome.mp. [mp=title, abstract, original title, name of substance word, subject heading word, floating sub-heading word, keyword heading word, organism supplementary concept word, protocol supplementary concept word, rare disease supplementary concept word, unique identifier, synonyms]                                                                                                |
| 15. | (patient* adj1 (self-assess* or self-report* or self-monitor*)).mp. [mp=title, abstract, original title, name of substance word, subject heading word, floating sub-heading word, keyword heading word, organism supplementary concept word, protocol supplementary concept word, rare disease supplementary concept word, unique identifier, synonyms]                                                         |
| 16. | 1 or 2 or 3 or 4 or 5 or 7 or 8 or 9 or 10 or 11 or 12 or 13 or 14 or 15                                                                                                                                                                                                                                                                                                                                        |
| 17. | T2D.mp. [mp=title, abstract, original title, name of substance word, subject heading word, floating sub-heading word, keyword heading word, organism supplementary concept word, protocol supplementary concept word, rare disease supplementary concept word, unique identifier, synonyms]                                                                                                                     |
| 18. | NIDDM.mp. [mp=title, abstract, original title, name of substance word, subject heading word, floating sub-heading word, keyword heading word, organism supplementary concept word, protocol supplementary concept word, rare disease supplementary concept word, unique identifier, synonyms]                                                                                                                   |
| 19. | noninsulin dependent diabetes.mp. [mp=title, abstract, original title, name of substance word, subject heading word, floating sub-heading word, keyword heading word, organism supplementary concept word, protocol supplementary concept word, rare disease supplementary concept word, unique identifier, synonyms]                                                                                           |
| 20. | 6 or 17 or 18 or 19                                                                                                                                                                                                                                                                                                                                                                                             |

|     |                                                                                                                                                                                                                                                                                                       |
|-----|-------------------------------------------------------------------------------------------------------------------------------------------------------------------------------------------------------------------------------------------------------------------------------------------------------|
| 21. | wellbeing.mp. [mp=title, abstract, original title, name of substance word, subject heading word, floating sub-heading word, keyword heading word, organism supplementary concept word, protocol supplementary concept word, rare disease supplementary concept word, unique identifier, synonyms]     |
| 22. | well-being.mp. [mp=title, abstract, original title, name of substance word, subject heading word, floating sub-heading word, keyword heading word, organism supplementary concept word, protocol supplementary concept word, rare disease supplementary concept word, unique identifier, synonyms]    |
| 23. | psycholog*.mp. [mp=title, abstract, original title, name of substance word, subject heading word, floating sub-heading word, keyword heading word, organism supplementary concept word, protocol supplementary concept word, rare disease supplementary concept word, unique identifier, synonyms]    |
| 24. | psychosocial*.mp. [mp=title, abstract, original title, name of substance word, subject heading word, floating sub-heading word, keyword heading word, organism supplementary concept word, protocol supplementary concept word, rare disease supplementary concept word, unique identifier, synonyms] |
| 25. | mental*.mp. [mp=title, abstract, original title, name of substance word, subject heading word, floating sub-heading word, keyword heading word, organism supplementary concept word, protocol supplementary concept word, rare disease supplementary concept word, unique identifier, synonyms]       |
| 26. | anxiety.mp. [mp=title, abstract, original title, name of substance word, subject heading word, floating sub-heading word, keyword heading word, organism supplementary concept word, protocol supplementary concept word, rare disease supplementary concept word, unique identifier, synonyms]       |
| 27. | depress*.mp. [mp=title, abstract, original title, name of substance word, subject heading word, floating sub-heading word, keyword heading word, organism supplementary concept word, protocol supplementary concept word, rare disease supplementary concept word, unique identifier, synonyms]      |
| 28. | distress.mp. [mp=title, abstract, original title, name of substance word, subject heading word, floating sub-heading word, keyword heading word, organism supplementary concept word, protocol supplementary concept word, rare disease supplementary concept word, unique identifier, synonyms]      |
| 29. | mood.mp. [mp=title, abstract, original title, name of substance word, subject heading word, floating sub-heading word, keyword heading word, organism supplementary concept word, protocol supplementary concept word, rare disease supplementary concept word, unique identifier, synonyms]          |
| 30. | emotion.mp. [mp=title, abstract, original title, name of substance word, subject heading word, floating sub-heading word, keyword heading word, organism supplementary concept word, protocol supplementary concept word, rare disease supplementary concept word, unique identifier, synonyms]       |
| 31. | 21 or 22 or 23 or 24 or 25 or 26 or 27 or 28 or 29 or 30                                                                                                                                                                                                                                              |
| 32. | 16 and 20 and 31                                                                                                                                                                                                                                                                                      |
| 33. | limit 32 to (english and human)                                                                                                                                                                                                                                                                       |

## Search Strategy – Cochrane Central Register of Controlled Trials

|     |                                                                                                                                                                                                                                                                                                                                                                                                                 |
|-----|-----------------------------------------------------------------------------------------------------------------------------------------------------------------------------------------------------------------------------------------------------------------------------------------------------------------------------------------------------------------------------------------------------------------|
| 1.  | PROMS.mp. [mp=title, abstract, original title, name of substance word, subject heading word, floating sub-heading word, keyword heading word, organism supplementary concept word, protocol supplementary concept word, rare disease supplementary concept word, unique identifier, synonyms]                                                                                                                   |
| 2.  | PROs.mp. [mp=title, abstract, original title, name of substance word, subject heading word, floating sub-heading word, keyword heading word, organism supplementary concept word, protocol supplementary concept word, rare disease supplementary concept word, unique identifier, synonyms]                                                                                                                    |
| 3.  | patient-reported outcome*.mp. [mp=title, abstract, original title, name of substance word, subject heading word, floating sub-heading word, keyword heading word, organism supplementary concept word, protocol supplementary concept word, rare disease supplementary concept word, unique identifier, synonyms]                                                                                               |
| 4.  | patient outcome*.mp. [mp=title, abstract, original title, name of substance word, subject heading word, floating sub-heading word, keyword heading word, organism supplementary concept word, protocol supplementary concept word, rare disease supplementary concept word, unique identifier, synonyms]                                                                                                        |
| 5.  | (patient* adj1 (self-assess* or self-report* or self-monitor*)).mp. [mp=title, abstract, original title, name of substance word, subject heading word, floating sub-heading word, keyword heading word, organism supplementary concept word, protocol supplementary concept word, rare disease supplementary concept word, unique identifier, synonyms]                                                         |
| 6.  | Diabetes Mellitus, Type 2/ or Type 2 Diabetes.mp. or Type II Diabetes.mp. or T2DM.mp. or Diabetes Mellitus.mp. [mp=title, abstract, original title, name of substance word, subject heading word, floating sub-heading word, keyword heading word, organism supplementary concept word, protocol supplementary concept word, rare disease supplementary concept word, unique identifier, synonyms]              |
| 7.  | (assess adj4 (distress* or emotion* or psycholog* or psychosocial or wellbeing or well-being or depress* or mental*)).mp. [mp=title, abstract, original title, name of substance word, subject heading word, floating sub-heading word, keyword heading word, organism supplementary concept word, protocol supplementary concept word, rare disease supplementary concept word, unique identifier, synonyms]   |
| 8.  | (monitor* adj4 (distress* or emotion* or psycholog* or psychosocial or wellbeing or well-being or depress* or mental*)).mp. [mp=title, abstract, original title, name of substance word, subject heading word, floating sub-heading word, keyword heading word, organism supplementary concept word, protocol supplementary concept word, rare disease supplementary concept word, unique identifier, synonyms] |
| 9.  | Problem Areas in Diabetes.mp. [mp=title, abstract, original title, name of substance word, subject heading word, floating sub-heading word, keyword heading word, organism supplementary concept word, protocol supplementary concept word, rare disease supplementary concept word, unique identifier, synonyms]                                                                                               |
| 10. | diabetes distress scale.mp. [mp=title, abstract, original title, name of substance word, subject heading word, floating sub-heading word, keyword heading word, organism supplementary concept word, protocol supplementary concept word, rare disease supplementary concept word, unique identifier, synonyms]                                                                                                 |
| 11. | WHO-5.mp. [mp=title, abstract, original title, name of substance word, subject heading word, floating sub-heading word, keyword heading word, organism supplementary concept word, protocol supplementary concept word, rare disease supplementary concept word, unique identifier, synonyms]                                                                                                                   |
| 12. | K10.mp. [mp=title, abstract, original title, name of substance word, subject heading word, floating sub-heading word, keyword heading word, organism supplementary concept word, protocol supplementary concept word, rare disease supplementary concept word, unique identifier, synonyms]                                                                                                                     |
| 13. | PHQ.mp. [mp=title, abstract, original title, name of substance word, subject heading word, floating sub-heading word, keyword heading word, organism supplementary concept word, protocol supplementary concept word, rare disease supplementary concept word, unique identifier, synonyms]                                                                                                                     |
| 14. | patient reported outcome.mp. [mp=title, abstract, original title, name of substance word, subject heading word, floating sub-heading word, keyword heading word, organism supplementary concept word, protocol supplementary concept word, rare disease supplementary concept word, unique identifier, synonyms]                                                                                                |
| 15. | (patient* adj1 (self-assess* or self-report* or self-monitor*)).mp. [mp=title, abstract, original title, name of substance word, subject heading word, floating sub-heading word, keyword heading word, organism supplementary concept word, protocol supplementary concept word, rare disease supplementary concept word, unique identifier, synonyms]                                                         |
| 16. | 1 or 2 or 3 or 4 or 5 or 7 or 8 or 9 or 10 or 11 or 12 or 13 or 14 or 15                                                                                                                                                                                                                                                                                                                                        |
| 17. | T2D.mp. [mp=title, abstract, original title, name of substance word, subject heading word, floating sub-heading word, keyword heading word, organism supplementary concept word, protocol supplementary concept word, rare disease supplementary concept word, unique identifier, synonyms]                                                                                                                     |
| 18. | NIDDM.mp. [mp=title, abstract, original title, name of substance word, subject heading word, floating sub-heading word, keyword heading word, organism supplementary concept word, protocol supplementary concept word, rare disease supplementary concept word, unique identifier, synonyms]                                                                                                                   |
| 19. | noninsulin dependent diabetes.mp. [mp=title, abstract, original title, name of substance word, subject heading word, floating sub-heading word, keyword heading word, organism supplementary concept word, protocol supplementary concept word, rare disease supplementary concept word, unique identifier, synonyms]                                                                                           |
| 20. | 6 or 17 or 18 or 19                                                                                                                                                                                                                                                                                                                                                                                             |

|     |                                                                                                                                                                                                                                                                                                       |
|-----|-------------------------------------------------------------------------------------------------------------------------------------------------------------------------------------------------------------------------------------------------------------------------------------------------------|
| 21. | wellbeing.mp. [mp=title, abstract, original title, name of substance word, subject heading word, floating sub-heading word, keyword heading word, organism supplementary concept word, protocol supplementary concept word, rare disease supplementary concept word, unique identifier, synonyms]     |
| 22. | well-being.mp. [mp=title, abstract, original title, name of substance word, subject heading word, floating sub-heading word, keyword heading word, organism supplementary concept word, protocol supplementary concept word, rare disease supplementary concept word, unique identifier, synonyms]    |
| 23. | psycholog*.mp. [mp=title, abstract, original title, name of substance word, subject heading word, floating sub-heading word, keyword heading word, organism supplementary concept word, protocol supplementary concept word, rare disease supplementary concept word, unique identifier, synonyms]    |
| 24. | psychosocial*.mp. [mp=title, abstract, original title, name of substance word, subject heading word, floating sub-heading word, keyword heading word, organism supplementary concept word, protocol supplementary concept word, rare disease supplementary concept word, unique identifier, synonyms] |
| 25. | mental*.mp. [mp=title, abstract, original title, name of substance word, subject heading word, floating sub-heading word, keyword heading word, organism supplementary concept word, protocol supplementary concept word, rare disease supplementary concept word, unique identifier, synonyms]       |
| 26. | anxiety.mp. [mp=title, abstract, original title, name of substance word, subject heading word, floating sub-heading word, keyword heading word, organism supplementary concept word, protocol supplementary concept word, rare disease supplementary concept word, unique identifier, synonyms]       |
| 27. | depress*.mp. [mp=title, abstract, original title, name of substance word, subject heading word, floating sub-heading word, keyword heading word, organism supplementary concept word, protocol supplementary concept word, rare disease supplementary concept word, unique identifier, synonyms]      |
| 28. | distress.mp. [mp=title, abstract, original title, name of substance word, subject heading word, floating sub-heading word, keyword heading word, organism supplementary concept word, protocol supplementary concept word, rare disease supplementary concept word, unique identifier, synonyms]      |
| 29. | mood.mp. [mp=title, abstract, original title, name of substance word, subject heading word, floating sub-heading word, keyword heading word, organism supplementary concept word, protocol supplementary concept word, rare disease supplementary concept word, unique identifier, synonyms]          |
| 30. | emotion.mp. [mp=title, abstract, original title, name of substance word, subject heading word, floating sub-heading word, keyword heading word, organism supplementary concept word, protocol supplementary concept word, rare disease supplementary concept word, unique identifier, synonyms]       |
| 31. | 21 or 22 or 23 or 24 or 25 or 26 or 27 or 28 or 29 or 30                                                                                                                                                                                                                                              |
| 32. | 16 and 20 and 31                                                                                                                                                                                                                                                                                      |
| 33. | limit 32 to english language                                                                                                                                                                                                                                                                          |

## Search Strategy – Cochrane Database of Systematic Reviews

|     |                                                                                                                                                                                                                                                                                                                                                                                                                 |
|-----|-----------------------------------------------------------------------------------------------------------------------------------------------------------------------------------------------------------------------------------------------------------------------------------------------------------------------------------------------------------------------------------------------------------------|
| 1.  | PROMS.mp. [mp=title, abstract, original title, name of substance word, subject heading word, floating sub-heading word, keyword heading word, organism supplementary concept word, protocol supplementary concept word, rare disease supplementary concept word, unique identifier, synonyms]                                                                                                                   |
| 2.  | PROs.mp. [mp=title, abstract, original title, name of substance word, subject heading word, floating sub-heading word, keyword heading word, organism supplementary concept word, protocol supplementary concept word, rare disease supplementary concept word, unique identifier, synonyms]                                                                                                                    |
| 3.  | patient-reported outcome*.mp. [mp=title, abstract, original title, name of substance word, subject heading word, floating sub-heading word, keyword heading word, organism supplementary concept word, protocol supplementary concept word, rare disease supplementary concept word, unique identifier, synonyms]                                                                                               |
| 4.  | patient outcome*.mp. [mp=title, abstract, original title, name of substance word, subject heading word, floating sub-heading word, keyword heading word, organism supplementary concept word, protocol supplementary concept word, rare disease supplementary concept word, unique identifier, synonyms]                                                                                                        |
| 5.  | (patient* adj1 (self-assess* or self-report* or self-monitor*)).mp. [mp=title, abstract, original title, name of substance word, subject heading word, floating sub-heading word, keyword heading word, organism supplementary concept word, protocol supplementary concept word, rare disease supplementary concept word, unique identifier, synonyms]                                                         |
| 6.  | Diabetes Mellitus, Type 2/ or Type 2 Diabetes.mp. or Type II Diabetes.mp. or T2DM.mp. or Diabetes Mellitus.mp. [mp=title, abstract, original title, name of substance word, subject heading word, floating sub-heading word, keyword heading word, organism supplementary concept word, protocol supplementary concept word, rare disease supplementary concept word, unique identifier, synonyms]              |
| 7.  | (assess adj4 (distress* or emotion* or psycholog* or psychosocial or wellbeing or well-being or depress* or mental*)).mp. [mp=title, abstract, original title, name of substance word, subject heading word, floating sub-heading word, keyword heading word, organism supplementary concept word, protocol supplementary concept word, rare disease supplementary concept word, unique identifier, synonyms]   |
| 8.  | (monitor* adj4 (distress* or emotion* or psycholog* or psychosocial or wellbeing or well-being or depress* or mental*)).mp. [mp=title, abstract, original title, name of substance word, subject heading word, floating sub-heading word, keyword heading word, organism supplementary concept word, protocol supplementary concept word, rare disease supplementary concept word, unique identifier, synonyms] |
| 9.  | Problem Areas in Diabetes.mp. [mp=title, abstract, original title, name of substance word, subject heading word, floating sub-heading word, keyword heading word, organism supplementary concept word, protocol supplementary concept word, rare disease supplementary concept word, unique identifier, synonyms]                                                                                               |
| 10. | diabetes distress scale.mp. [mp=title, abstract, original title, name of substance word, subject heading word, floating sub-heading word, keyword heading word, organism supplementary concept word, protocol supplementary concept word, rare disease supplementary concept word, unique identifier, synonyms]                                                                                                 |
| 11. | WHO-5.mp. [mp=title, abstract, original title, name of substance word, subject heading word, floating sub-heading word, keyword heading word, organism supplementary concept word, protocol supplementary concept word, rare disease supplementary concept word, unique identifier, synonyms]                                                                                                                   |
| 12. | K10.mp. [mp=title, abstract, original title, name of substance word, subject heading word, floating sub-heading word, keyword heading word, organism supplementary concept word, protocol supplementary concept word, rare disease supplementary concept word, unique identifier, synonyms]                                                                                                                     |
| 13. | PHQ.mp. [mp=title, abstract, original title, name of substance word, subject heading word, floating sub-heading word, keyword heading word, organism supplementary concept word, protocol supplementary concept word, rare disease supplementary concept word, unique identifier, synonyms]                                                                                                                     |
| 14. | patient reported outcome.mp. [mp=title, abstract, original title, name of substance word, subject heading word, floating sub-heading word, keyword heading word, organism supplementary concept word, protocol supplementary concept word, rare disease supplementary concept word, unique identifier, synonyms]                                                                                                |
| 15. | (patient* adj1 (self-assess* or self-report* or self-monitor*)).mp. [mp=title, abstract, original title, name of substance word, subject heading word, floating sub-heading word, keyword heading word, organism supplementary concept word, protocol supplementary concept word, rare disease supplementary concept word, unique identifier, synonyms]                                                         |
| 16. | 1 or 2 or 3 or 4 or 5 or 7 or 8 or 9 or 10 or 11 or 12 or 13 or 14 or 15                                                                                                                                                                                                                                                                                                                                        |
| 17. | T2D.mp. [mp=title, abstract, original title, name of substance word, subject heading word, floating sub-heading word, keyword heading word, organism supplementary concept word, protocol supplementary concept word, rare disease supplementary concept word, unique identifier, synonyms]                                                                                                                     |
| 18. | NIDDM.mp. [mp=title, abstract, original title, name of substance word, subject heading word, floating sub-heading word, keyword heading word, organism supplementary concept word, protocol supplementary concept word, rare disease supplementary concept word, unique identifier, synonyms]                                                                                                                   |
| 19. | noninsulin dependent diabetes.mp. [mp=title, abstract, original title, name of substance word, subject heading word, floating sub-heading word, keyword heading word, organism supplementary concept word, protocol supplementary concept word, rare disease supplementary concept word, unique identifier, synonyms]                                                                                           |
| 20. | 6 or 17 or 18 or 19                                                                                                                                                                                                                                                                                                                                                                                             |

|     |                                                                                                                                                                                                                                                                                                       |
|-----|-------------------------------------------------------------------------------------------------------------------------------------------------------------------------------------------------------------------------------------------------------------------------------------------------------|
| 21. | wellbeing.mp. [mp=title, abstract, original title, name of substance word, subject heading word, floating sub-heading word, keyword heading word, organism supplementary concept word, protocol supplementary concept word, rare disease supplementary concept word, unique identifier, synonyms]     |
| 22. | well-being.mp. [mp=title, abstract, original title, name of substance word, subject heading word, floating sub-heading word, keyword heading word, organism supplementary concept word, protocol supplementary concept word, rare disease supplementary concept word, unique identifier, synonyms]    |
| 23. | psycholog*.mp. [mp=title, abstract, original title, name of substance word, subject heading word, floating sub-heading word, keyword heading word, organism supplementary concept word, protocol supplementary concept word, rare disease supplementary concept word, unique identifier, synonyms]    |
| 24. | psychosocial*.mp. [mp=title, abstract, original title, name of substance word, subject heading word, floating sub-heading word, keyword heading word, organism supplementary concept word, protocol supplementary concept word, rare disease supplementary concept word, unique identifier, synonyms] |
| 25. | mental*.mp. [mp=title, abstract, original title, name of substance word, subject heading word, floating sub-heading word, keyword heading word, organism supplementary concept word, protocol supplementary concept word, rare disease supplementary concept word, unique identifier, synonyms]       |
| 26. | anxiety.mp. [mp=title, abstract, original title, name of substance word, subject heading word, floating sub-heading word, keyword heading word, organism supplementary concept word, protocol supplementary concept word, rare disease supplementary concept word, unique identifier, synonyms]       |
| 27. | depress*.mp. [mp=title, abstract, original title, name of substance word, subject heading word, floating sub-heading word, keyword heading word, organism supplementary concept word, protocol supplementary concept word, rare disease supplementary concept word, unique identifier, synonyms]      |
| 28. | distress.mp. [mp=title, abstract, original title, name of substance word, subject heading word, floating sub-heading word, keyword heading word, organism supplementary concept word, protocol supplementary concept word, rare disease supplementary concept word, unique identifier, synonyms]      |
| 29. | mood.mp. [mp=title, abstract, original title, name of substance word, subject heading word, floating sub-heading word, keyword heading word, organism supplementary concept word, protocol supplementary concept word, rare disease supplementary concept word, unique identifier, synonyms]          |
| 30. | emotion.mp. [mp=title, abstract, original title, name of substance word, subject heading word, floating sub-heading word, keyword heading word, organism supplementary concept word, protocol supplementary concept word, rare disease supplementary concept word, unique identifier, synonyms]       |
| 31. | 21 or 22 or 23 or 24 or 25 or 26 or 27 or 28 or 29 or 30                                                                                                                                                                                                                                              |
| 32. | 16 and 20 and 31                                                                                                                                                                                                                                                                                      |



## Search Strategy – CINAHL Complete

|    |                                                                                                                                                                                                                                                                                                                                                                                                                                                                                                       |
|----|-------------------------------------------------------------------------------------------------------------------------------------------------------------------------------------------------------------------------------------------------------------------------------------------------------------------------------------------------------------------------------------------------------------------------------------------------------------------------------------------------------|
| S3 | (( wellbeing or well-being or well being ) OR psychological OR distress OR psychosocial OR anxiety OR depression OR ( mood or emotions or feelings )) AND (S1 AND S2)                                                                                                                                                                                                                                                                                                                                 |
| S2 | diabetes mellitus OR diabetes type 2 OR diabetes mellitus type 2 OR Type II Diabetes OR type 2 diabetes OR type 2 diabetes mellitus OR t2dm OR t2d OR niddm OR non-insulin dependent diabetes OR non insulin dependent diabetes mellitus                                                                                                                                                                                                                                                              |
| S1 | ( (proms or patient-reported outcome measures ) OR PROs OR ( (patient* adj1 (self-assess* or self-report* or self-monitor*)) ) OR ( (assess adj4 (distress* or emotion* or psycholog* or psychosocial or wellbeing or well-being or depress* or mental*)) ) OR ( (monitor* adj4 (distress* or emotion* or psycholog* or psychosocial or wellbeing or well-being or depress* or mental*)) ) OR Problem Areas in Diabetes OR diabetes distress scale OR WHO-5 OR K10 OR PHQ OR patient reported outcome |

For peer review only



## Supplementary File 2. Risk of bias assessment

Table 1. Risk of bias as assessed using the Risk of Bias 2.<sup>35</sup>

| Author (year)                              | Randomisation process | Deviations from intended interventions | Missing outcome data | Measurement of the outcome | Selection of the reported result | Overall Bias  |
|--------------------------------------------|-----------------------|----------------------------------------|----------------------|----------------------------|----------------------------------|---------------|
| Cummings et al. (2019) <sup>40</sup>       | Low                   | Low                                    | Low                  | Low                        | Low                              | Low           |
| Dobler et al. (2018) <sup>44</sup>         | Low                   | Low                                    | High                 | Low                        | Low                              | Some concerns |
| Ell et al. (2011) <sup>38</sup>            | Low                   | High                                   | Low                  | Low                        | Low                              | Low           |
| Naik et al. (2019) <sup>37</sup>           | Low                   | Low                                    | Some concerns        | Low                        | Low                              | Some concerns |
| Rees et al. (2017) <sup>43</sup>           | Low                   | Low                                    | Low                  | Low                        | Low                              | Low           |
| Sigurdardottir et al. (2009) <sup>45</sup> | Low                   | Some concerns                          | Low                  | Low                        | Low                              | Low           |

Table 2. Risk of bias as assessed using the Risk Of Bias In Non-randomized Studies – of Interventions (ROBINS-I) assessment tool.<sup>36</sup>

| Author (year)                        | Bias due to confounding | Bias in selection of participants into the study | Bias in classification of interventions | Bias due to deviations from intended interventions | Bias due to missing data | Bias in measurement of outcomes | Bias in selection of the reported result | Overall Bias |
|--------------------------------------|-------------------------|--------------------------------------------------|-----------------------------------------|----------------------------------------------------|--------------------------|---------------------------------|------------------------------------------|--------------|
| Johnson et al. (2014) <sup>41</sup>  | Moderate                | Low                                              | Low                                     | Low                                                | Moderate                 | Low                             | Low                                      | Moderate     |
| Fortmann et al. (2020) <sup>42</sup> | Moderate                | Low                                              | Low                                     | Low                                                | Low                      | Low                             | Low                                      | Moderate     |
| Wu et al. (2018) <sup>39</sup>       | Moderate                | Low                                              | Low                                     | Low                                                | Moderate                 | Moderate                        | Low                                      | Moderate     |



## PRISMA 2020 Checklist

| Section and Topic             | Item # | Checklist item                                                                                                                                                                                                                                                                                       | Location where item is reported |
|-------------------------------|--------|------------------------------------------------------------------------------------------------------------------------------------------------------------------------------------------------------------------------------------------------------------------------------------------------------|---------------------------------|
| <b>TITLE</b>                  |        |                                                                                                                                                                                                                                                                                                      |                                 |
| Title                         | 1      | Identify the report as a systematic review.                                                                                                                                                                                                                                                          | 1                               |
| <b>ABSTRACT</b>               |        |                                                                                                                                                                                                                                                                                                      |                                 |
| Abstract                      | 2      | See the PRISMA 2020 for Abstracts checklist.                                                                                                                                                                                                                                                         | 1                               |
| <b>INTRODUCTION</b>           |        |                                                                                                                                                                                                                                                                                                      |                                 |
| Rationale                     | 3      | Describe the rationale for the review in the context of existing knowledge.                                                                                                                                                                                                                          | 5                               |
| Objectives                    | 4      | Provide an explicit statement of the objective(s) or question(s) the review addresses.                                                                                                                                                                                                               | 5                               |
| <b>METHODS</b>                |        |                                                                                                                                                                                                                                                                                                      |                                 |
| Eligibility criteria          | 5      | Specify the inclusion and exclusion criteria for the review and how studies were grouped for the syntheses.                                                                                                                                                                                          | 5                               |
| Information sources           | 6      | Specify all databases, registers, websites, organisations, reference lists and other sources searched or consulted to identify studies. Specify the date when each source was last searched or consulted.                                                                                            | 6                               |
| Search strategy               | 7      | Present the full search strategies for all databases, registers and websites, including any filters and limits used.                                                                                                                                                                                 | Supplementary Document 1        |
| Selection process             | 8      | Specify the methods used to decide whether a study met the inclusion criteria of the review, including how many reviewers screened each record and each report retrieved, whether they worked independently, and if applicable, details of automation tools used in the process.                     | 6                               |
| Data collection process       | 9      | Specify the methods used to collect data from reports, including how many reviewers collected data from each report, whether they worked independently, any processes for obtaining or confirming data from study investigators, and if applicable, details of automation tools used in the process. | 6                               |
| Data items                    | 10a    | List and define all outcomes for which data were sought. Specify whether all results that were compatible with each outcome domain in each study were sought (e.g. for all measures, time points, analyses), and if not, the methods used to decide which results to collect.                        | 6                               |
|                               | 10b    | List and define all other variables for which data were sought (e.g. participant and intervention characteristics, funding sources). Describe any assumptions made about any missing or unclear information.                                                                                         | 6                               |
| Study risk of bias assessment | 11     | Specify the methods used to assess risk of bias in the included studies, including details of the tool(s) used, how many reviewers assessed each study and whether they worked independently, and if applicable, details of automation tools used in the process.                                    | 7                               |
| Effect measures               | 12     | Specify for each outcome the effect measure(s) (e.g. risk ratio, mean difference) used in the synthesis or presentation of results.                                                                                                                                                                  | N/A                             |
| Synthesis methods             | 13a    | Describe the processes used to decide which studies were eligible for each synthesis (e.g. tabulating the study intervention characteristics and comparing against the planned groups for each synthesis (item #5)).                                                                                 | N/A                             |
|                               | 13b    | Describe any methods required to prepare the data for presentation or synthesis, such as handling of missing summary statistics, or data conversions.                                                                                                                                                | N/A                             |
|                               | 13c    | Describe any methods used to tabulate or visually display results of individual studies and syntheses.                                                                                                                                                                                               | N/A                             |
|                               | 13d    | Describe any methods used to synthesize results and provide a rationale for the choice(s). If meta-analysis was performed, describe the model(s), method(s) to identify the presence and extent of statistical heterogeneity, and software package(s) used.                                          | N/A                             |
|                               | 13e    | Describe any methods used to explore possible causes of heterogeneity among study results (e.g. subgroup analysis, meta-regression).                                                                                                                                                                 | N/A                             |
|                               | 13f    | Describe any sensitivity analyses conducted to assess robustness of the synthesized results.                                                                                                                                                                                                         | N/A                             |
| Reporting bias assessment     | 14     | Describe any methods used to assess risk of bias due to missing results in a synthesis (arising from reporting biases).                                                                                                                                                                              | N/A                             |
| Certainty                     | 15     | Describe any methods used to assess certainty (or confidence) in the body of evidence for an outcome.                                                                                                                                                                                                | N/A                             |

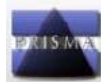

## PRISMA 2020 Checklist

1  
2  
3  
4  
5  
6  
7  
8  
9  
10  
11  
12  
13  
14  
15  
16  
17  
18  
19  
20  
21  
22  
23  
24  
25  
26  
27  
28  
29  
30  
31  
32  
33  
34  
35  
36  
37  
38  
39  
40  
41  
42  
43  
44  
45  
46  
47

| Section and Topic                              | Item # | Checklist item                                                                                                                                                                                                                                                                       | Location where item is reported |
|------------------------------------------------|--------|--------------------------------------------------------------------------------------------------------------------------------------------------------------------------------------------------------------------------------------------------------------------------------------|---------------------------------|
| assessment                                     |        |                                                                                                                                                                                                                                                                                      |                                 |
| <b>RESULTS</b>                                 |        |                                                                                                                                                                                                                                                                                      |                                 |
| Study selection                                | 16a    | Describe the results of the search and selection process, from the number of records identified in the search to the number of studies included in the review, ideally using a flow diagram.                                                                                         | 8                               |
|                                                | 16b    | Cite studies that might appear to meet the inclusion criteria, but which were excluded, and explain why they were excluded.                                                                                                                                                          | N/A                             |
| Study characteristics                          | 17     | Cite each included study and present its characteristics.                                                                                                                                                                                                                            | 10                              |
| Risk of bias in studies                        | 18     | Present assessments of risk of bias for each included study.                                                                                                                                                                                                                         | 17                              |
| Results of individual studies                  | 19     | For all outcomes, present, for each study: (a) summary statistics for each group (where appropriate) and (b) an effect estimate and its precision (e.g. confidence/credible interval), ideally using structured tables or plots.                                                     | Table 3                         |
| Results of syntheses                           | 20a    | For each synthesis, briefly summarise the characteristics and risk of bias among contributing studies.                                                                                                                                                                               | ?                               |
|                                                | 20b    | Present results of all statistical syntheses conducted. If meta-analysis was done, present for each the summary estimate and its precision (e.g. confidence/credible interval) and measures of statistical heterogeneity. If comparing groups, describe the direction of the effect. | N/A                             |
|                                                | 20c    | Present results of all investigations of possible causes of heterogeneity among study results.                                                                                                                                                                                       | N/A                             |
|                                                | 20d    | Present results of all sensitivity analyses conducted to assess the robustness of the synthesized results.                                                                                                                                                                           | N/A                             |
| Reporting biases                               | 21     | Present assessments of risk of bias due to missing results (arising from reporting biases) for each synthesis assessed.                                                                                                                                                              | Table 2                         |
| Certainty of evidence                          | 22     | Present assessments of certainty (or confidence) in the body of evidence for each outcome assessed.                                                                                                                                                                                  | N/A                             |
| <b>DISCUSSION</b>                              |        |                                                                                                                                                                                                                                                                                      |                                 |
| Discussion                                     | 23a    | Provide a general interpretation of the results in the context of other evidence.                                                                                                                                                                                                    | 24                              |
|                                                | 23b    | Discuss any limitations of the evidence included in the review.                                                                                                                                                                                                                      | 26                              |
|                                                | 23c    | Discuss any limitations of the review processes used.                                                                                                                                                                                                                                | 26                              |
|                                                | 23d    | Discuss implications of the results for practice, policy, and future research.                                                                                                                                                                                                       | 26                              |
| <b>OTHER INFORMATION</b>                       |        |                                                                                                                                                                                                                                                                                      |                                 |
| Registration and protocol                      | 24a    | Provide registration information for the review, including register name and registration number, or state that the review was not registered.                                                                                                                                       | 27                              |
|                                                | 24b    | Indicate where the review protocol can be accessed, or state that a protocol was not prepared.                                                                                                                                                                                       | 5                               |
|                                                | 24c    | Describe and explain any amendments to information provided at registration or in the protocol.                                                                                                                                                                                      | N/A                             |
| Support                                        | 25     | Describe sources of financial or non-financial support for the review, and the role of the funders or sponsors in the review.                                                                                                                                                        | 27                              |
| Competing interests                            | 26     | Declare any competing interests of review authors.                                                                                                                                                                                                                                   | 27                              |
| Availability of data, code and other materials | 27     | Report which of the following are publicly available and where they can be found: template data collection forms; data extracted from included studies; data used for all analyses; analytic code; any other materials used in the review.                                           | N/A                             |

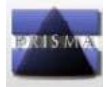

## PRISMA 2020 Checklist

- 1
- 2
- 3
- 4
- 5
- 6
- 7
- 8
- 9
- 10
- 11
- 12
- 13
- 14
- 15
- 16
- 17
- 18
- 19
- 20
- 21
- 22
- 23
- 24
- 25
- 26
- 27
- 28
- 29
- 30
- 31
- 32
- 33
- 34
- 35
- 36
- 37
- 38
- 39
- 40
- 41
- 42
- 43
- 44
- 45
- 46
- 47

10.1136/bmj.n71

For more information, visit: <http://www.prisma-statement.org/>

For peer review only
