# Supplementary material for: Effect of routinely assessing and addressing depression and diabetes distress on clinical outcomes among adults with type 2 diabetes: a systematic review
Source: PubMed Central journal article supplement — BMJ Open. 2022 May 24;12(5):e054650. doi: 10.1136/bmjopen-2021-054650 (PMC9134162; doi:10.1136/bmjopen-2021-054650), 2022-05-24
Supplement: bmjopen-2021-054650supp002.pdf [file bmjopen-2021-054650supp002.pdf]

## Supplementary File 2. Risk of bias assessment

Table 1. Risk of bias as assessed using the Risk of Bias 2.<sup>35</sup>

| Author (year)                              | Randomisation process | Deviations from intended interventions | Missing outcome data | Measurement of the outcome | Selection of the reported result | Overall Bias  |
|--------------------------------------------|-----------------------|----------------------------------------|----------------------|----------------------------|----------------------------------|---------------|
| Cummings et al. (2019) <sup>40</sup>       | Low                   | Low                                    | Low                  | Low                        | Low                              | Low           |
| Dobler et al. (2018) <sup>44</sup>         | Low                   | Low                                    | High                 | Low                        | Low                              | Some concerns |
| Ell et al. (2011) <sup>38</sup>            | Low                   | High                                   | Low                  | Low                        | Low                              | Low           |
| Naik et al. (2019) <sup>37</sup>           | Low                   | Low                                    | Some concerns        | Low                        | Low                              | Some concerns |
| Rees et al. (2017) <sup>43</sup>           | Low                   | Low                                    | Low                  | Low                        | Low                              | Low           |
| Sigurdardottir et al. (2009) <sup>45</sup> | Low                   | Some concerns                          | Low                  | Low                        | Low                              | Low           |

Table 2. Risk of bias as assessed using the Risk Of Bias In Non-randomized Studies – of Interventions (ROBINS-I) assessment tool.<sup>36</sup>

| Author (year)                        | Bias due to confounding | Bias in selection of participants into the study | Bias in classification of interventions | Bias due to deviations from intended interventions | Bias due to missing data | Bias in measurement of outcomes | Bias in selection of the reported result | Overall Bias |
|--------------------------------------|-------------------------|--------------------------------------------------|-----------------------------------------|----------------------------------------------------|--------------------------|---------------------------------|------------------------------------------|--------------|
| Johnson et al. (2014) <sup>41</sup>  | Moderate                | Low                                              | Low                                     | Low                                                | Moderate                 | Low                             | Low                                      | Moderate     |
| Fortmann et al. (2020) <sup>42</sup> | Moderate                | Low                                              | Low                                     | Low                                                | Low                      | Low                             | Low                                      | Moderate     |
| Wu et al. (2018) <sup>39</sup>       | Moderate                | Low                                              | Low                                     | Low                                                | Moderate                 | Moderate                        | Low                                      | Moderate     |
